# Supplementary material
Source: PubMed Central journal article supplement (PMC2546569)
Supplement: NIHMS64016-supplement-1si20051010_03.pdf [file NIHMS64016-supplement-1si20051010_03.pdf]

**Establishing the Absolute Configuration of the Asbestinins: Enantioselective Total  
Synthesis of 11-Acetoxy-4-deoxyasbestinin D**

Michael T. Crimmins\* and J. Michael Ellis

*Venable and Kenan Laboratories of Chemistry  
The University of North Carolina at  
Chapel Hill  
Chapel Hill, North Carolina 27599-3290*

crimmins@email.unc.edu

**Supporting Information: NMR Spectra**

400 MHz in CDCl<sub>3</sub>

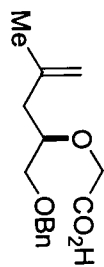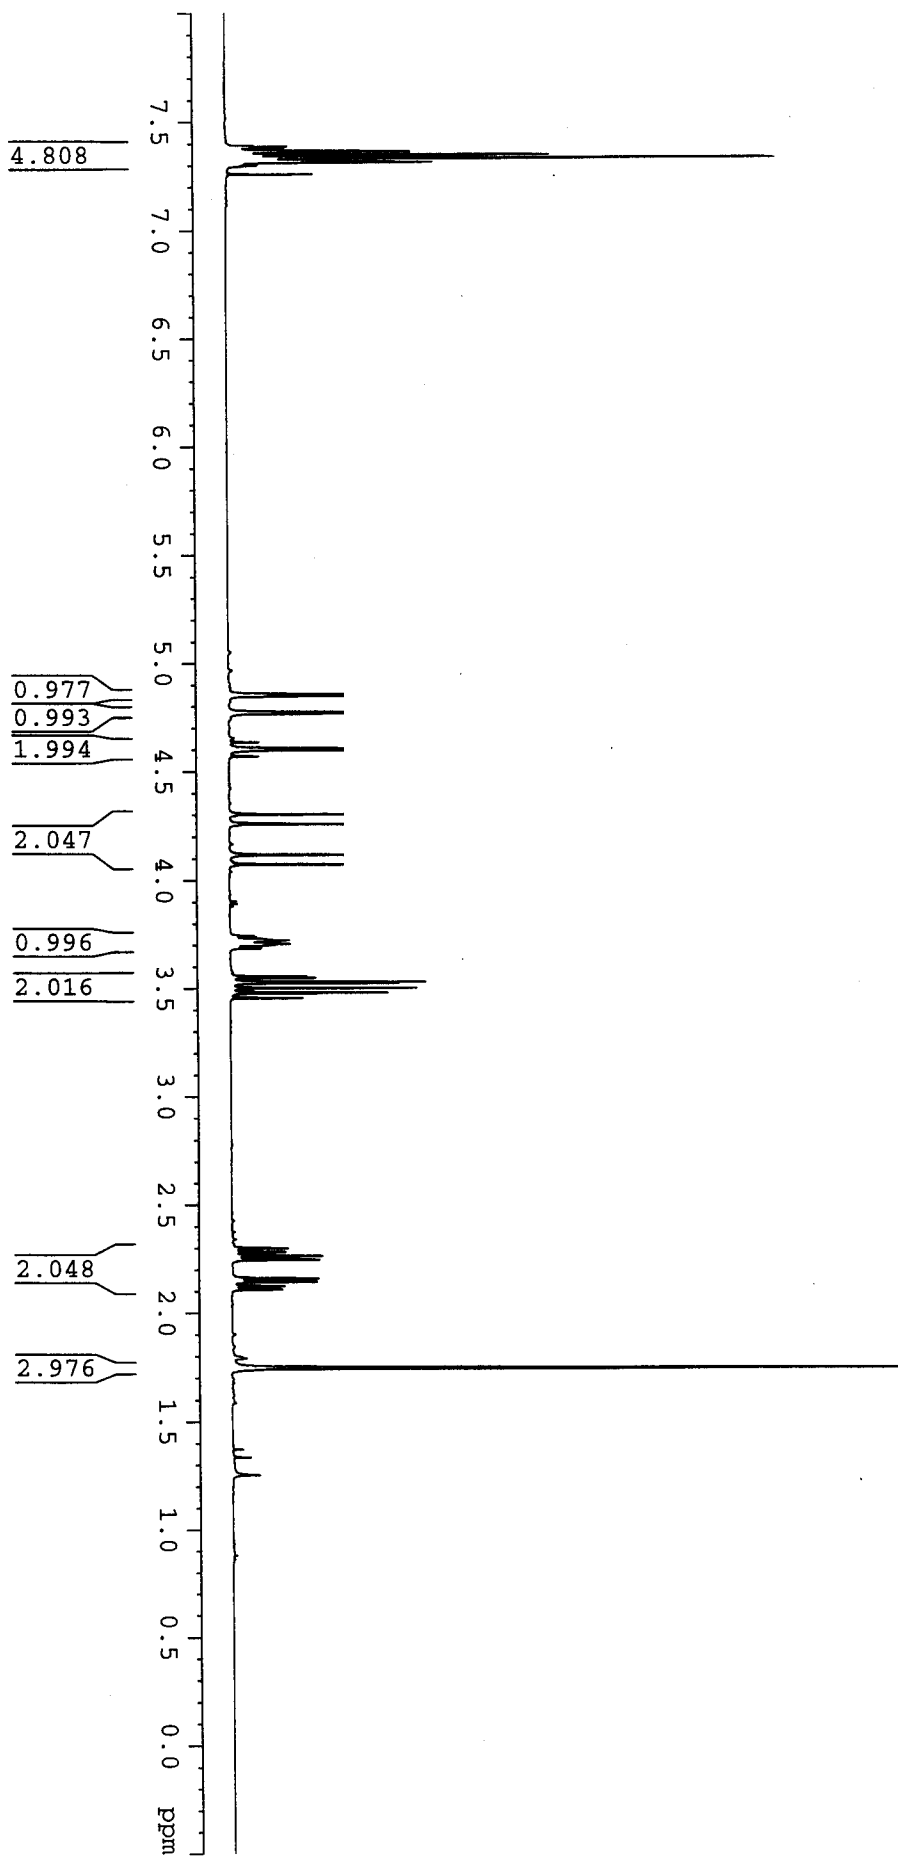

S2

100 MHz in CDCl<sub>3</sub>

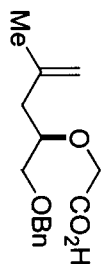

S3

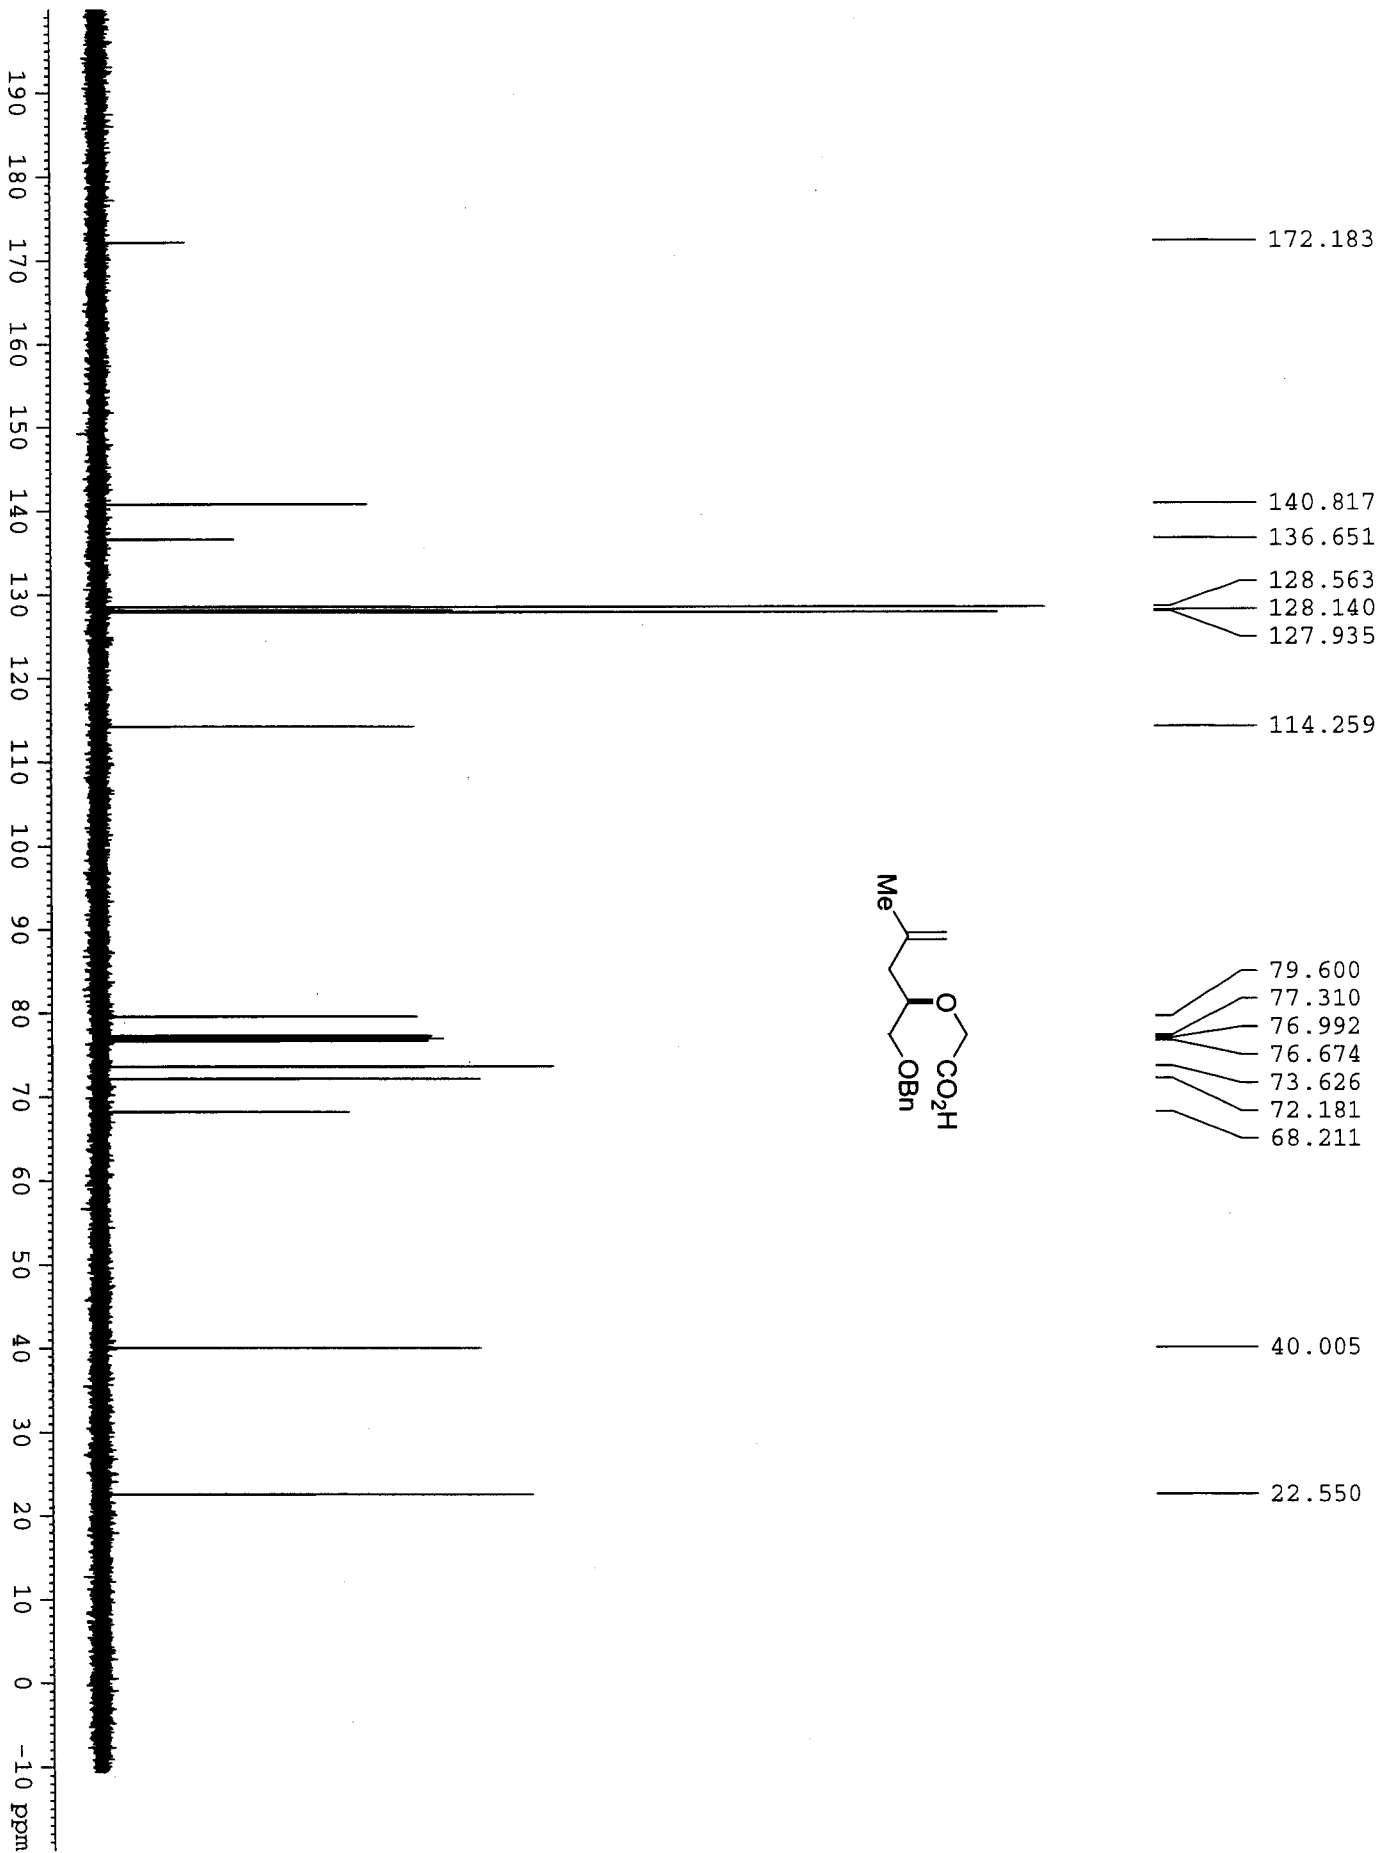

400 MHz in CDCl<sub>3</sub>

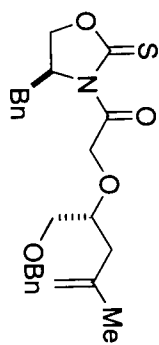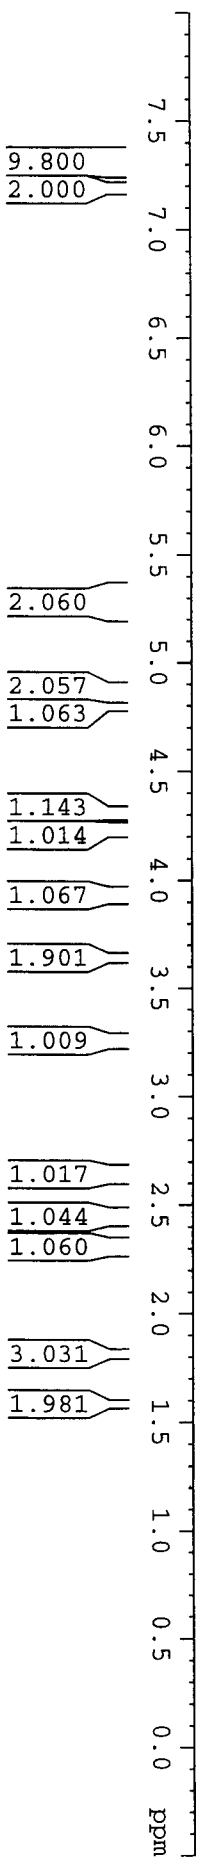

S4

100 MHz in CDCl<sub>3</sub>

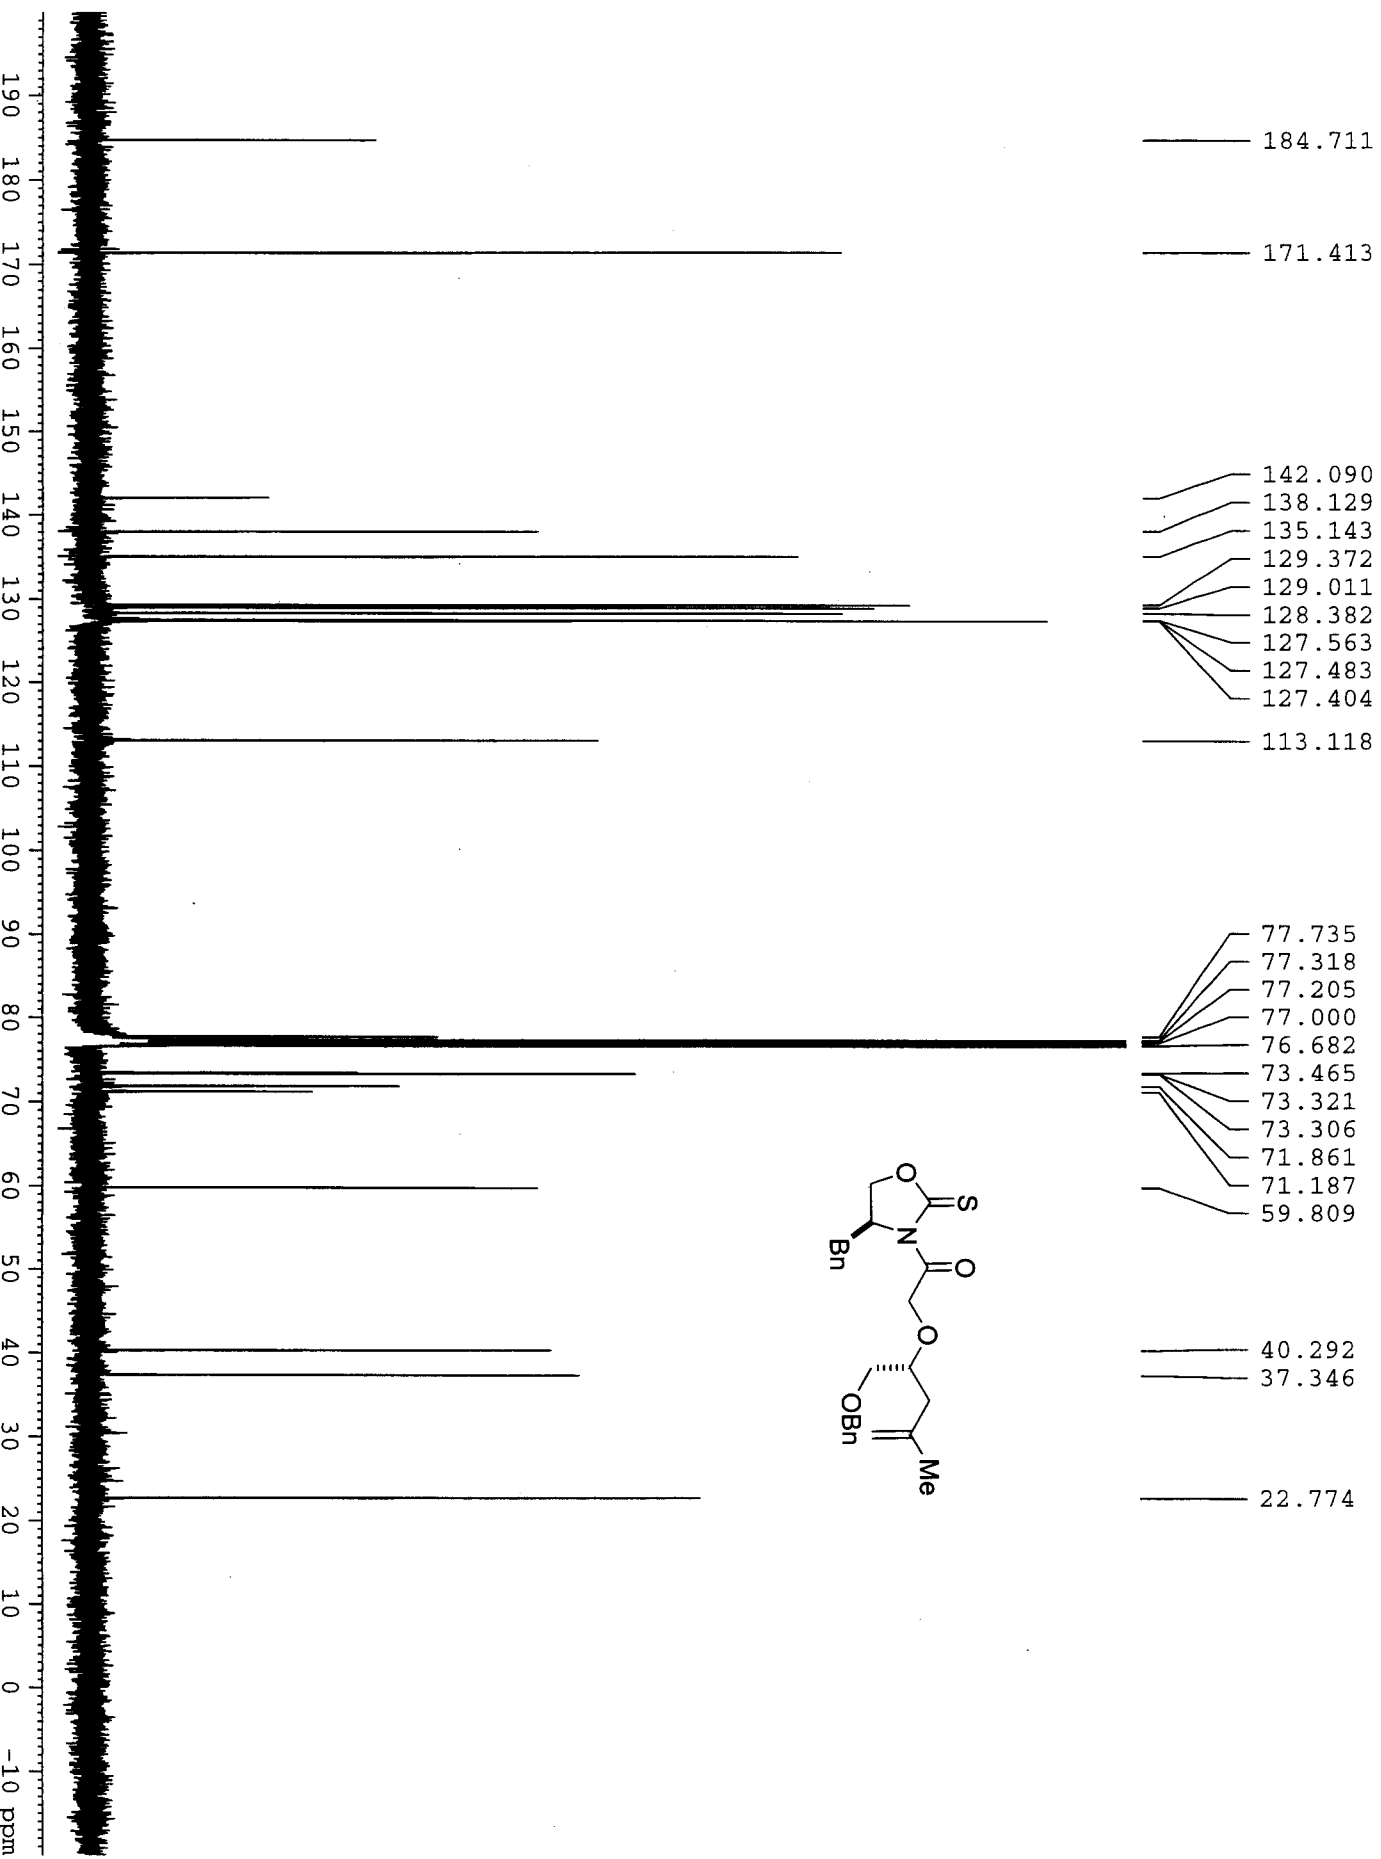

400 MHz in CDCl<sub>3</sub>

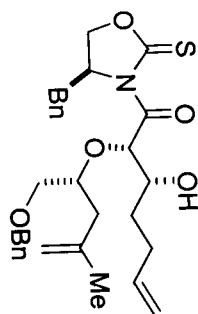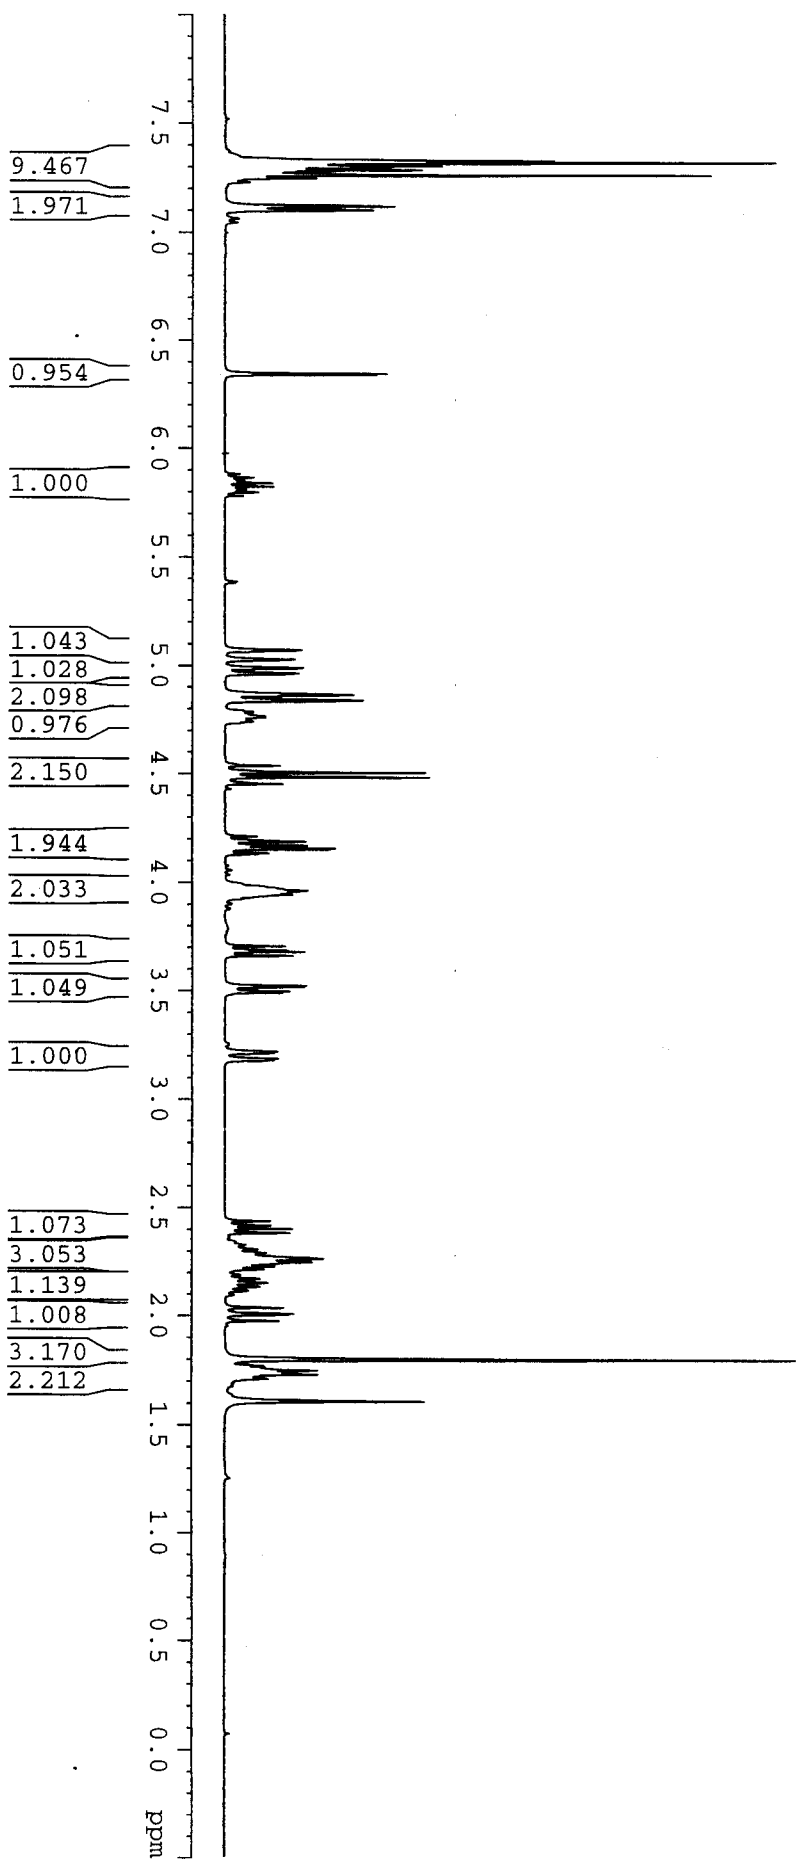

S6

100 MHz in CDCl<sub>3</sub>

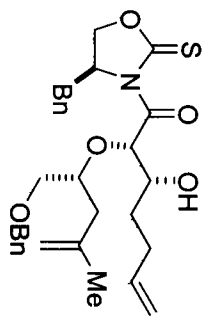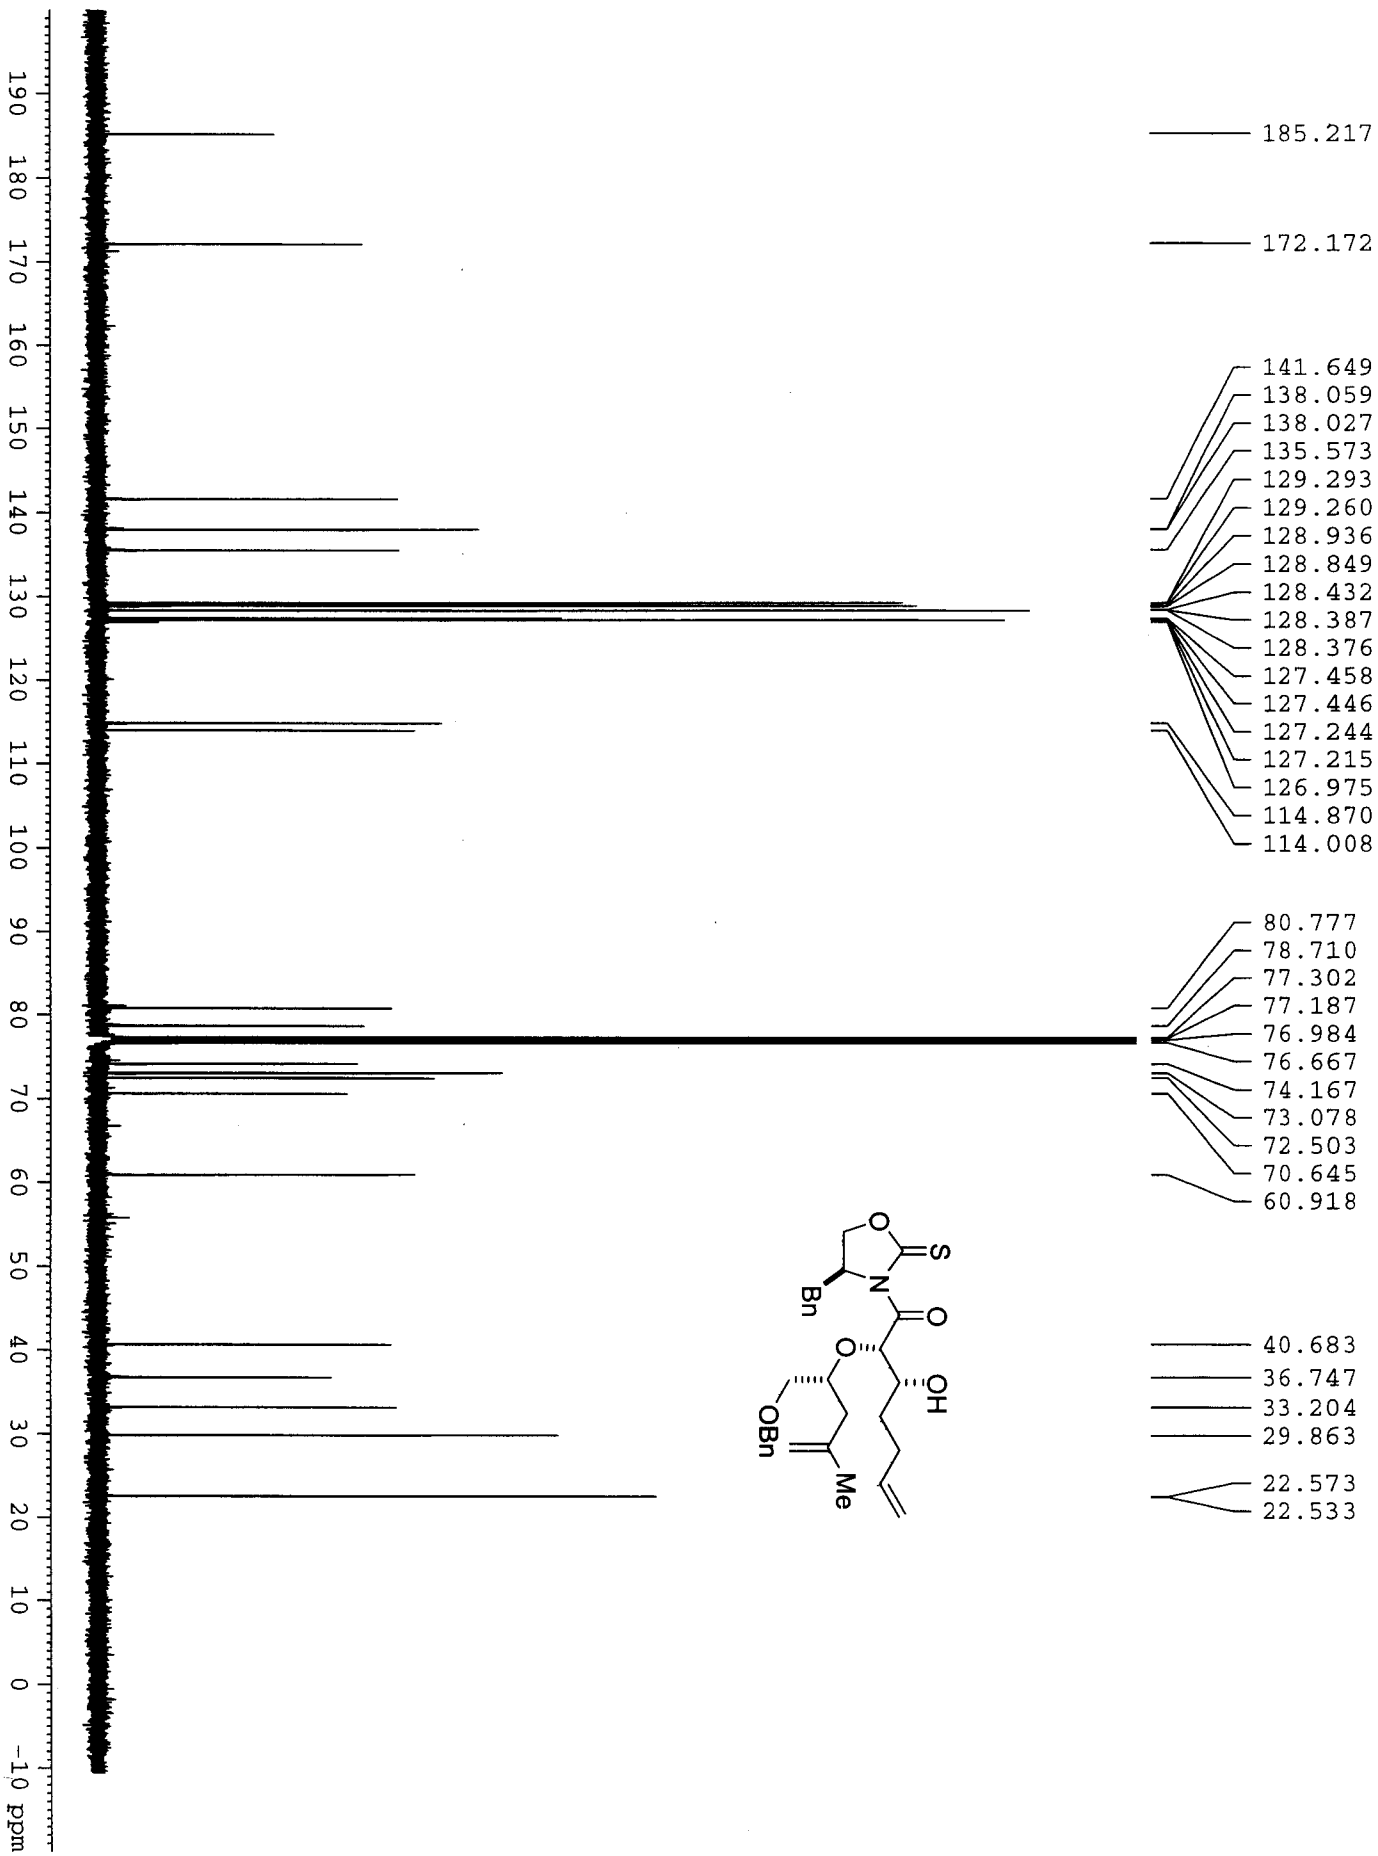

S7

400 MHz in CDCl<sub>3</sub>

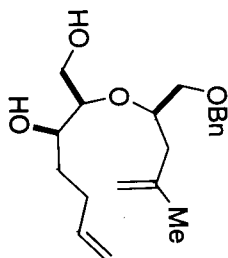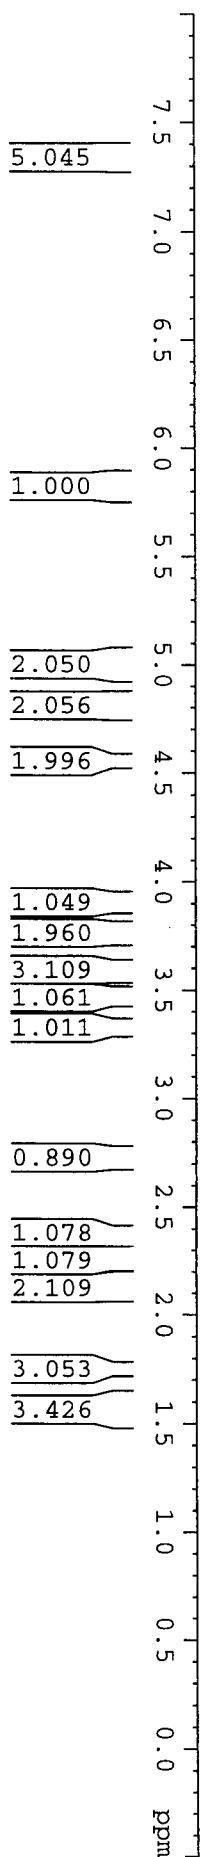

S8



S9

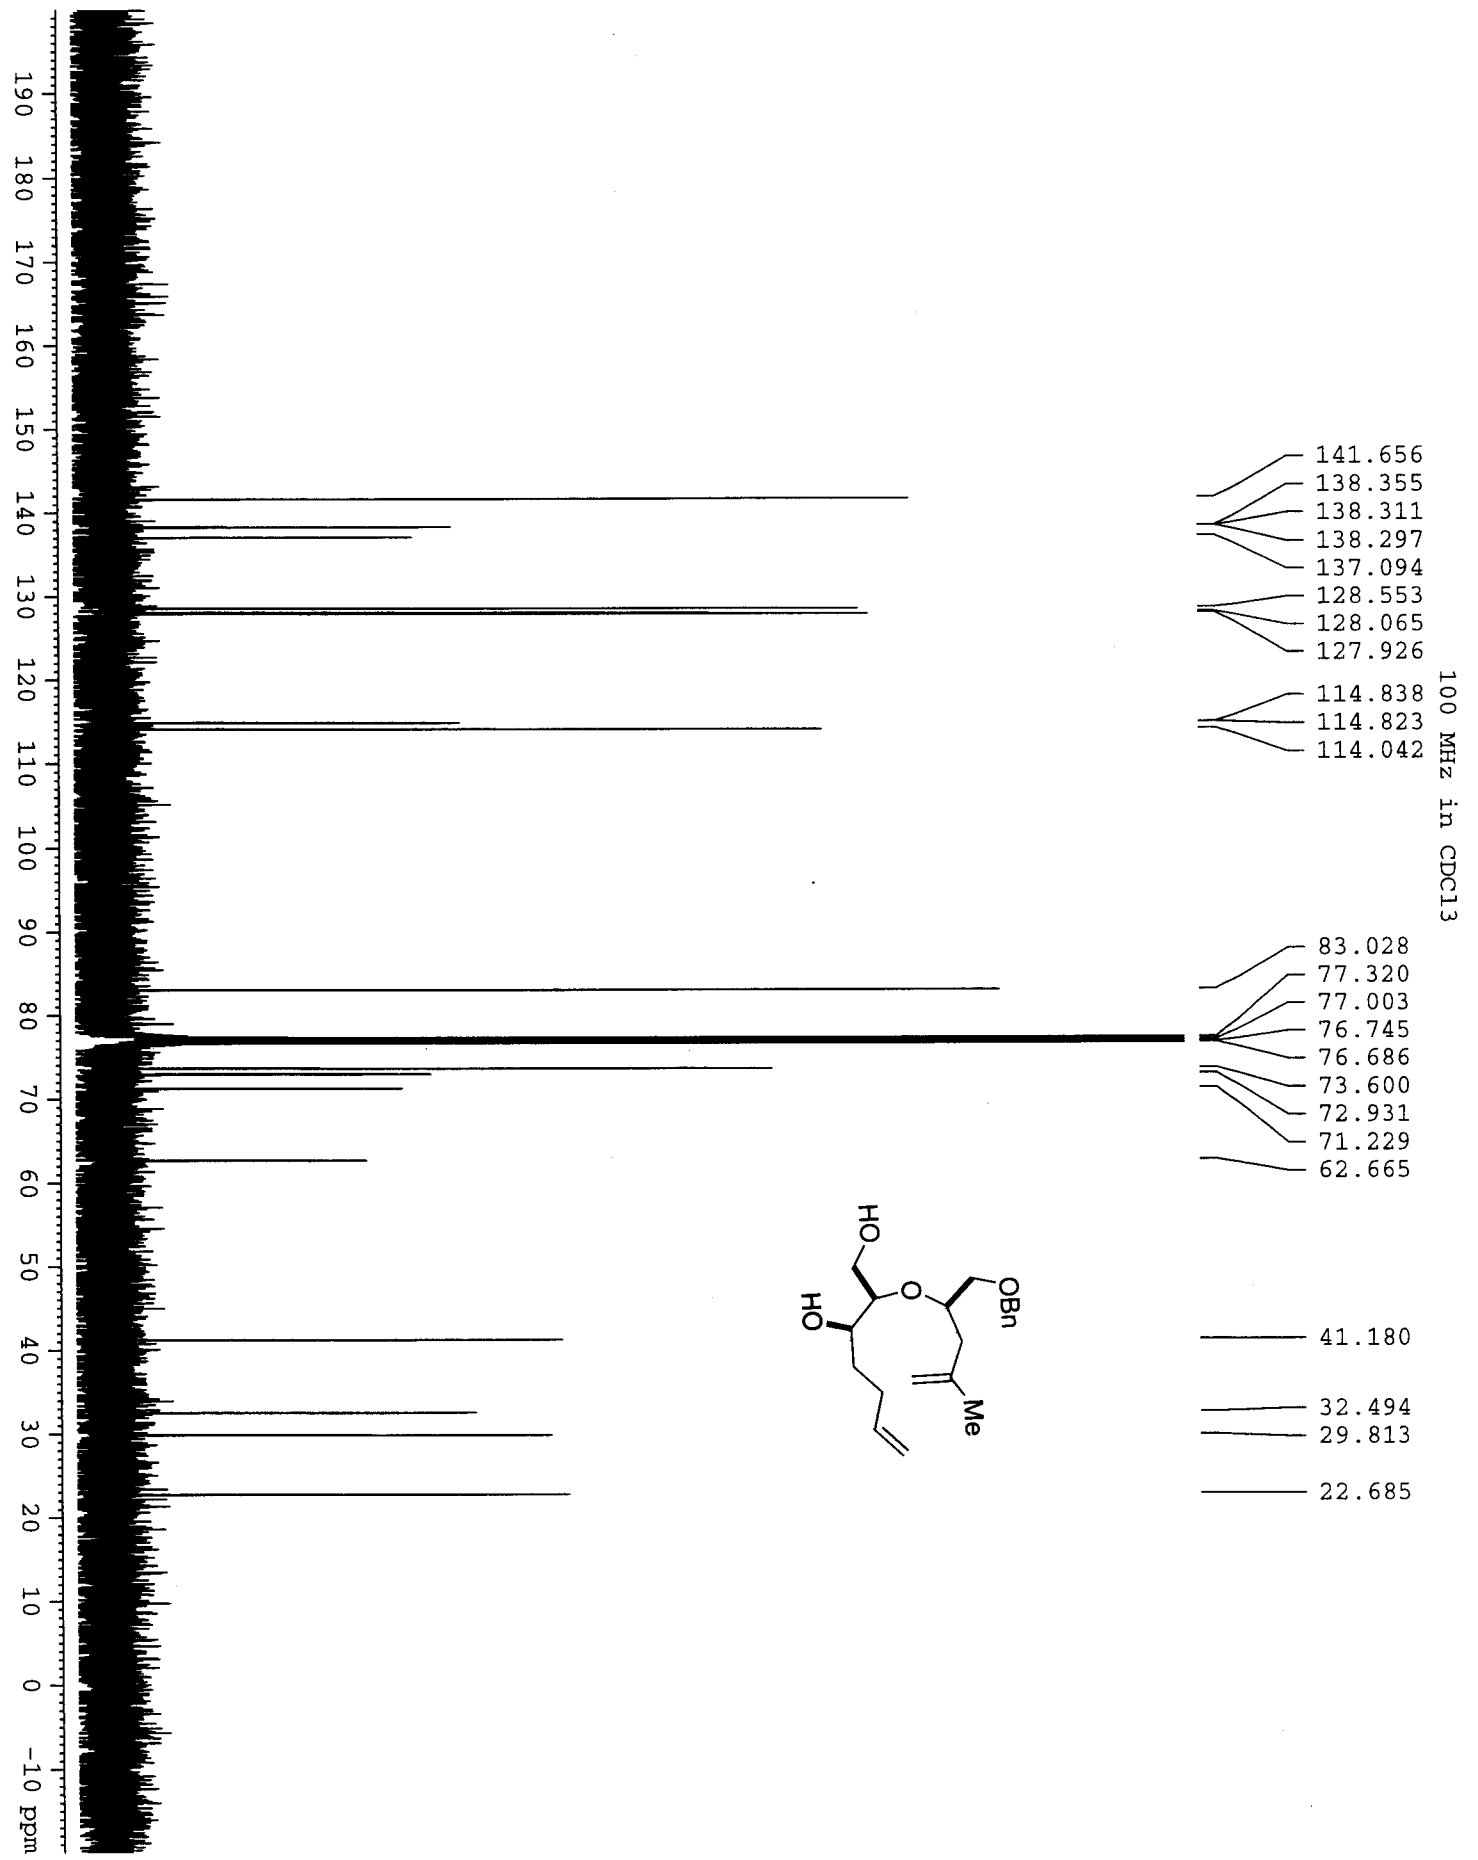

400MHz in CDCl3

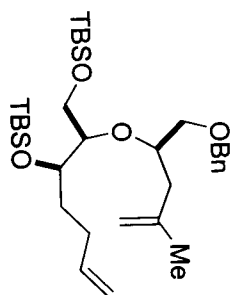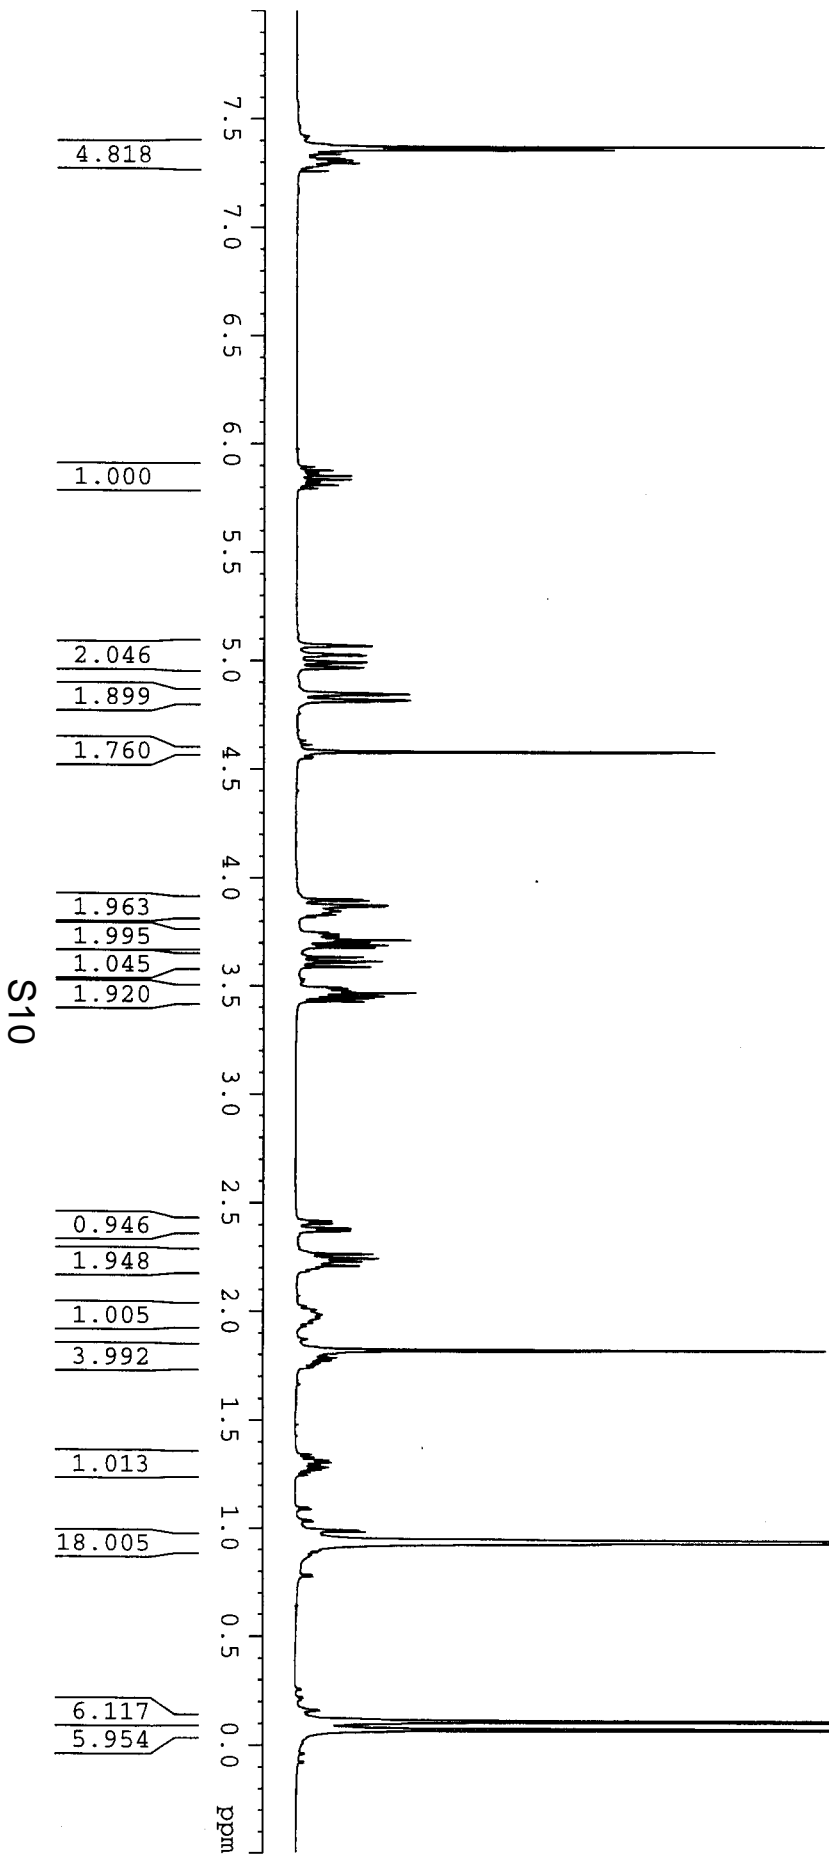

100 MHz in CDCl<sub>3</sub>

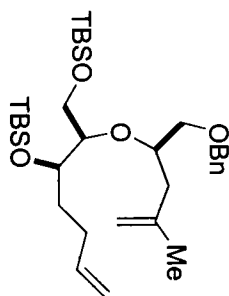

S11

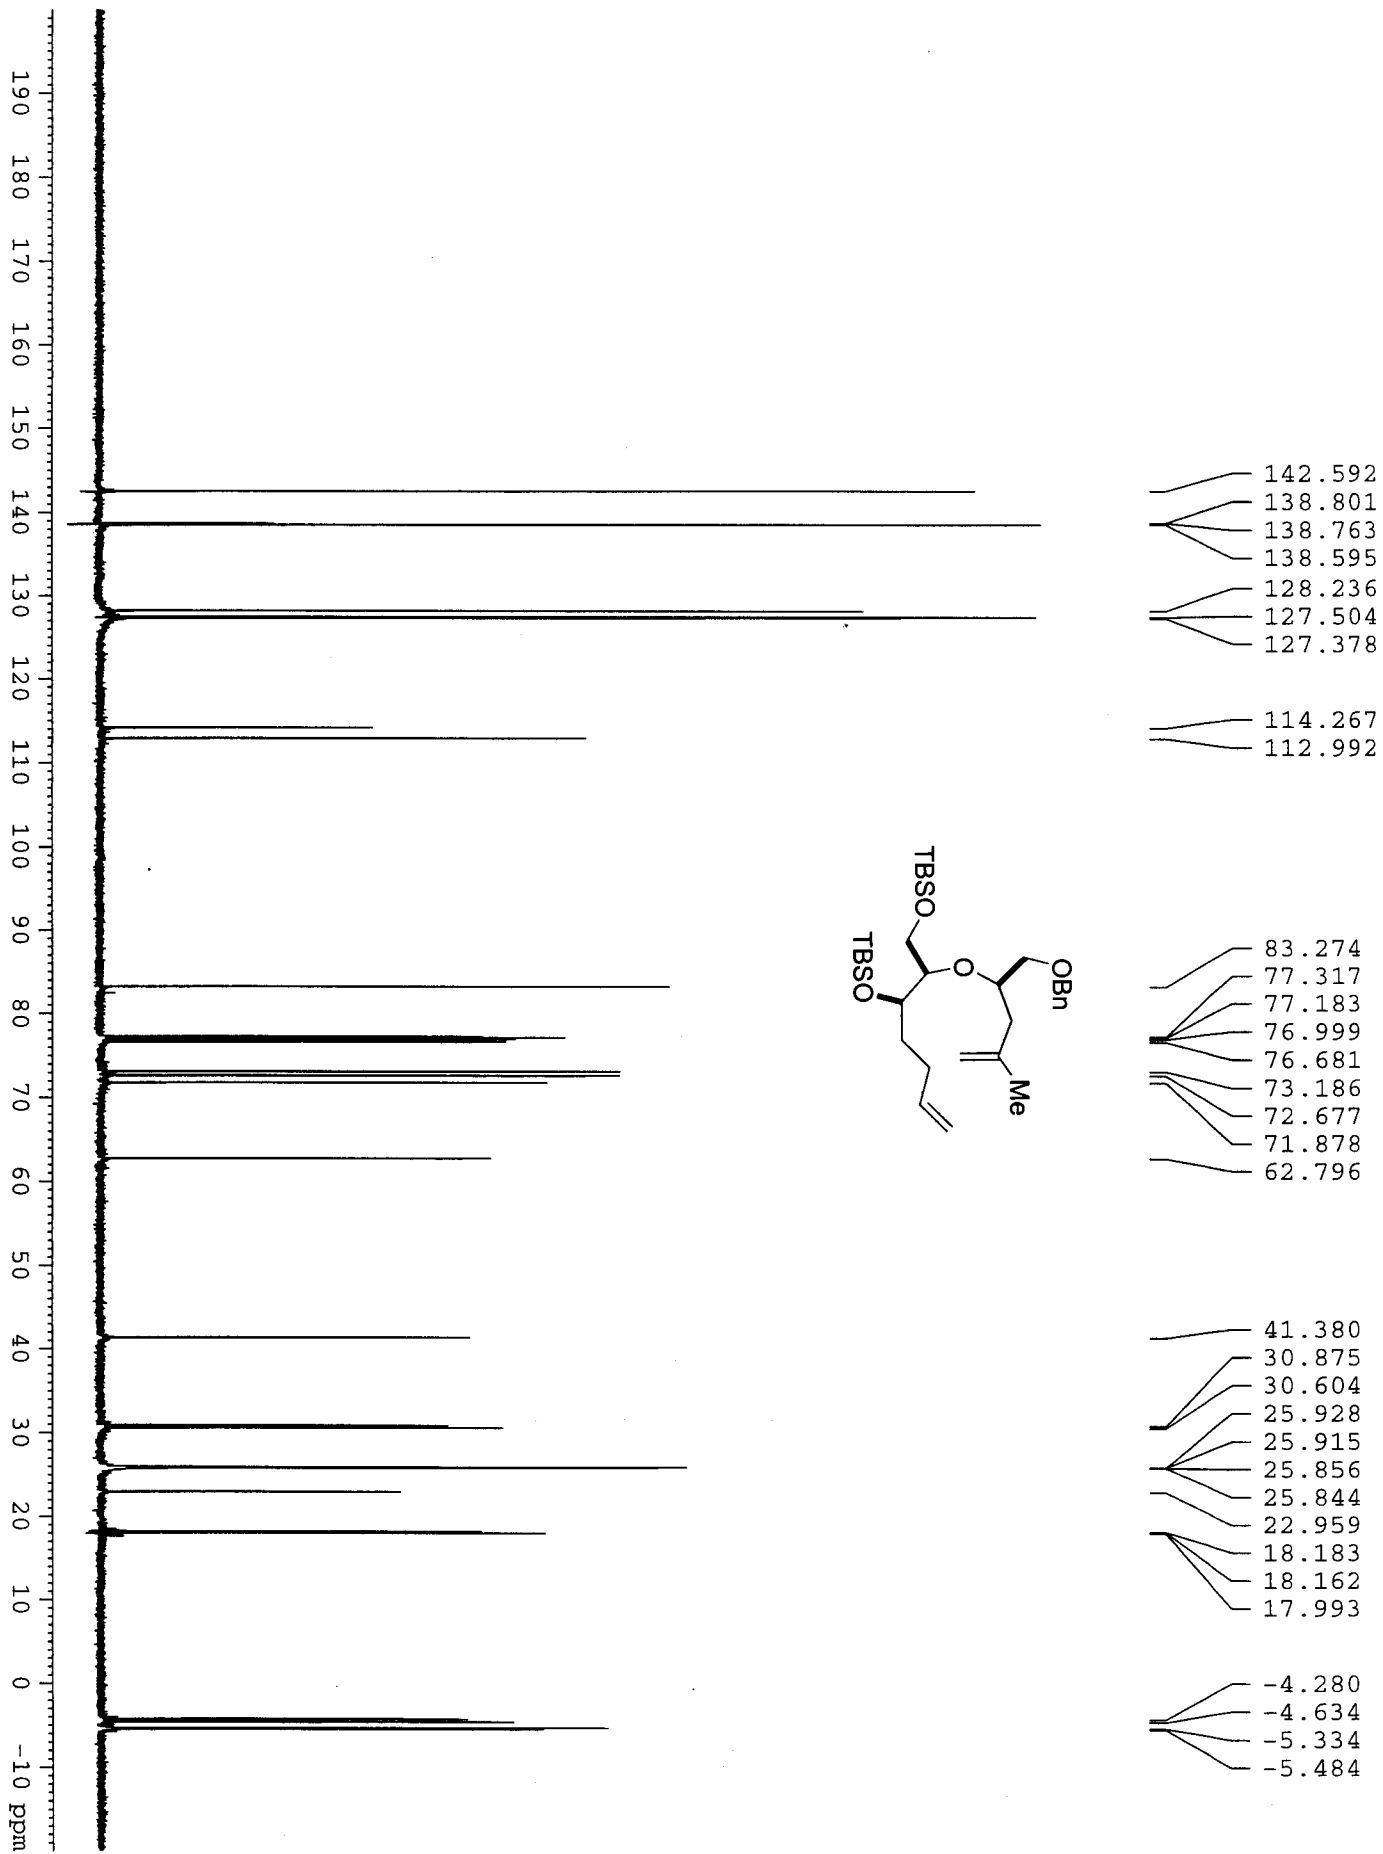

400 MHz in CDCl3

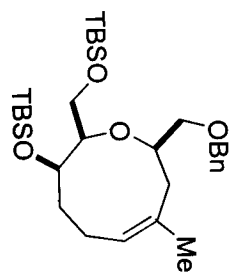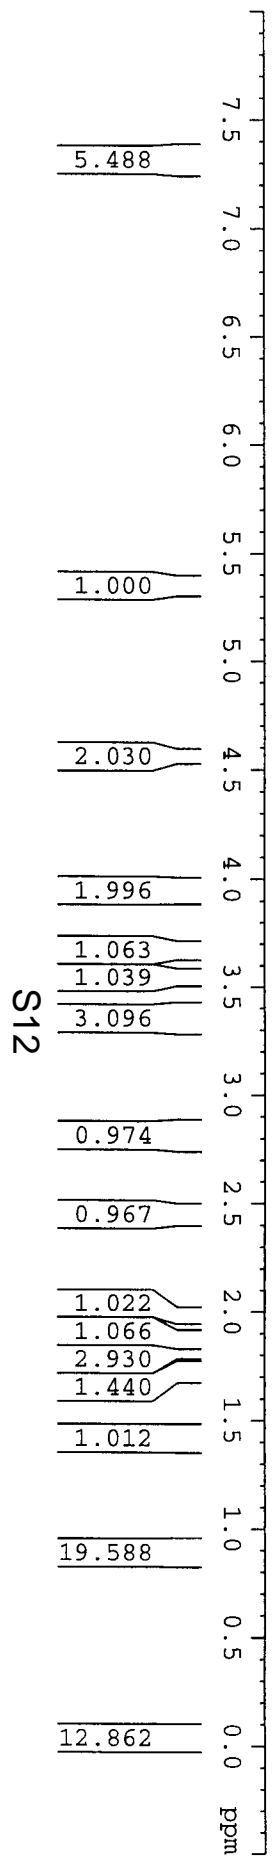

S12

100 MHz in CDCl<sub>3</sub>

S13

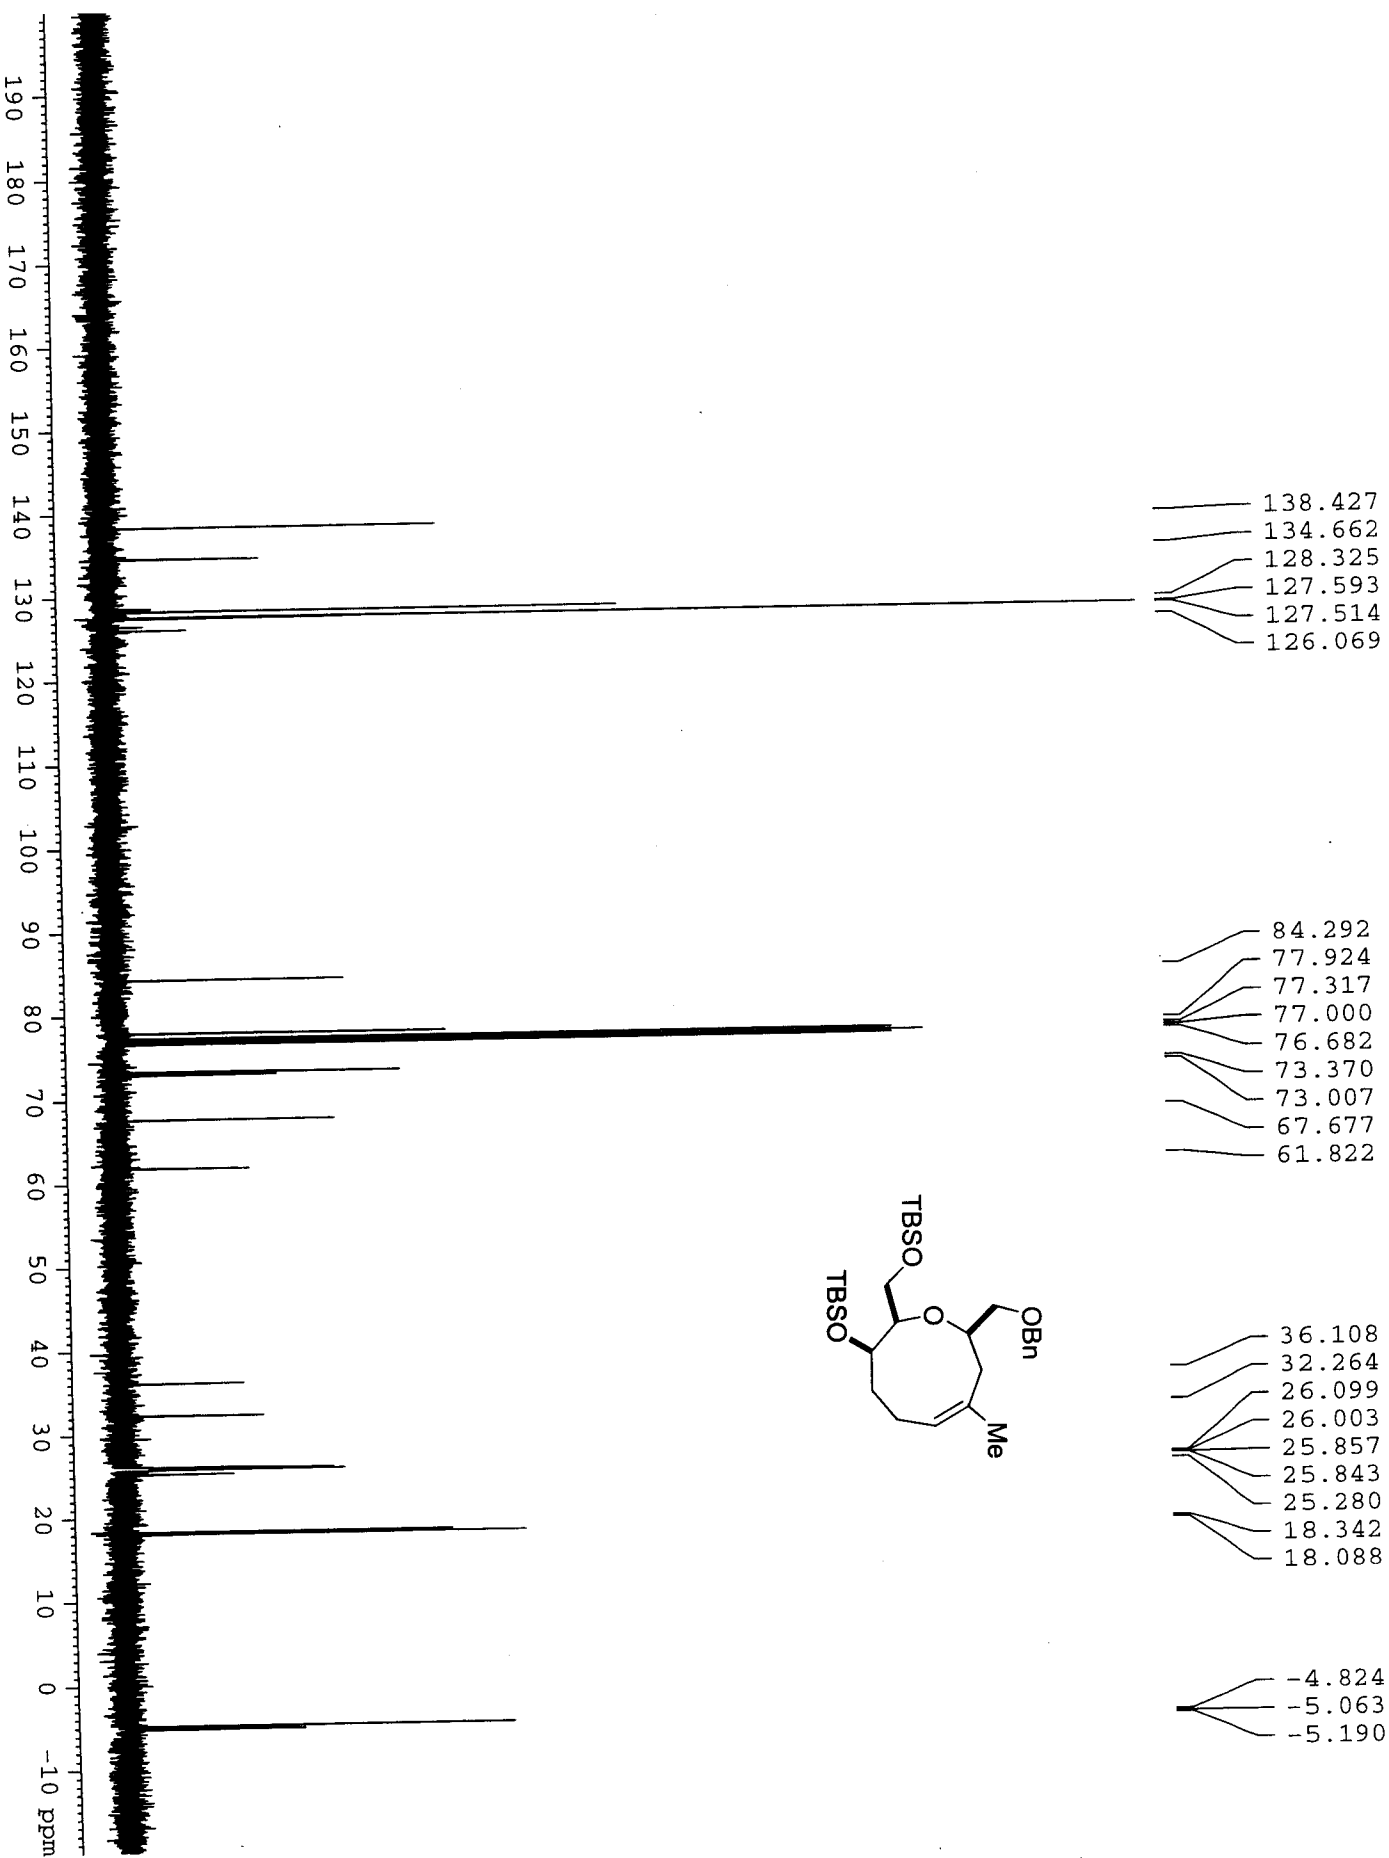

400 MHz in CDCl3

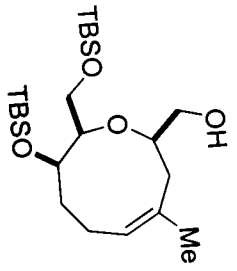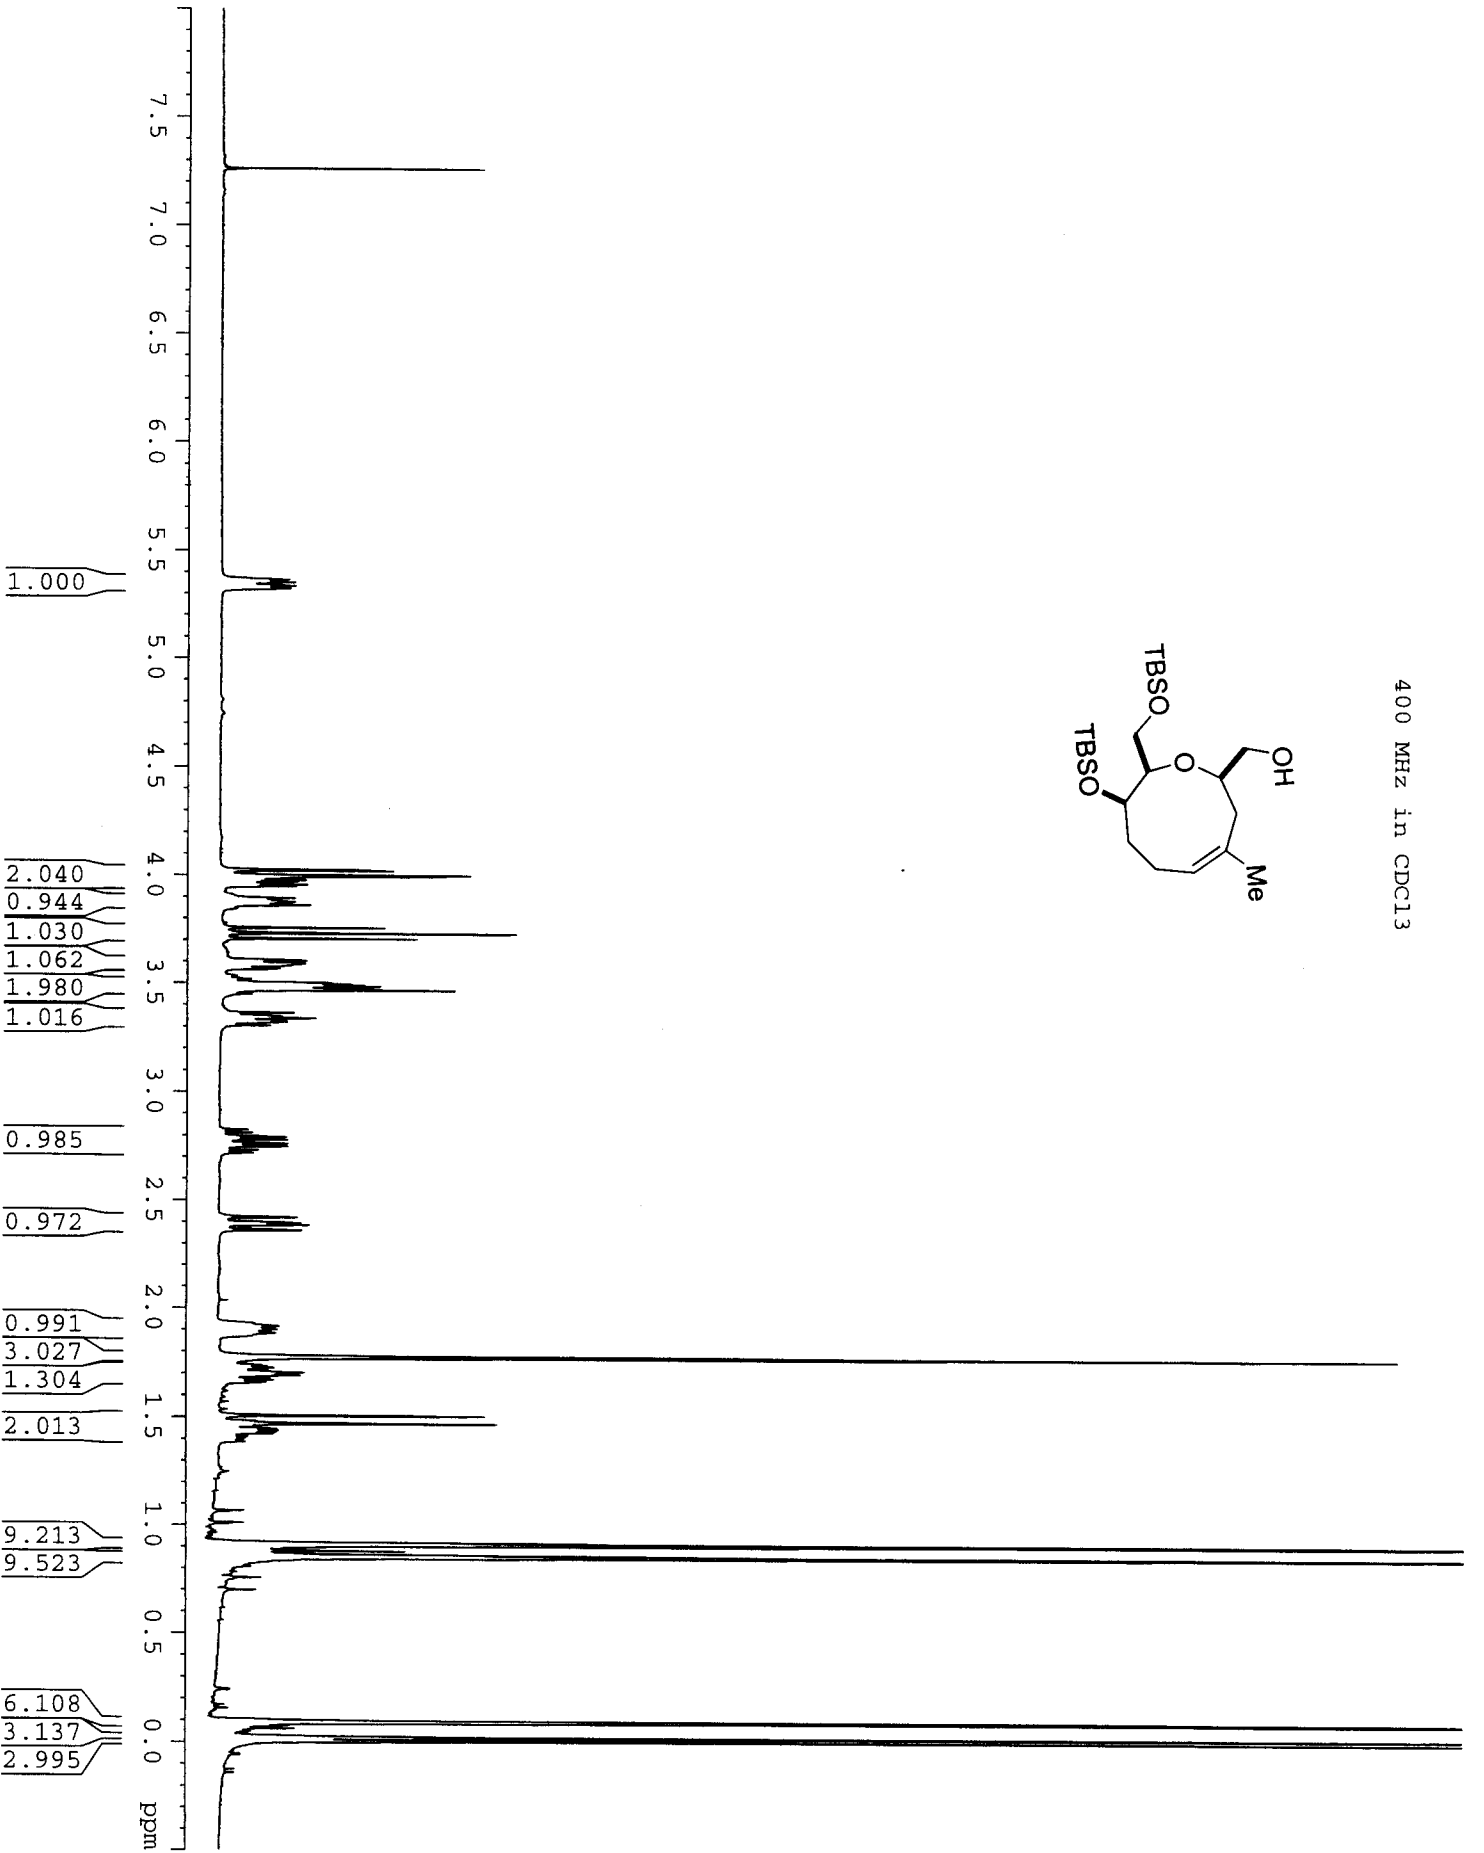

S14

100 MHz in CDCl<sub>3</sub>

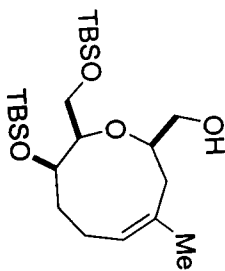

S15

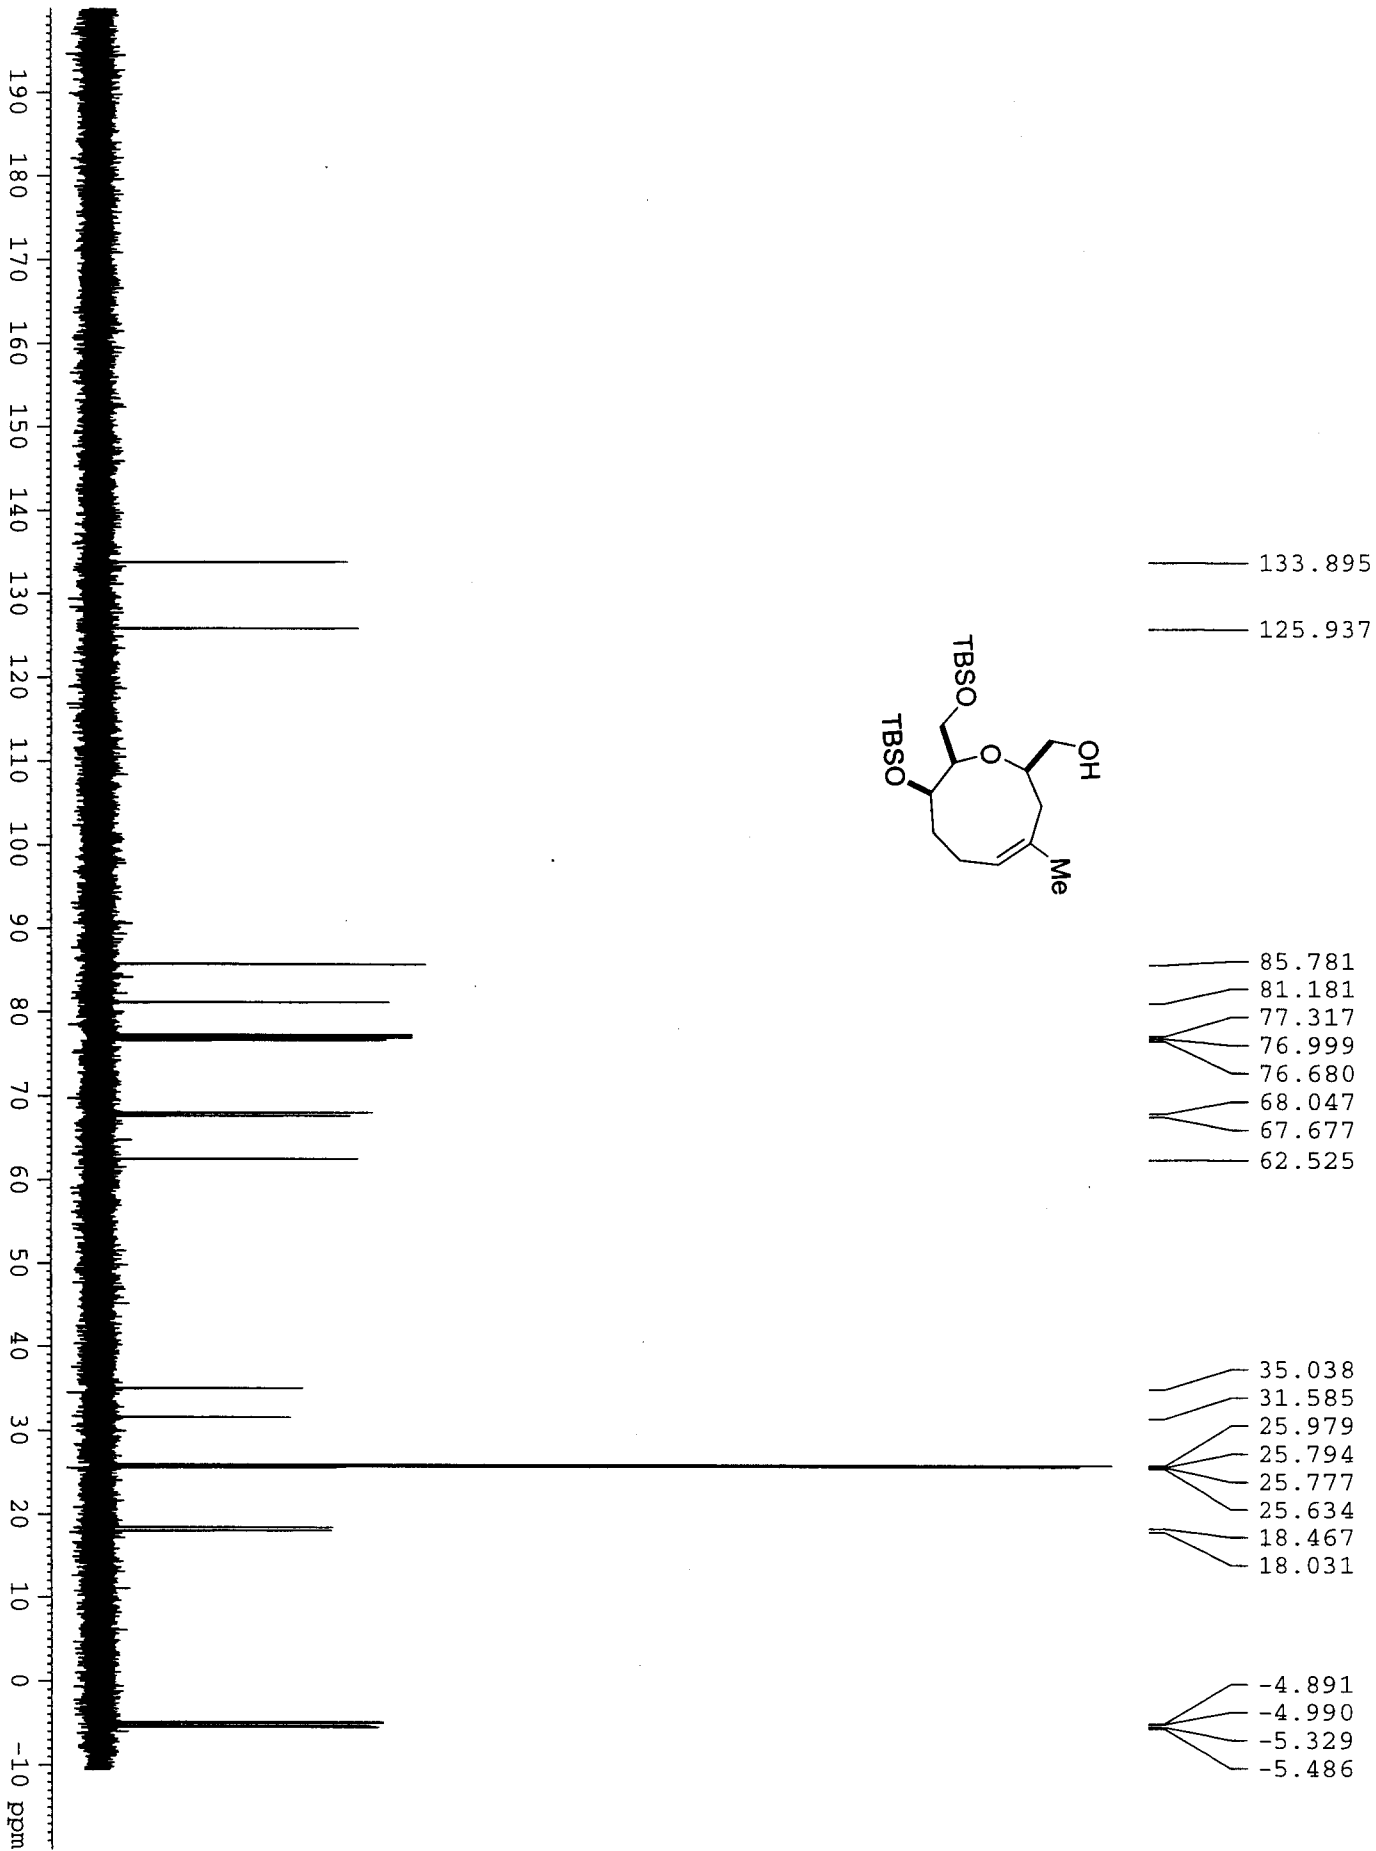

400 MHz in CDCl3

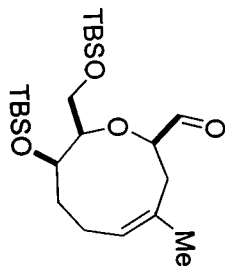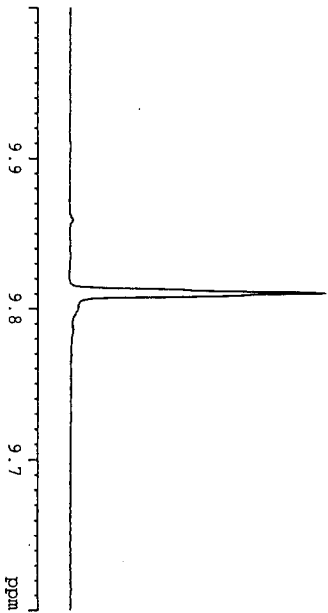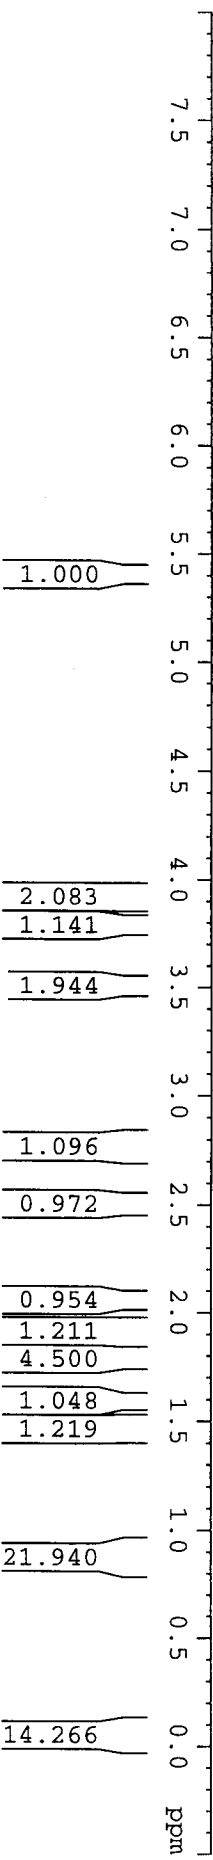

S16



S17

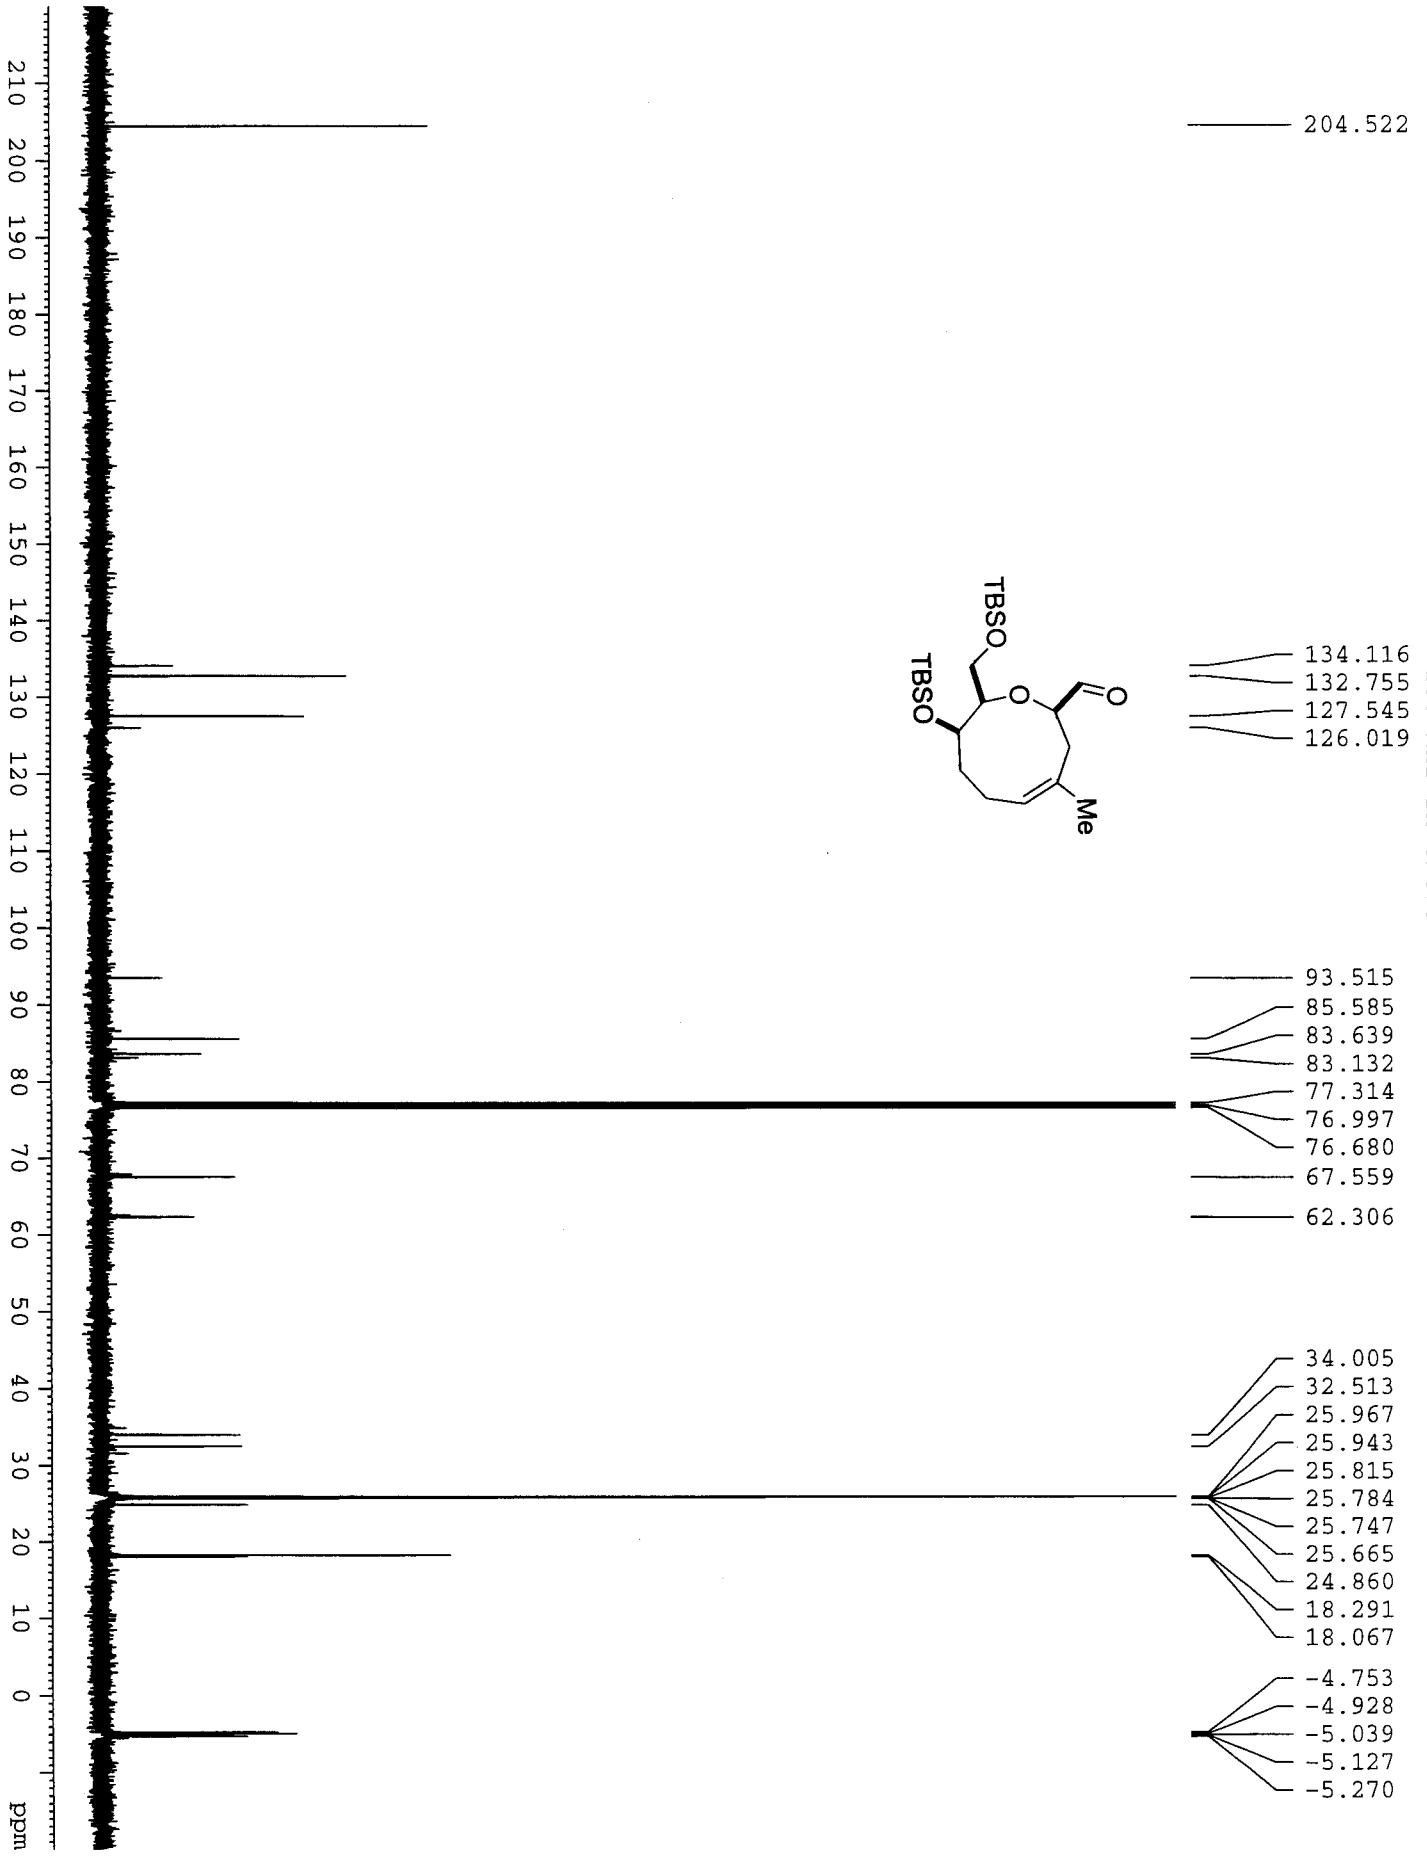

400 MHz in CDCl<sub>3</sub>

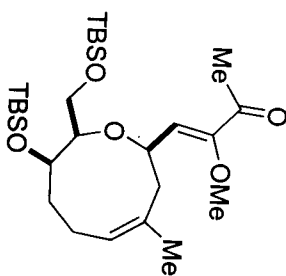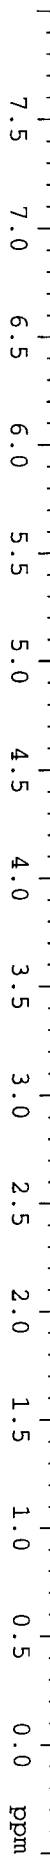

S18

100 MHz in CDCl<sub>3</sub>

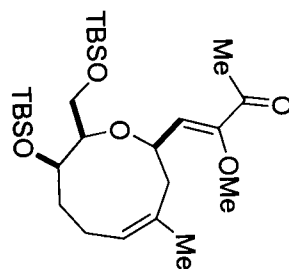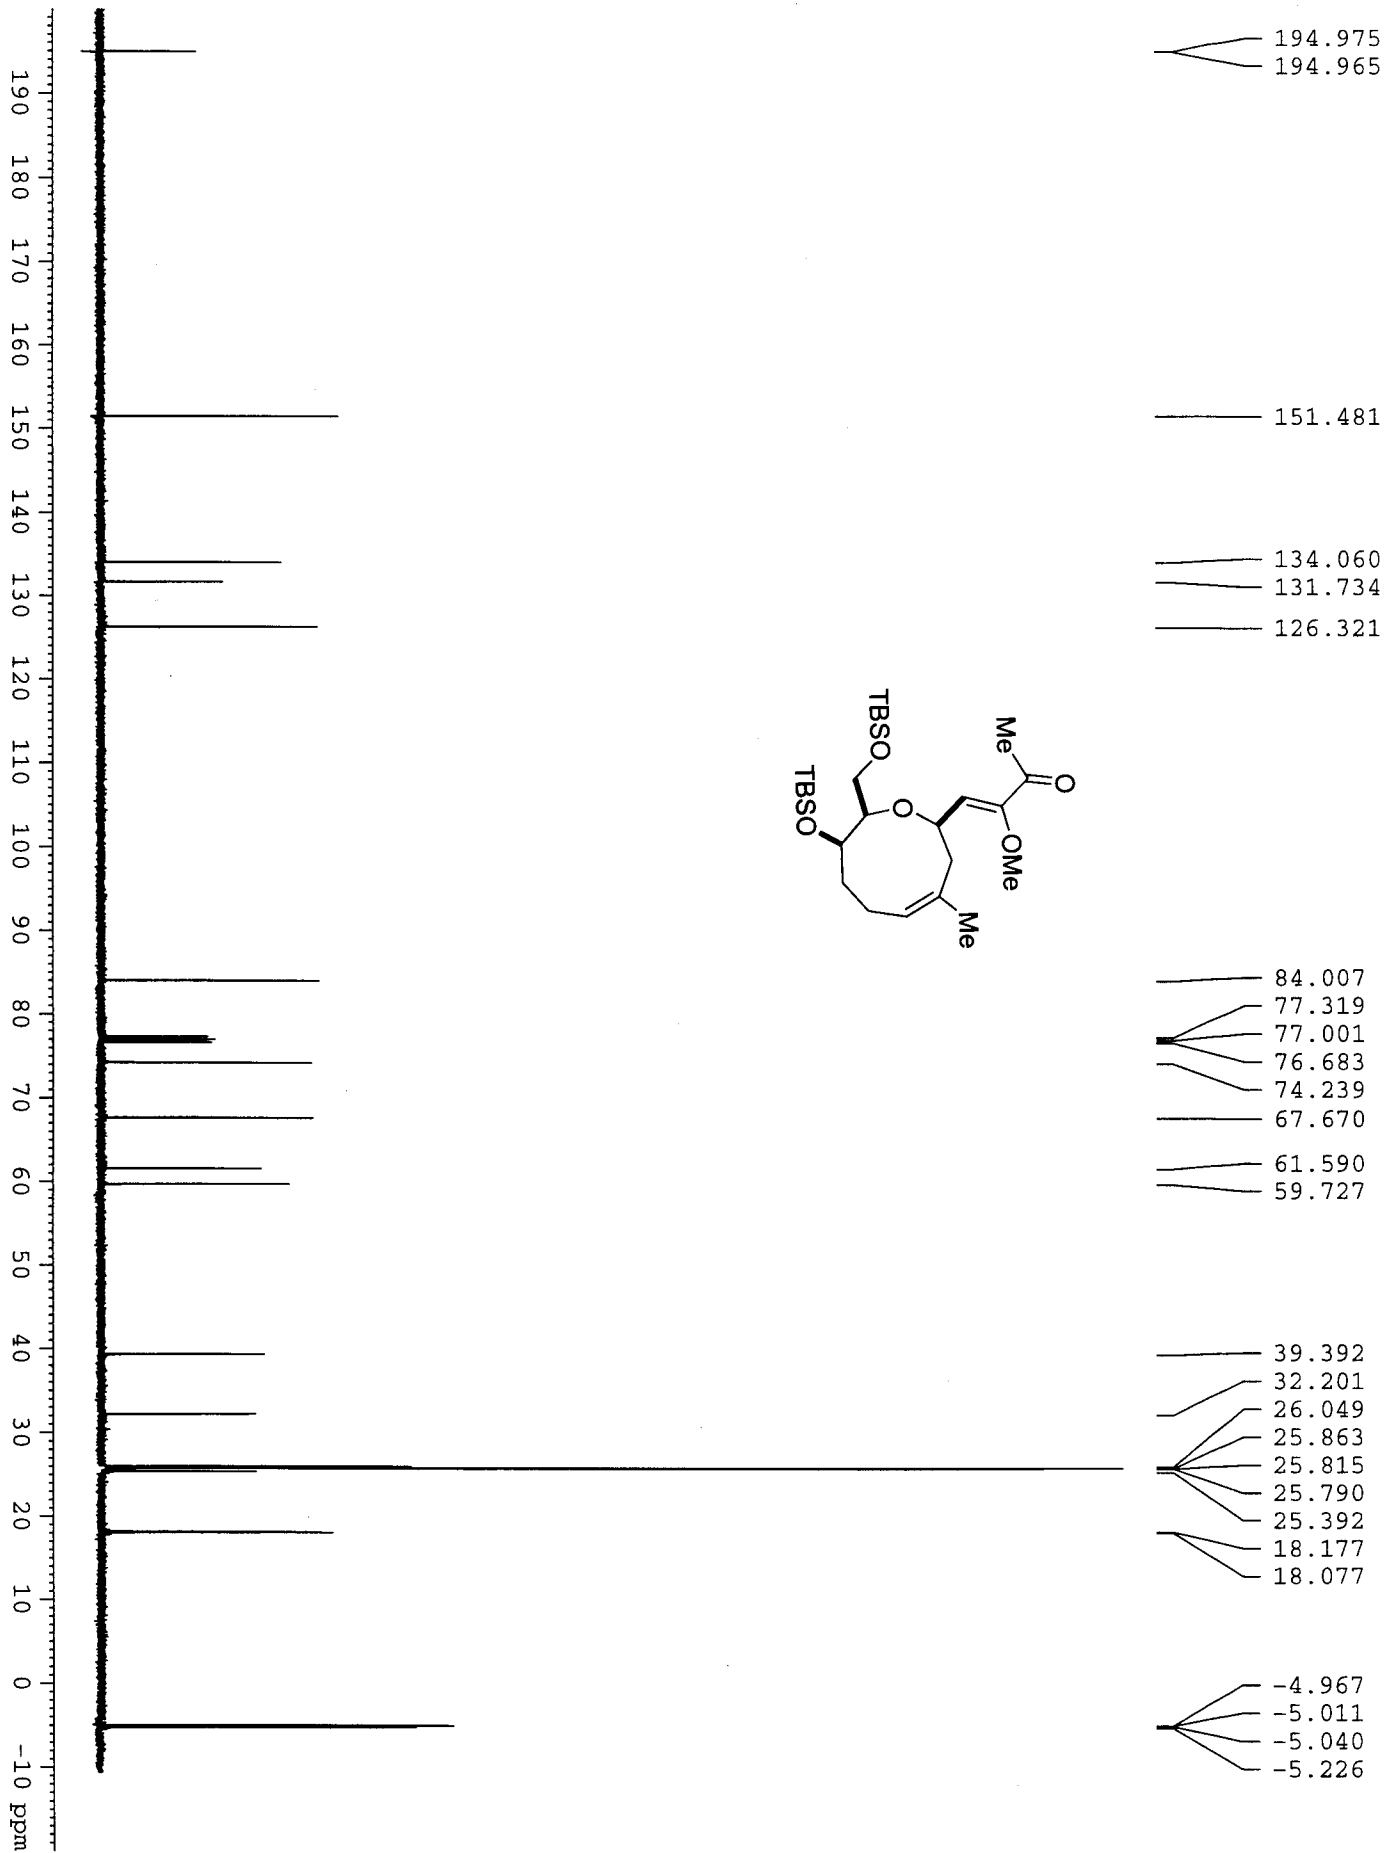

S19

400 MHz in CDCl<sub>3</sub>

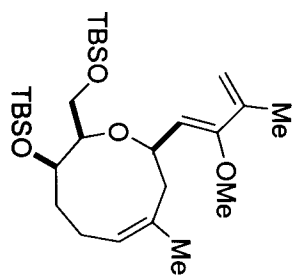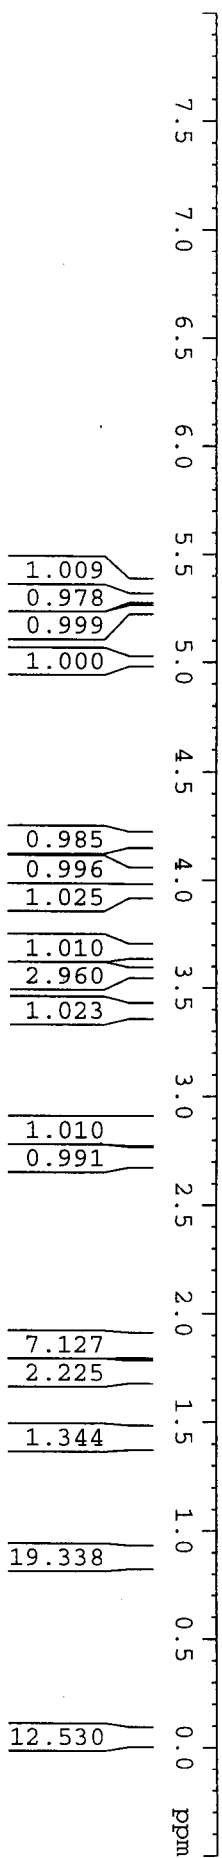

S20

100 MHz in CDCl<sub>3</sub>

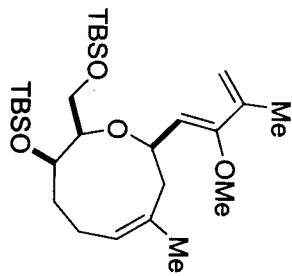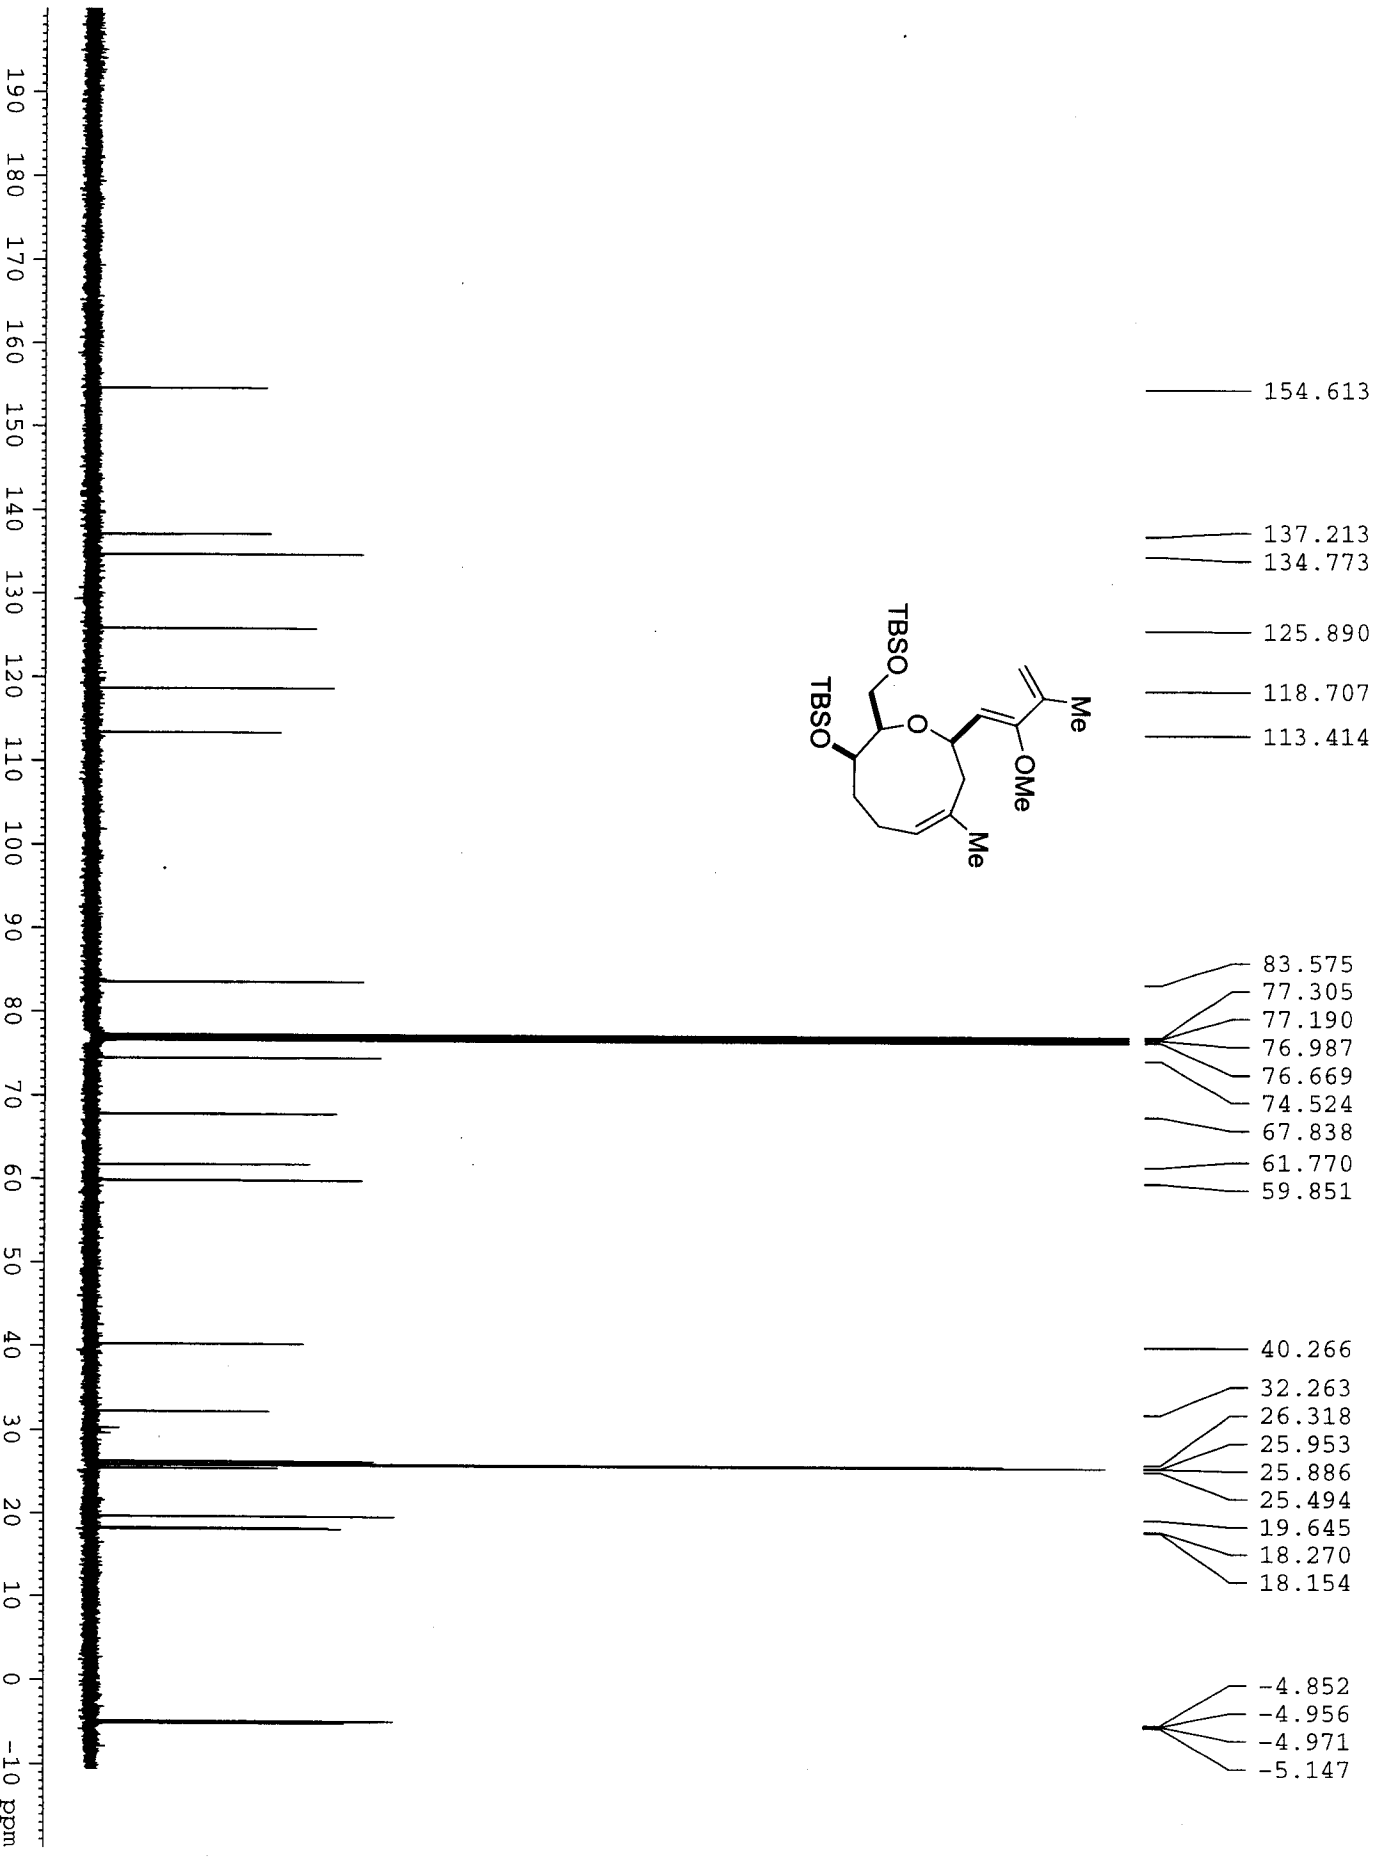

S21

400 MHz in CDCl<sub>3</sub>

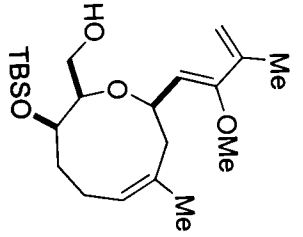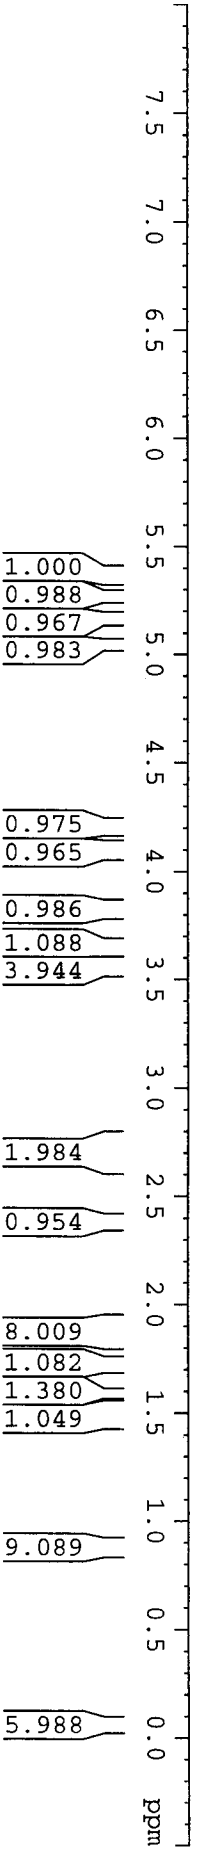

S22

100 MHz in CDCl<sub>3</sub>

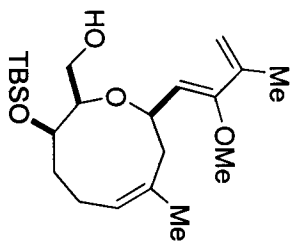

S23

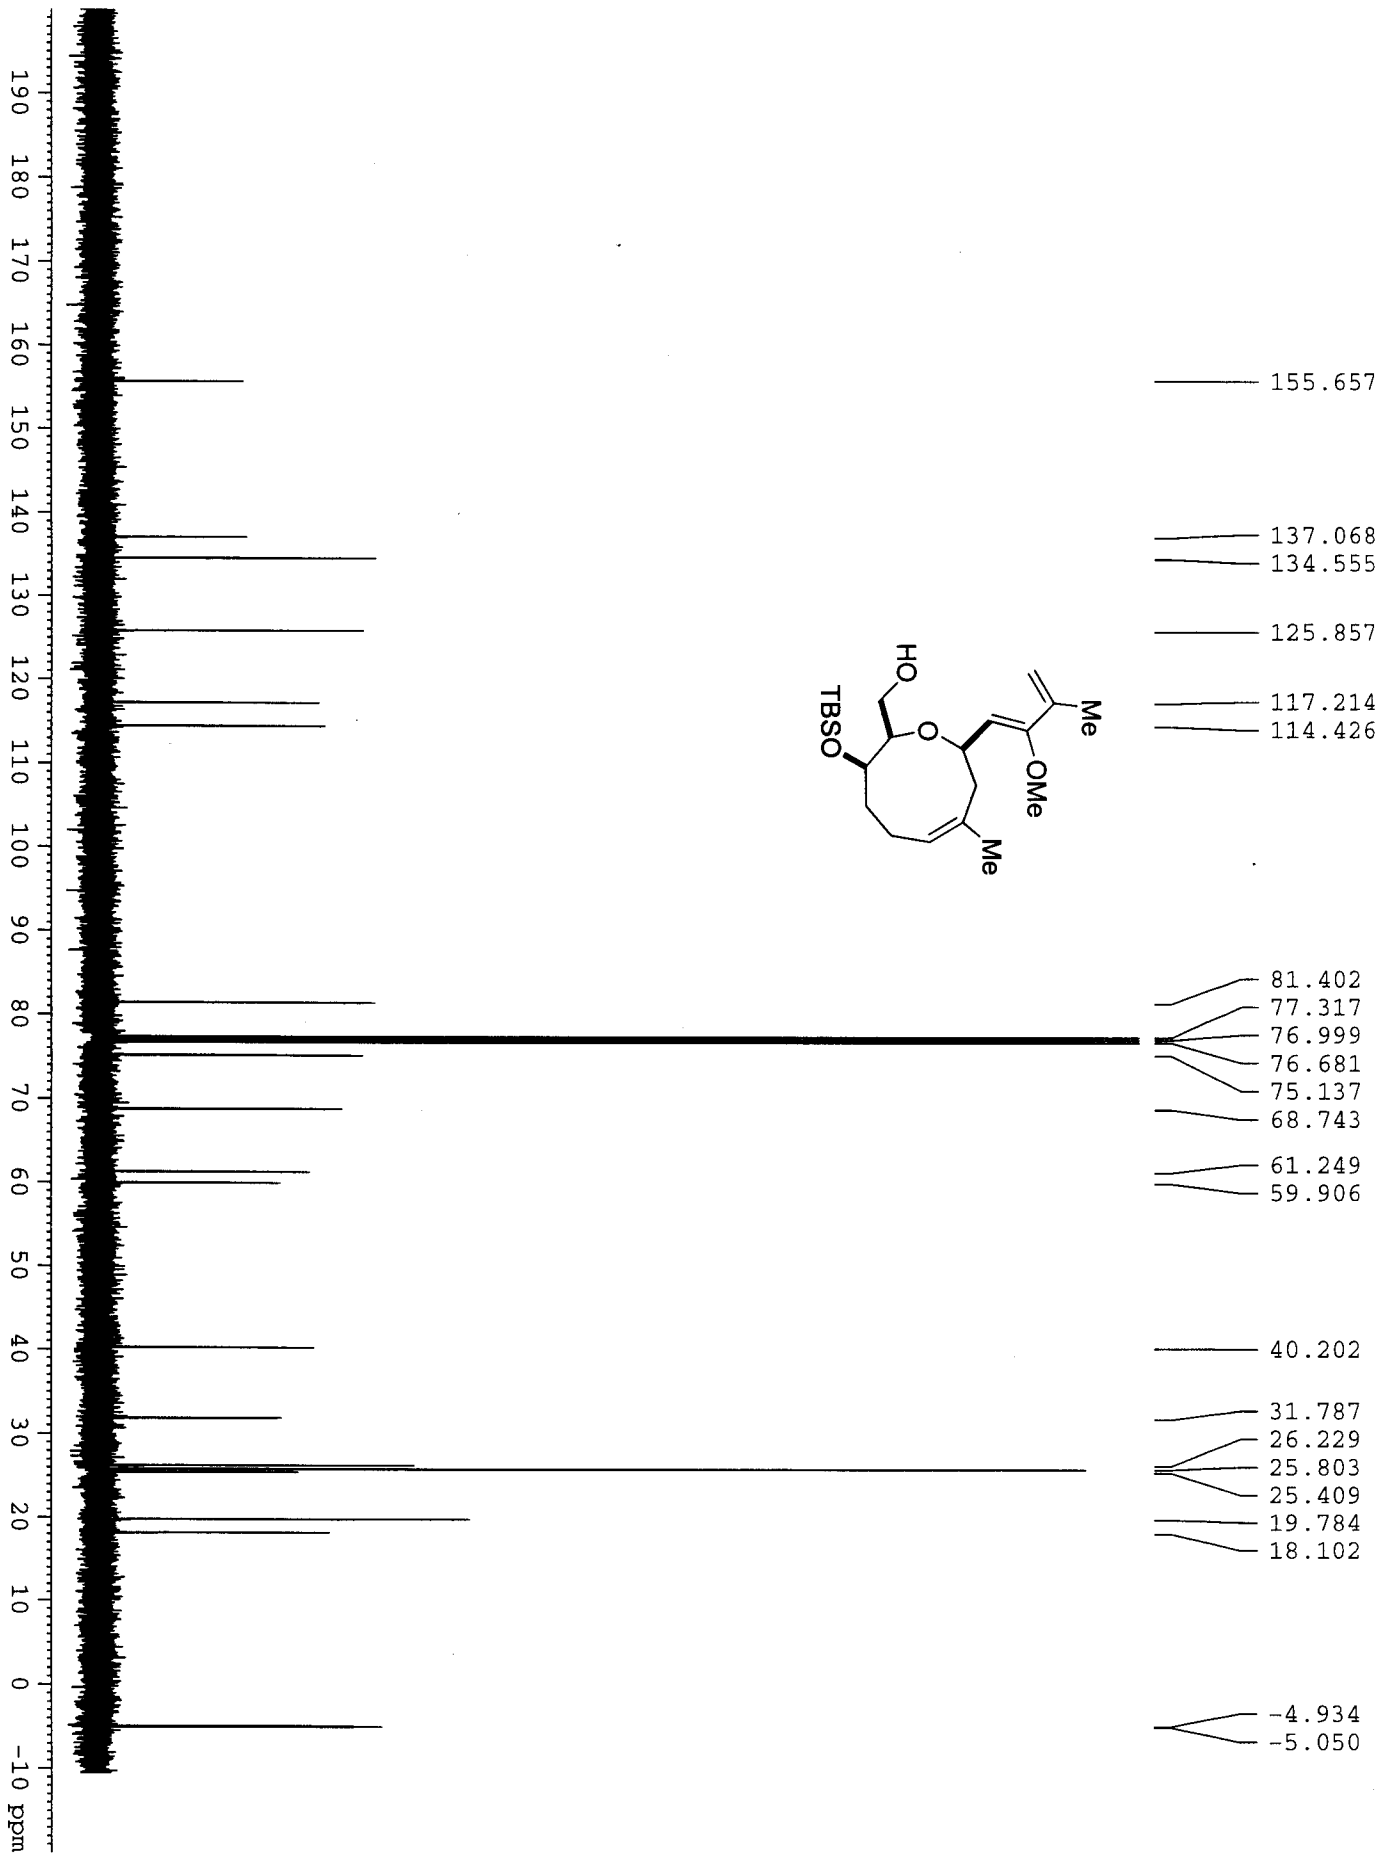

400 MHz in CDCl<sub>3</sub>

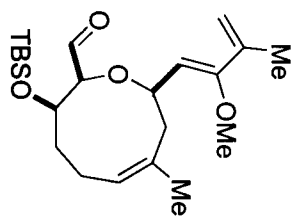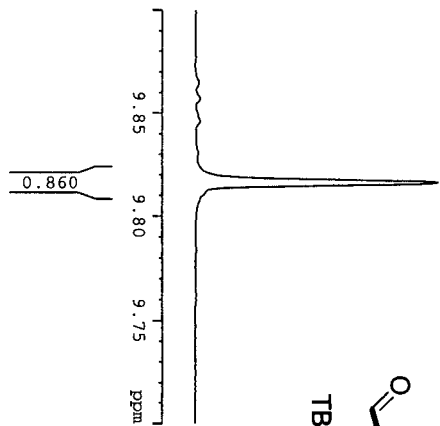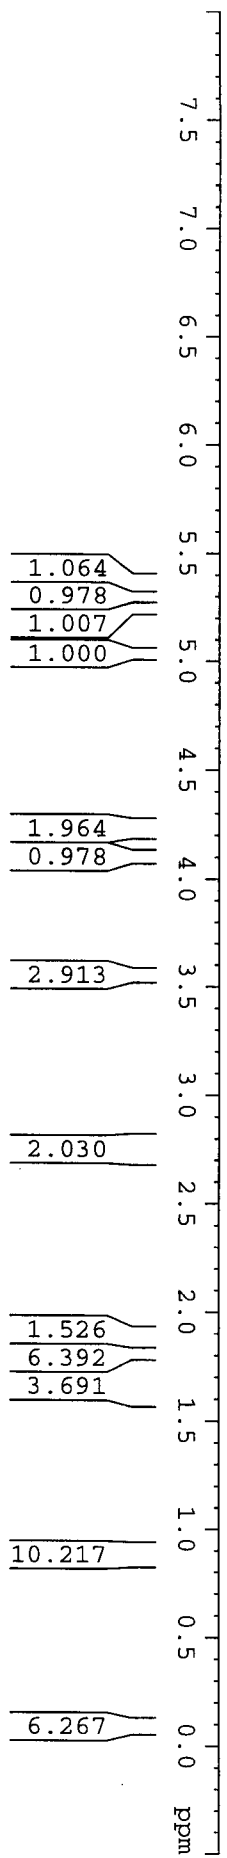

S24



100 MHz in CDCl<sub>3</sub>

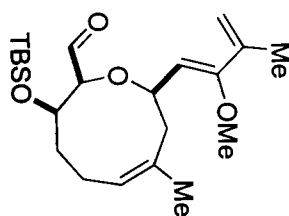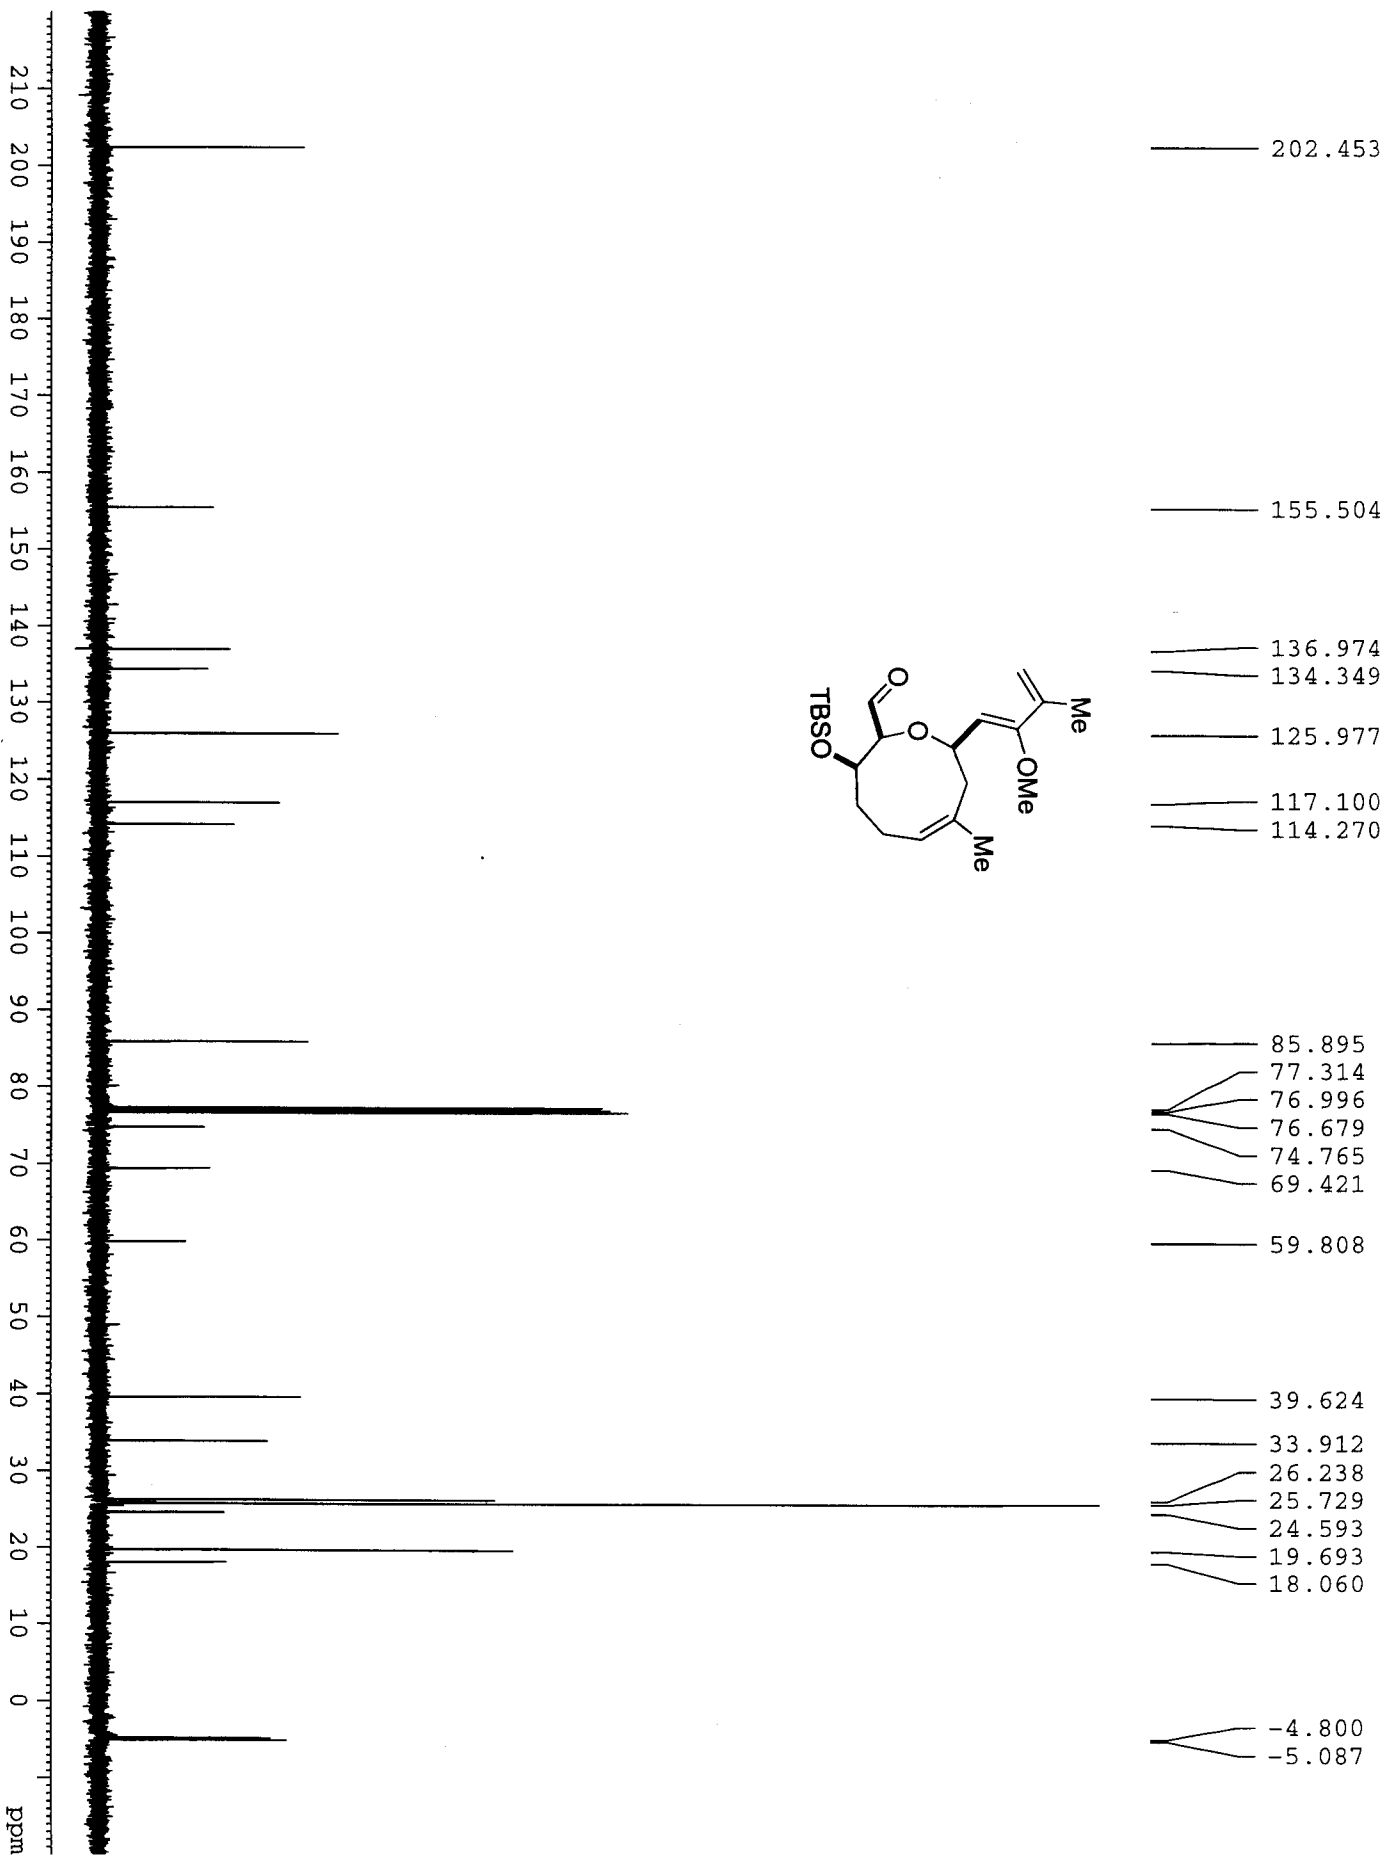

S25

400 MHz in C6D6 at 333K

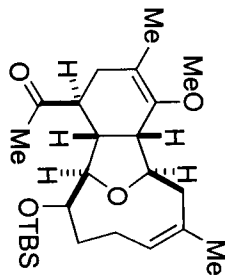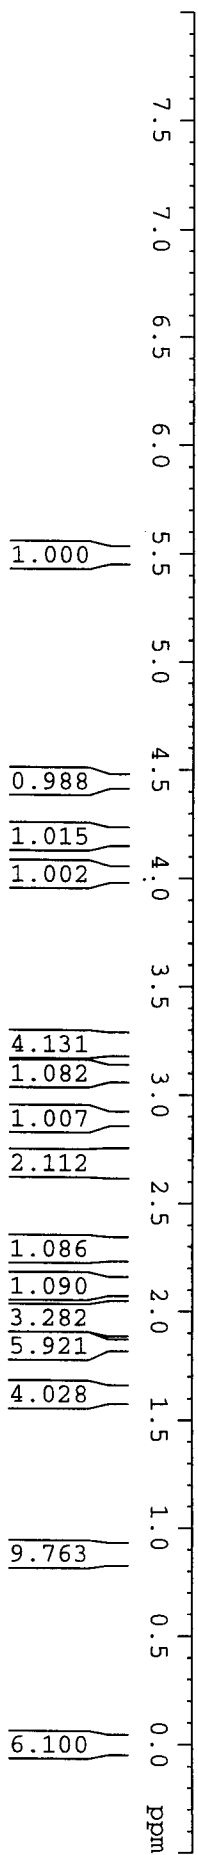

S26

100 MHz in C6D6 at 333K

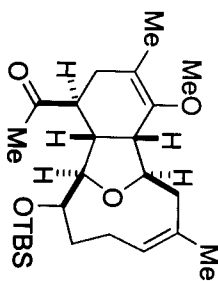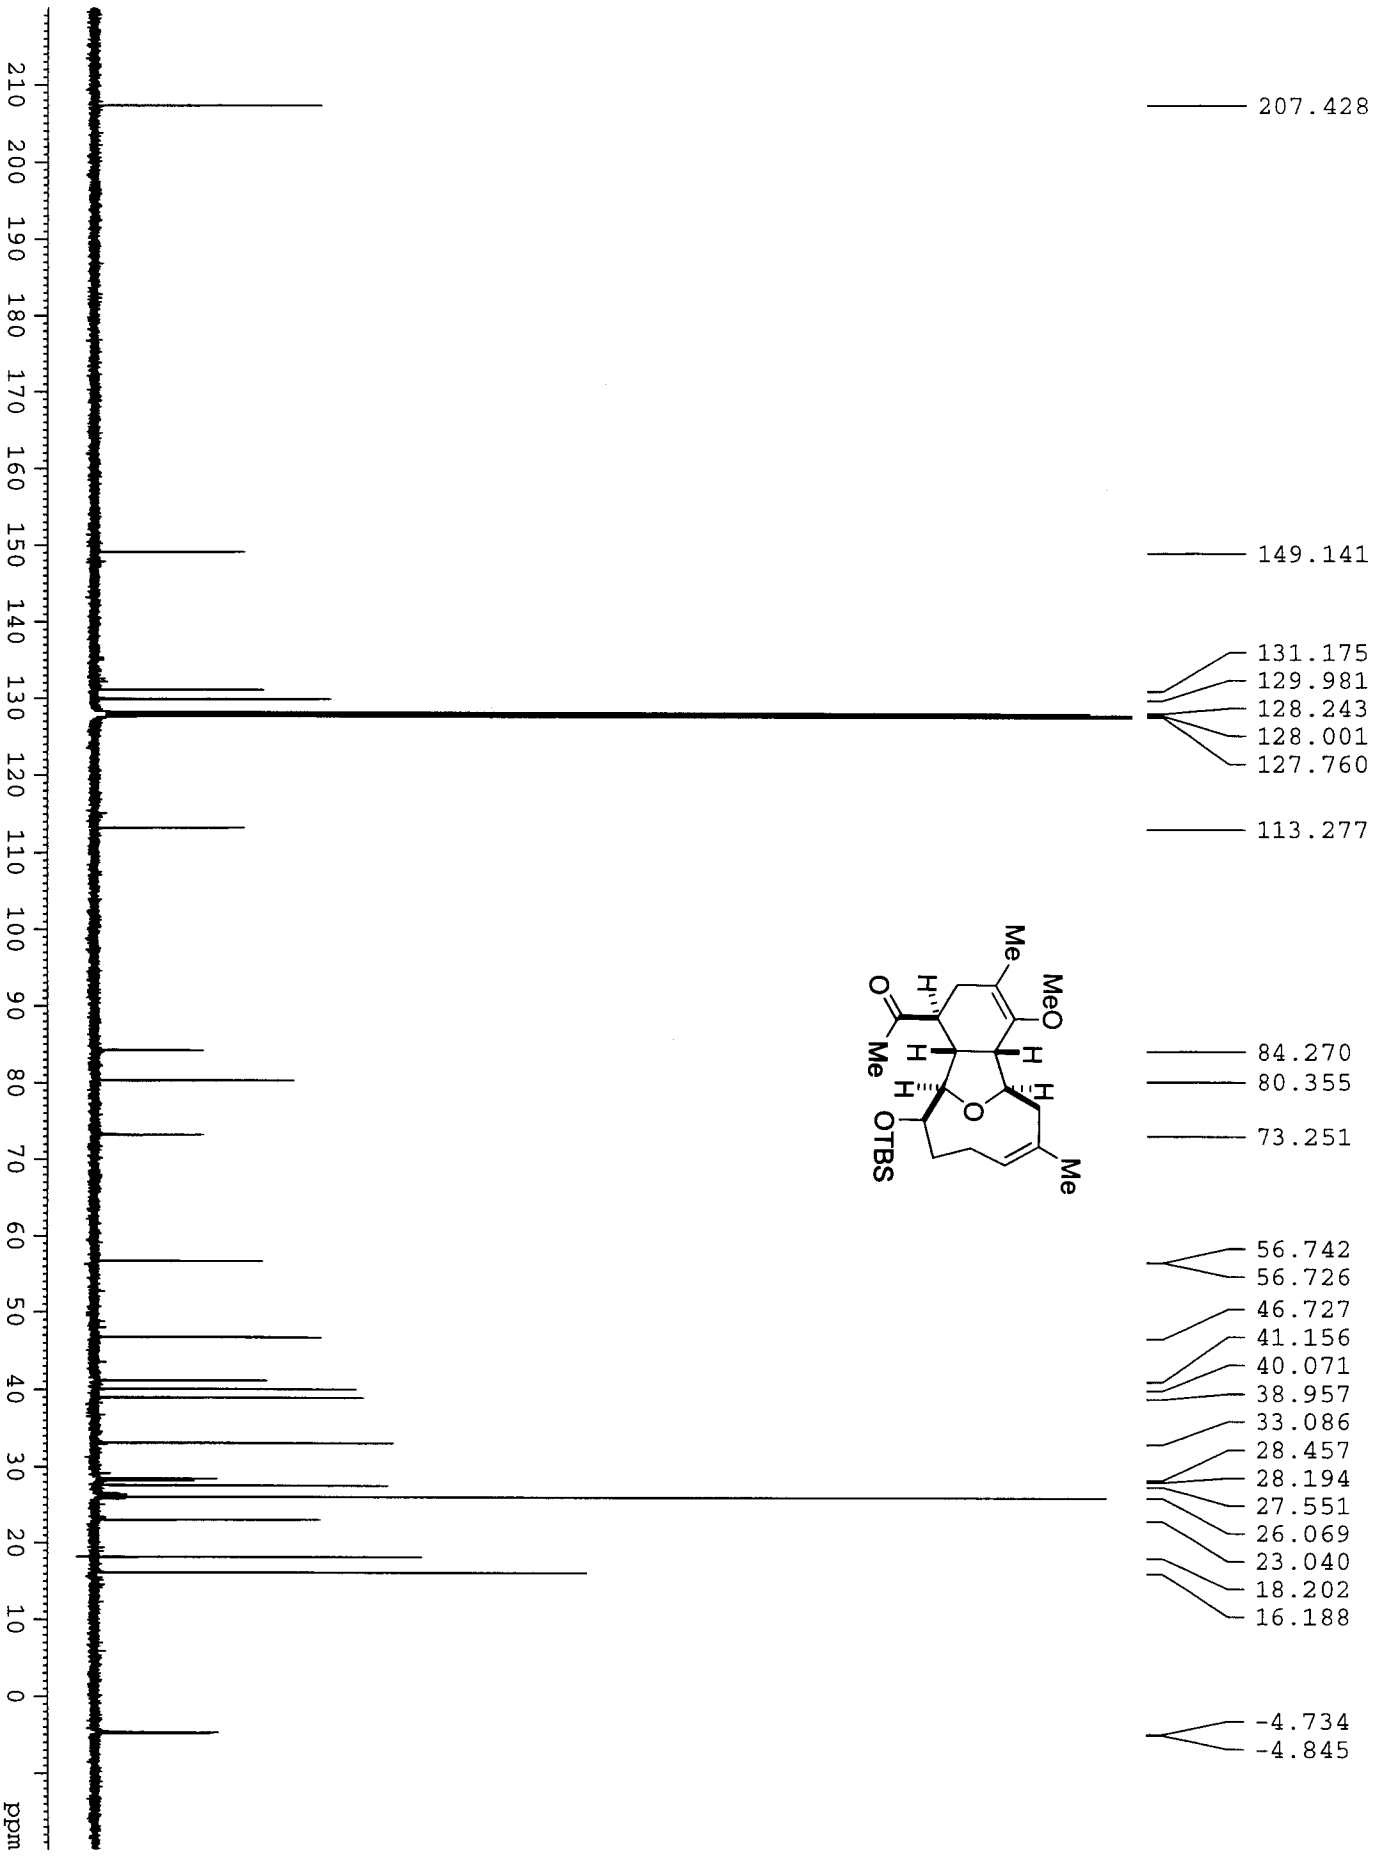

S27

400 MHz in CDCl<sub>3</sub> at 333K

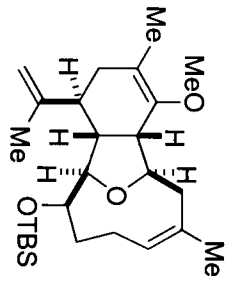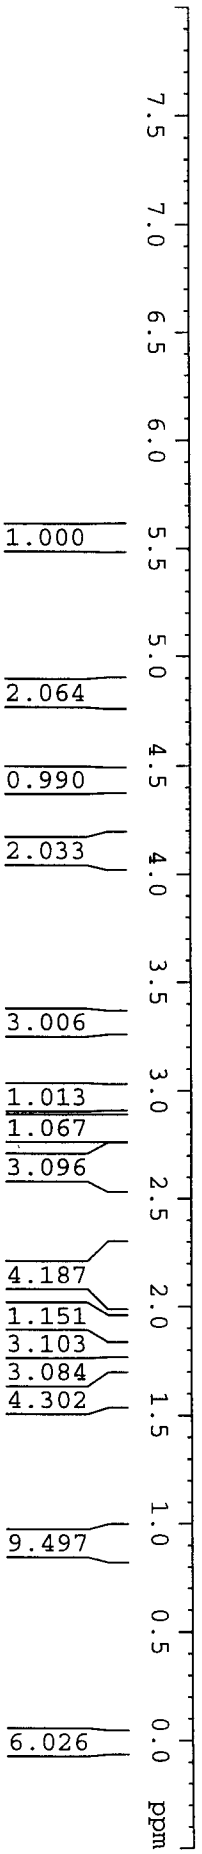

S28

100 MHz in C6D6 at 333K

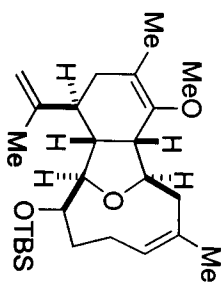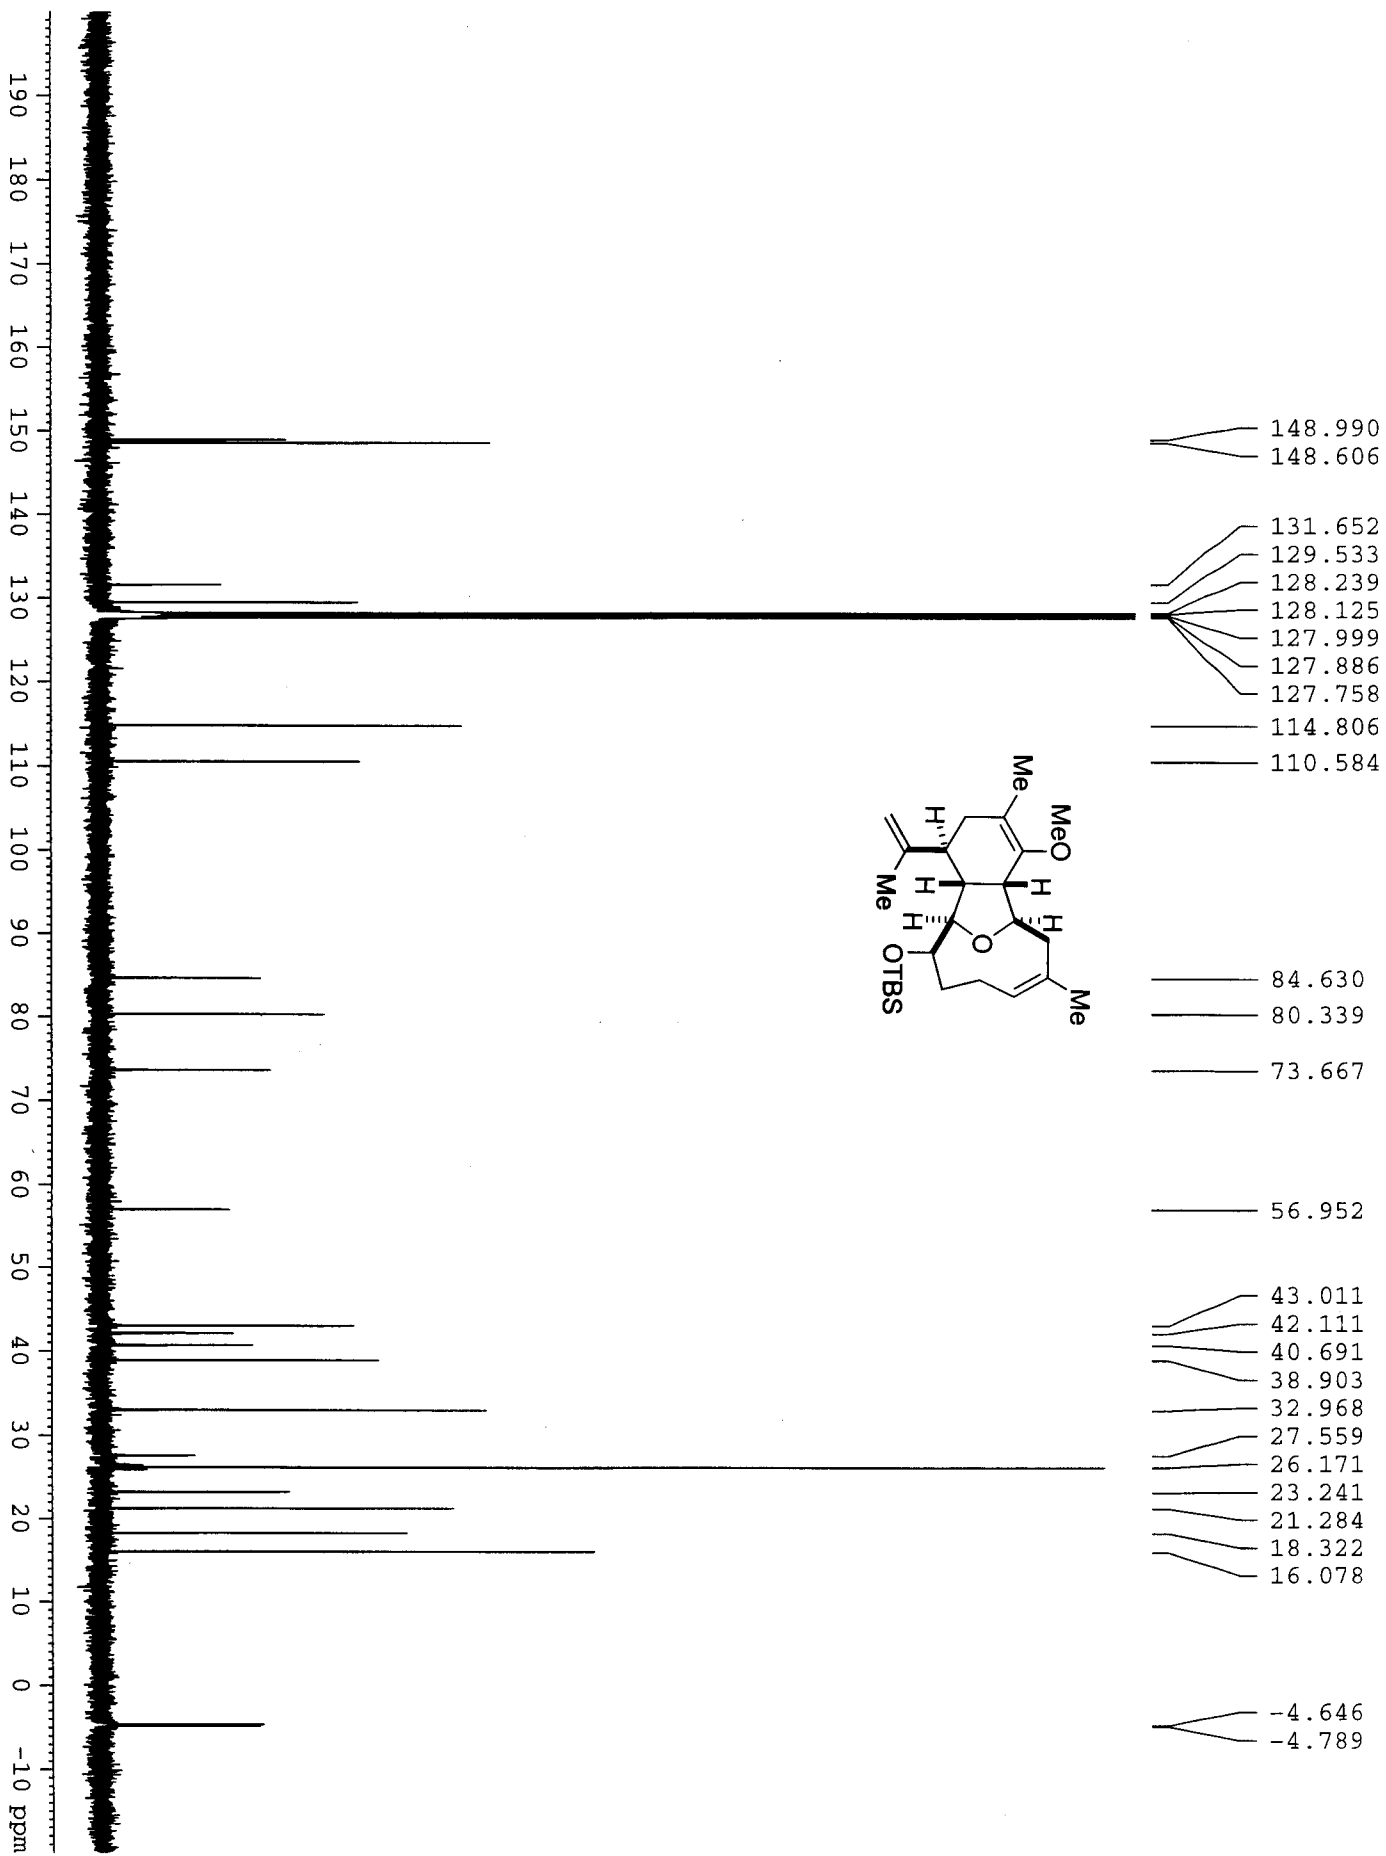

S29

400 MHz in CDCl<sub>3</sub> at 333K

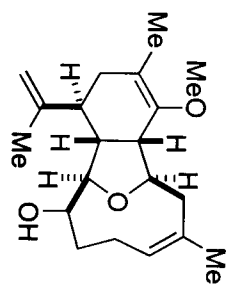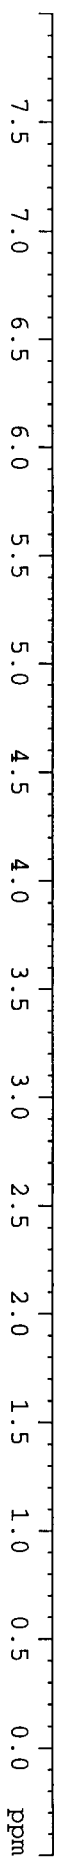

- 1.000
- 2.077
- 1.011
- 1.018
- 1.028
- 3.025
- 1.083
- 2.086
- 1.042
- 1.021
- 2.223
- 3.134
- 5.451
- 6.232

S30

100 MHz in C6D6 at 333K

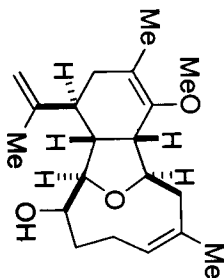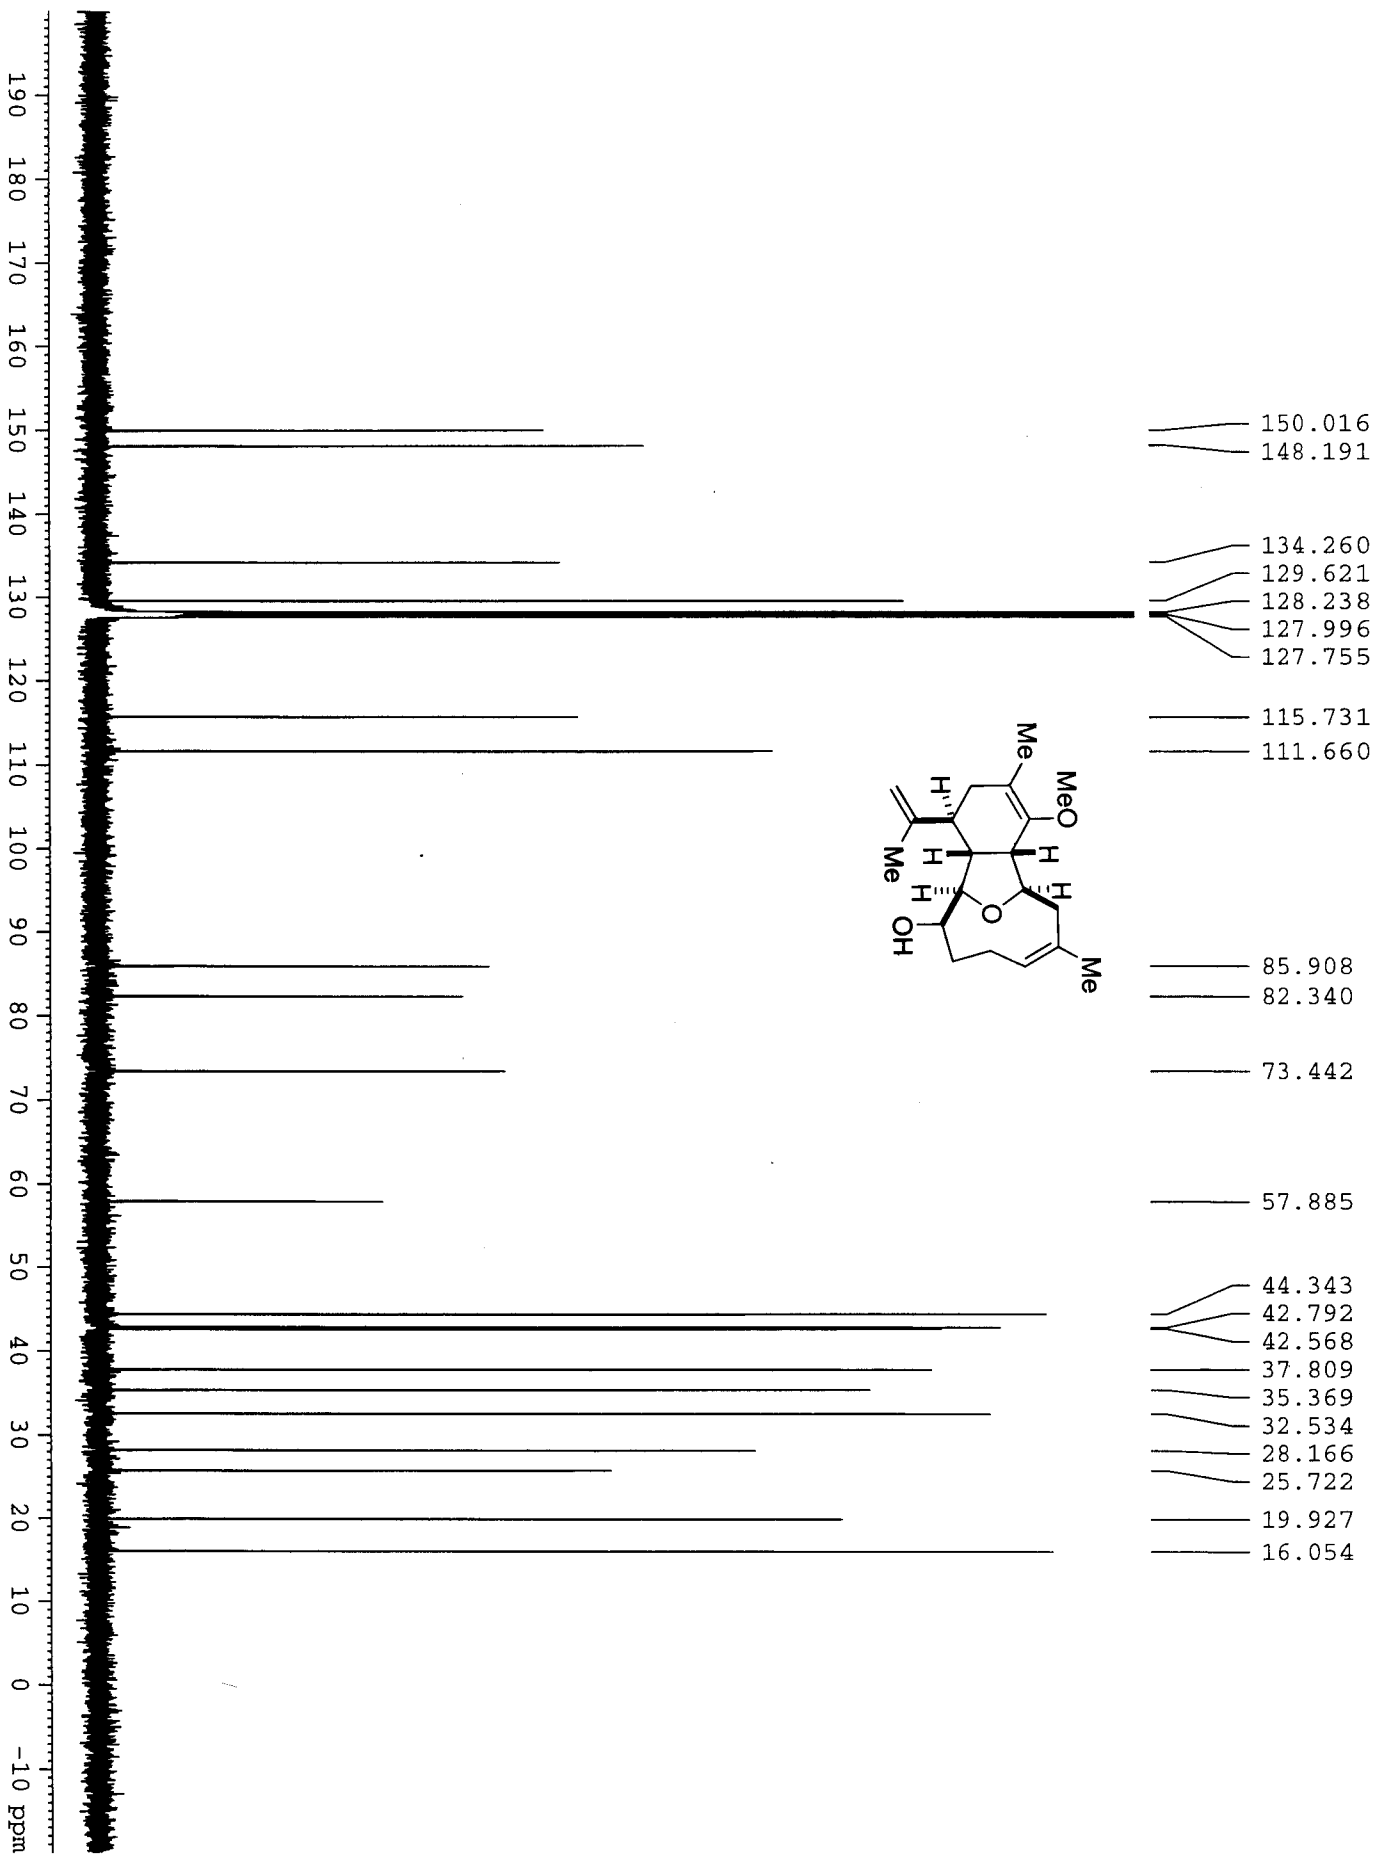

S31

400 MHz in CDCl<sub>3</sub>

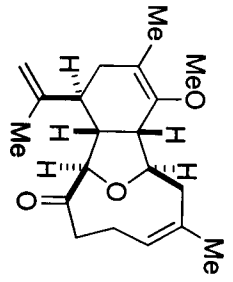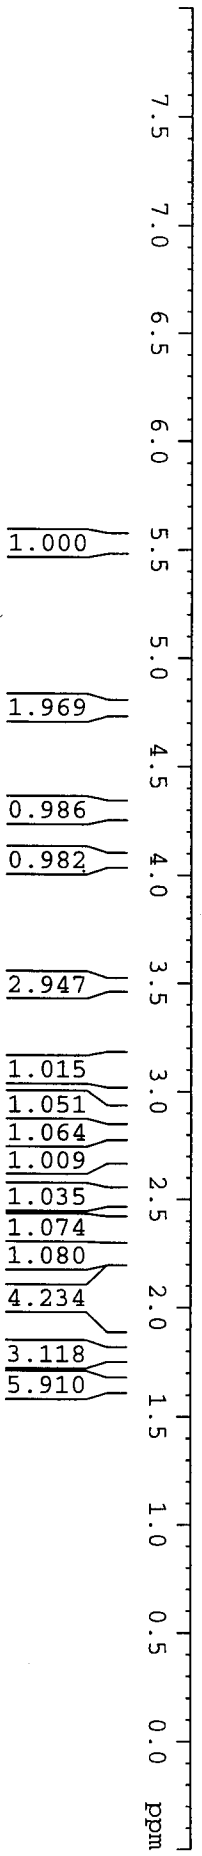

S32



100 MHz in CDCl<sub>3</sub>

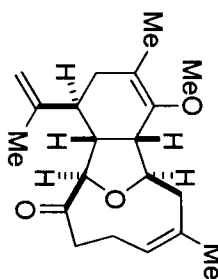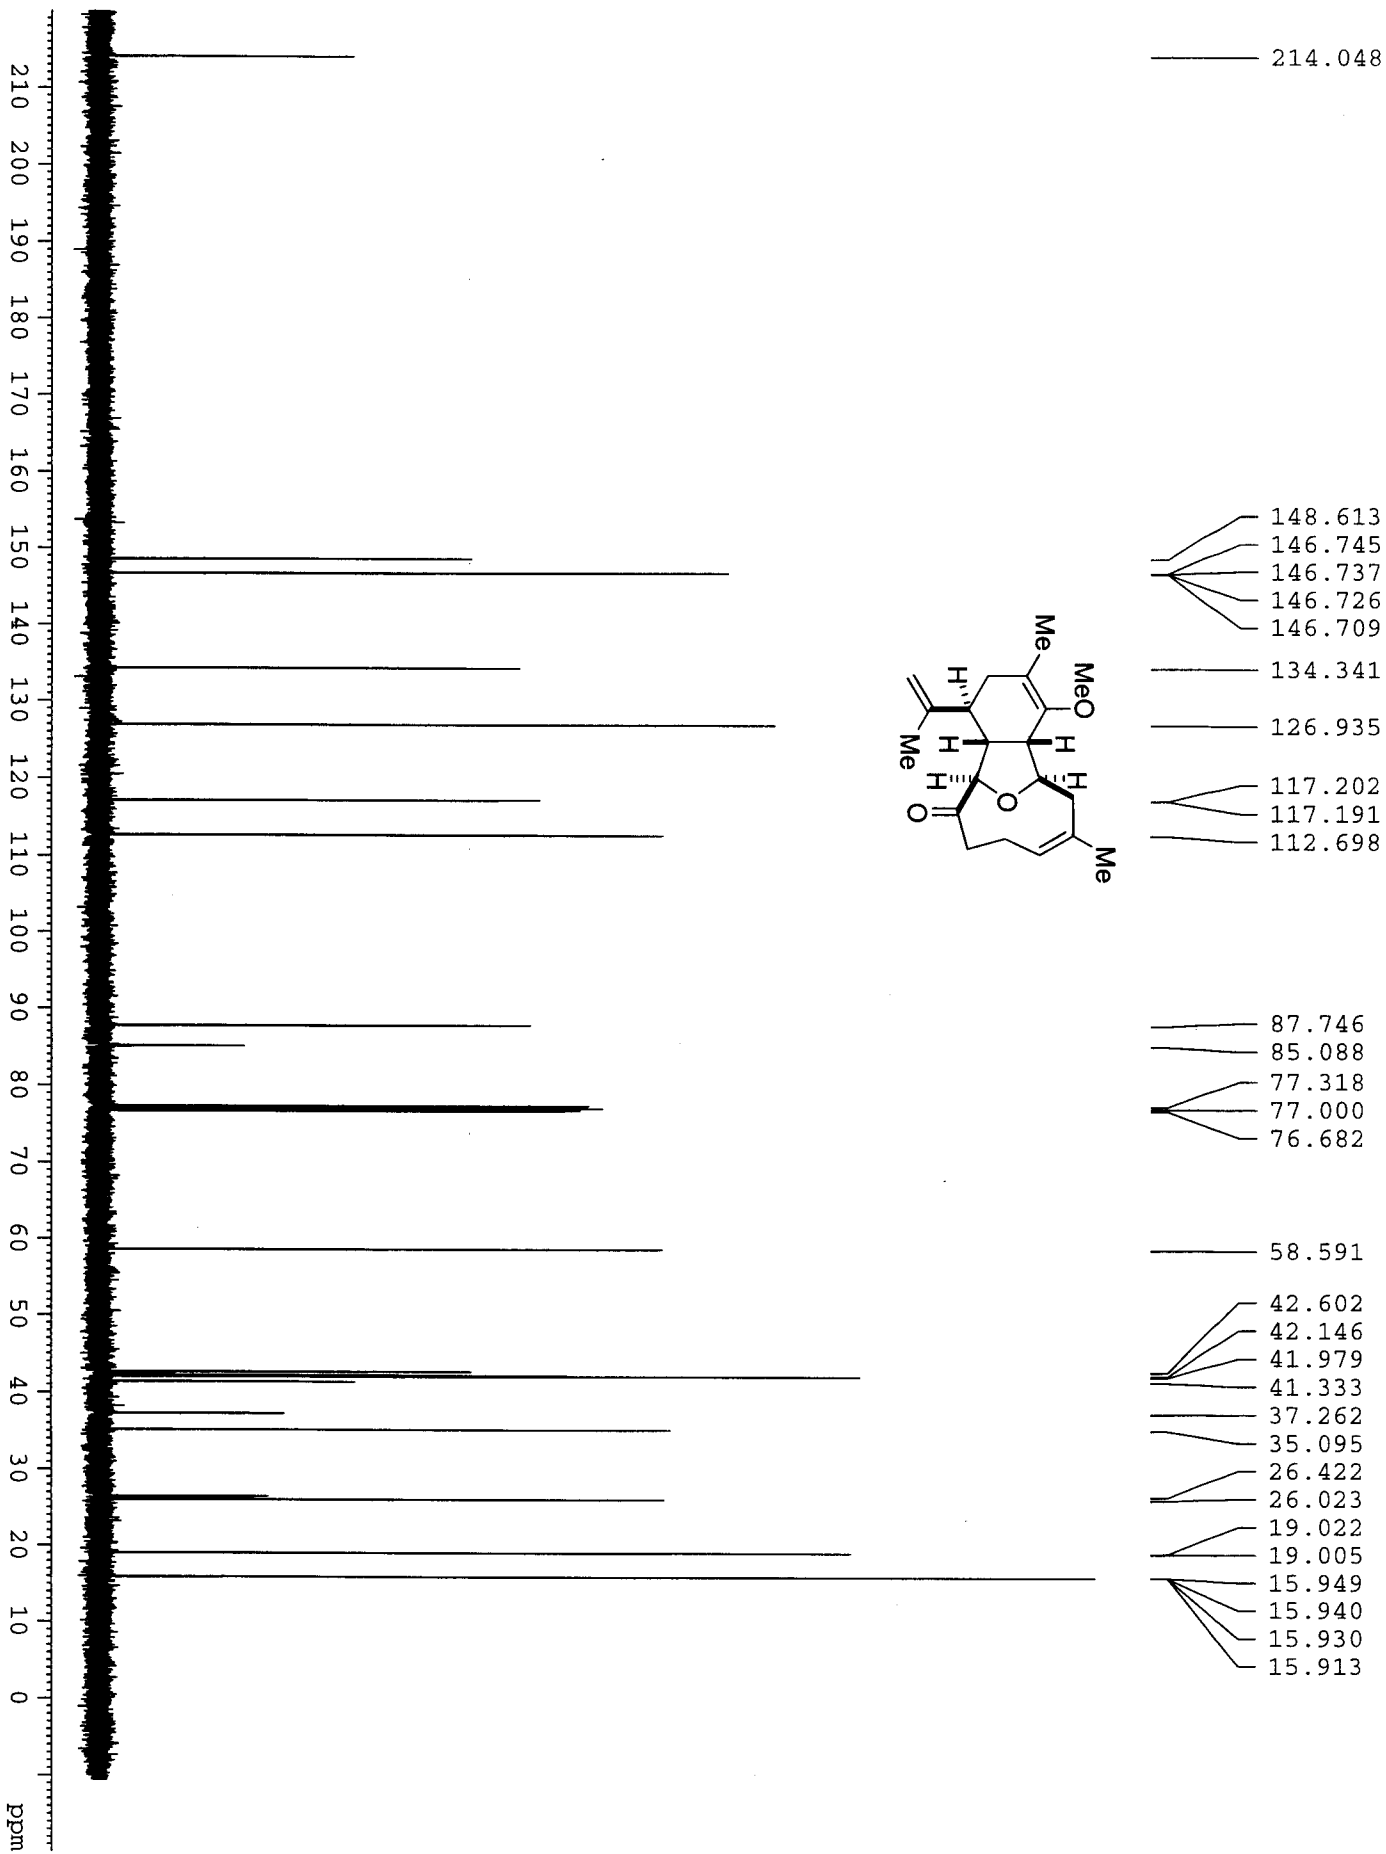

400 MHz in CDCl<sub>3</sub>

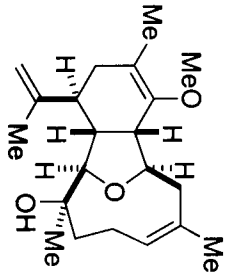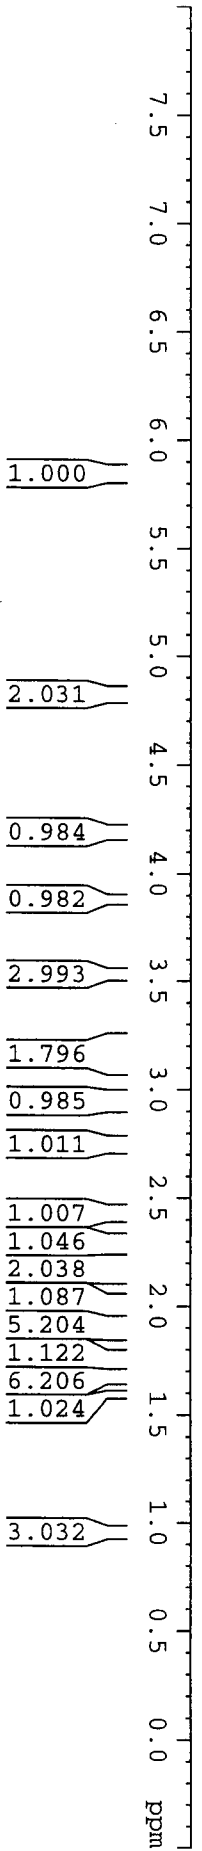

S34

100 MHz in CDCl<sub>3</sub>

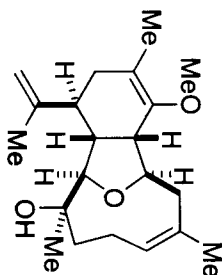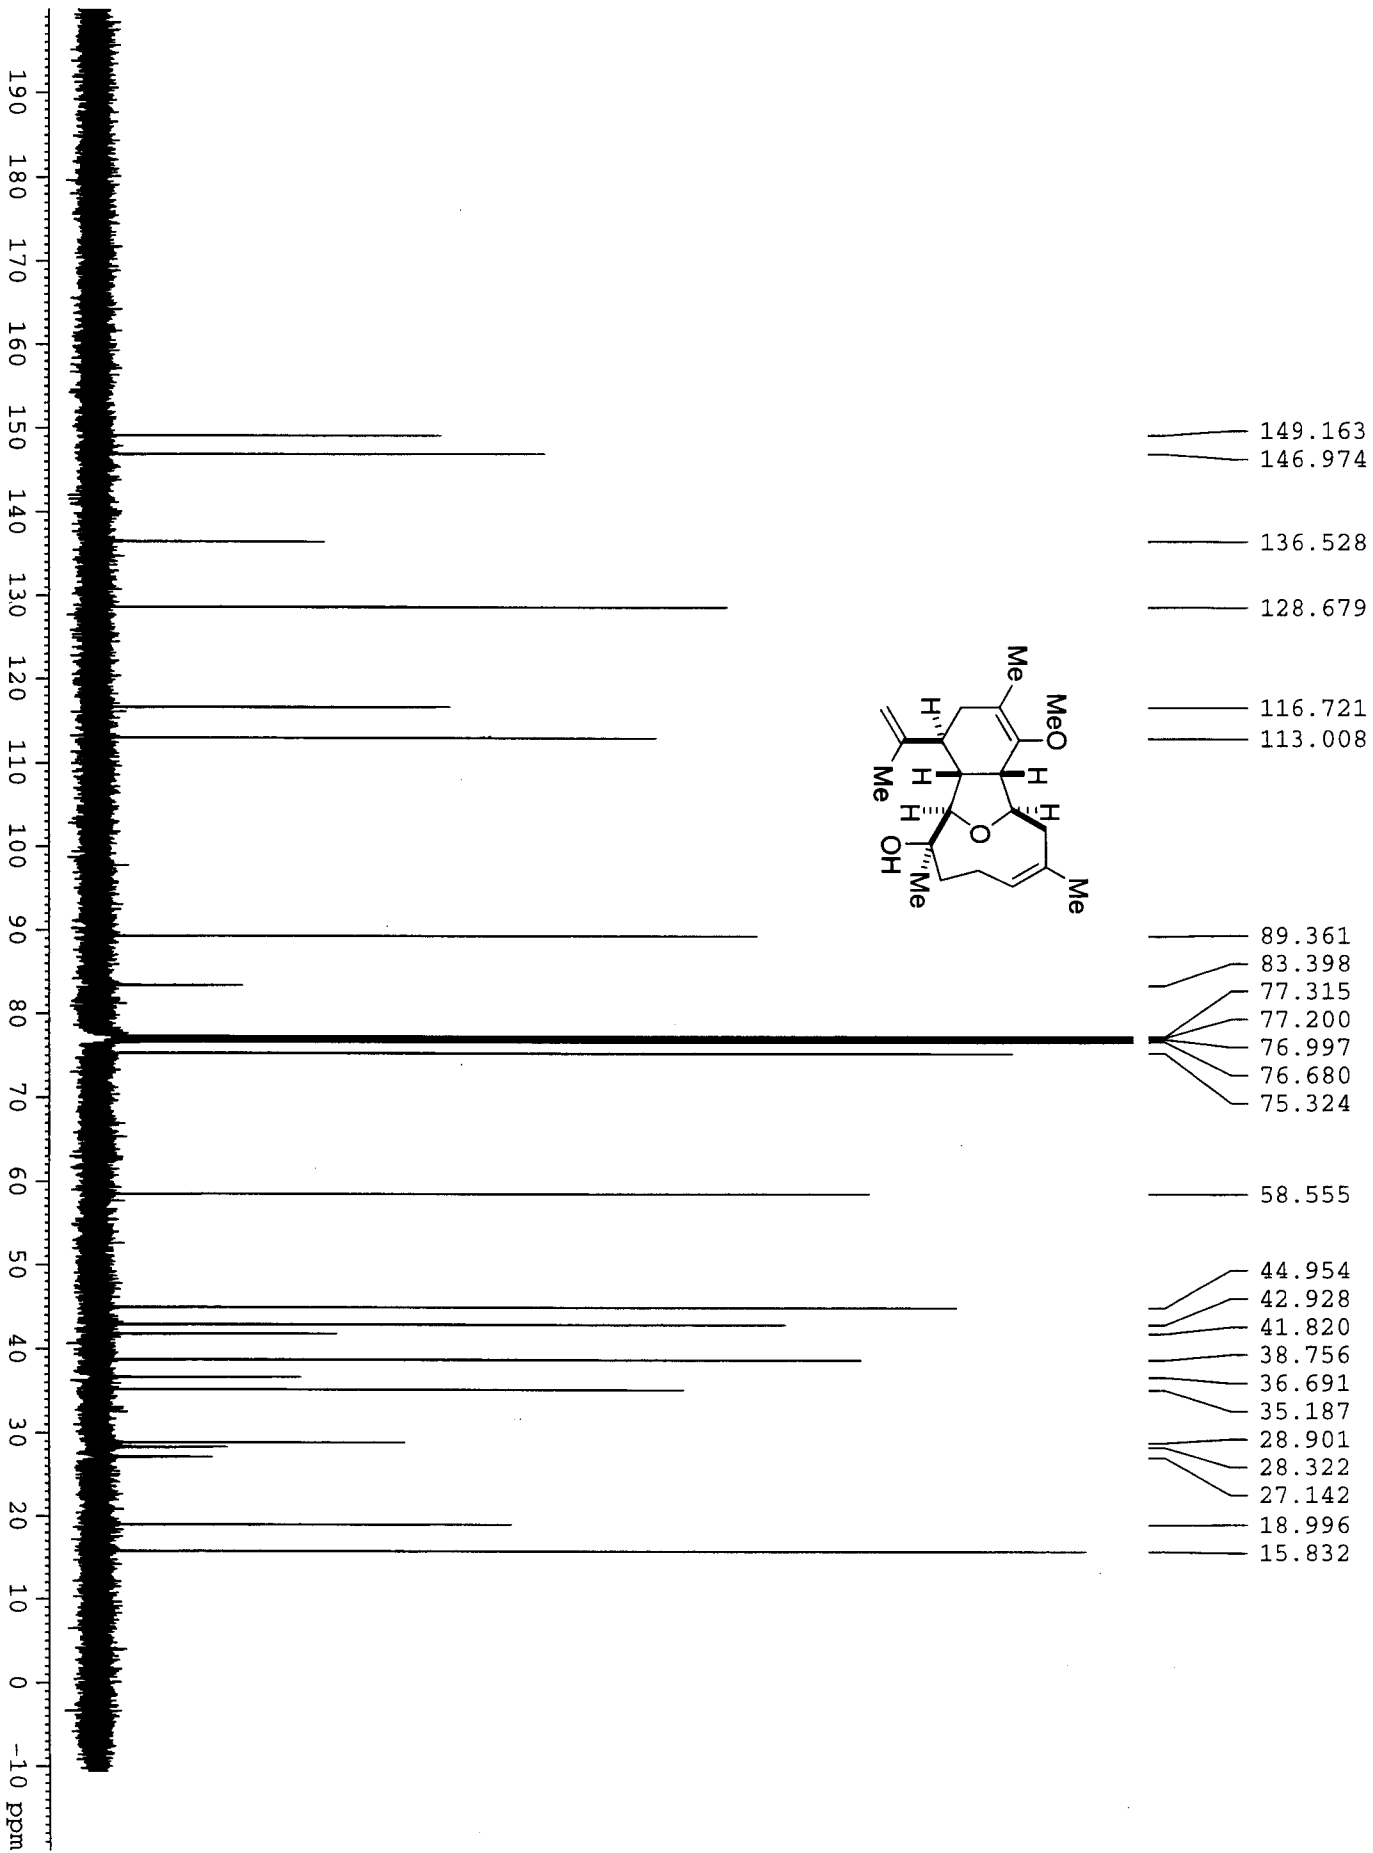

S35

400 MHz in CDCl<sub>3</sub>

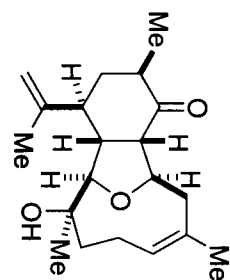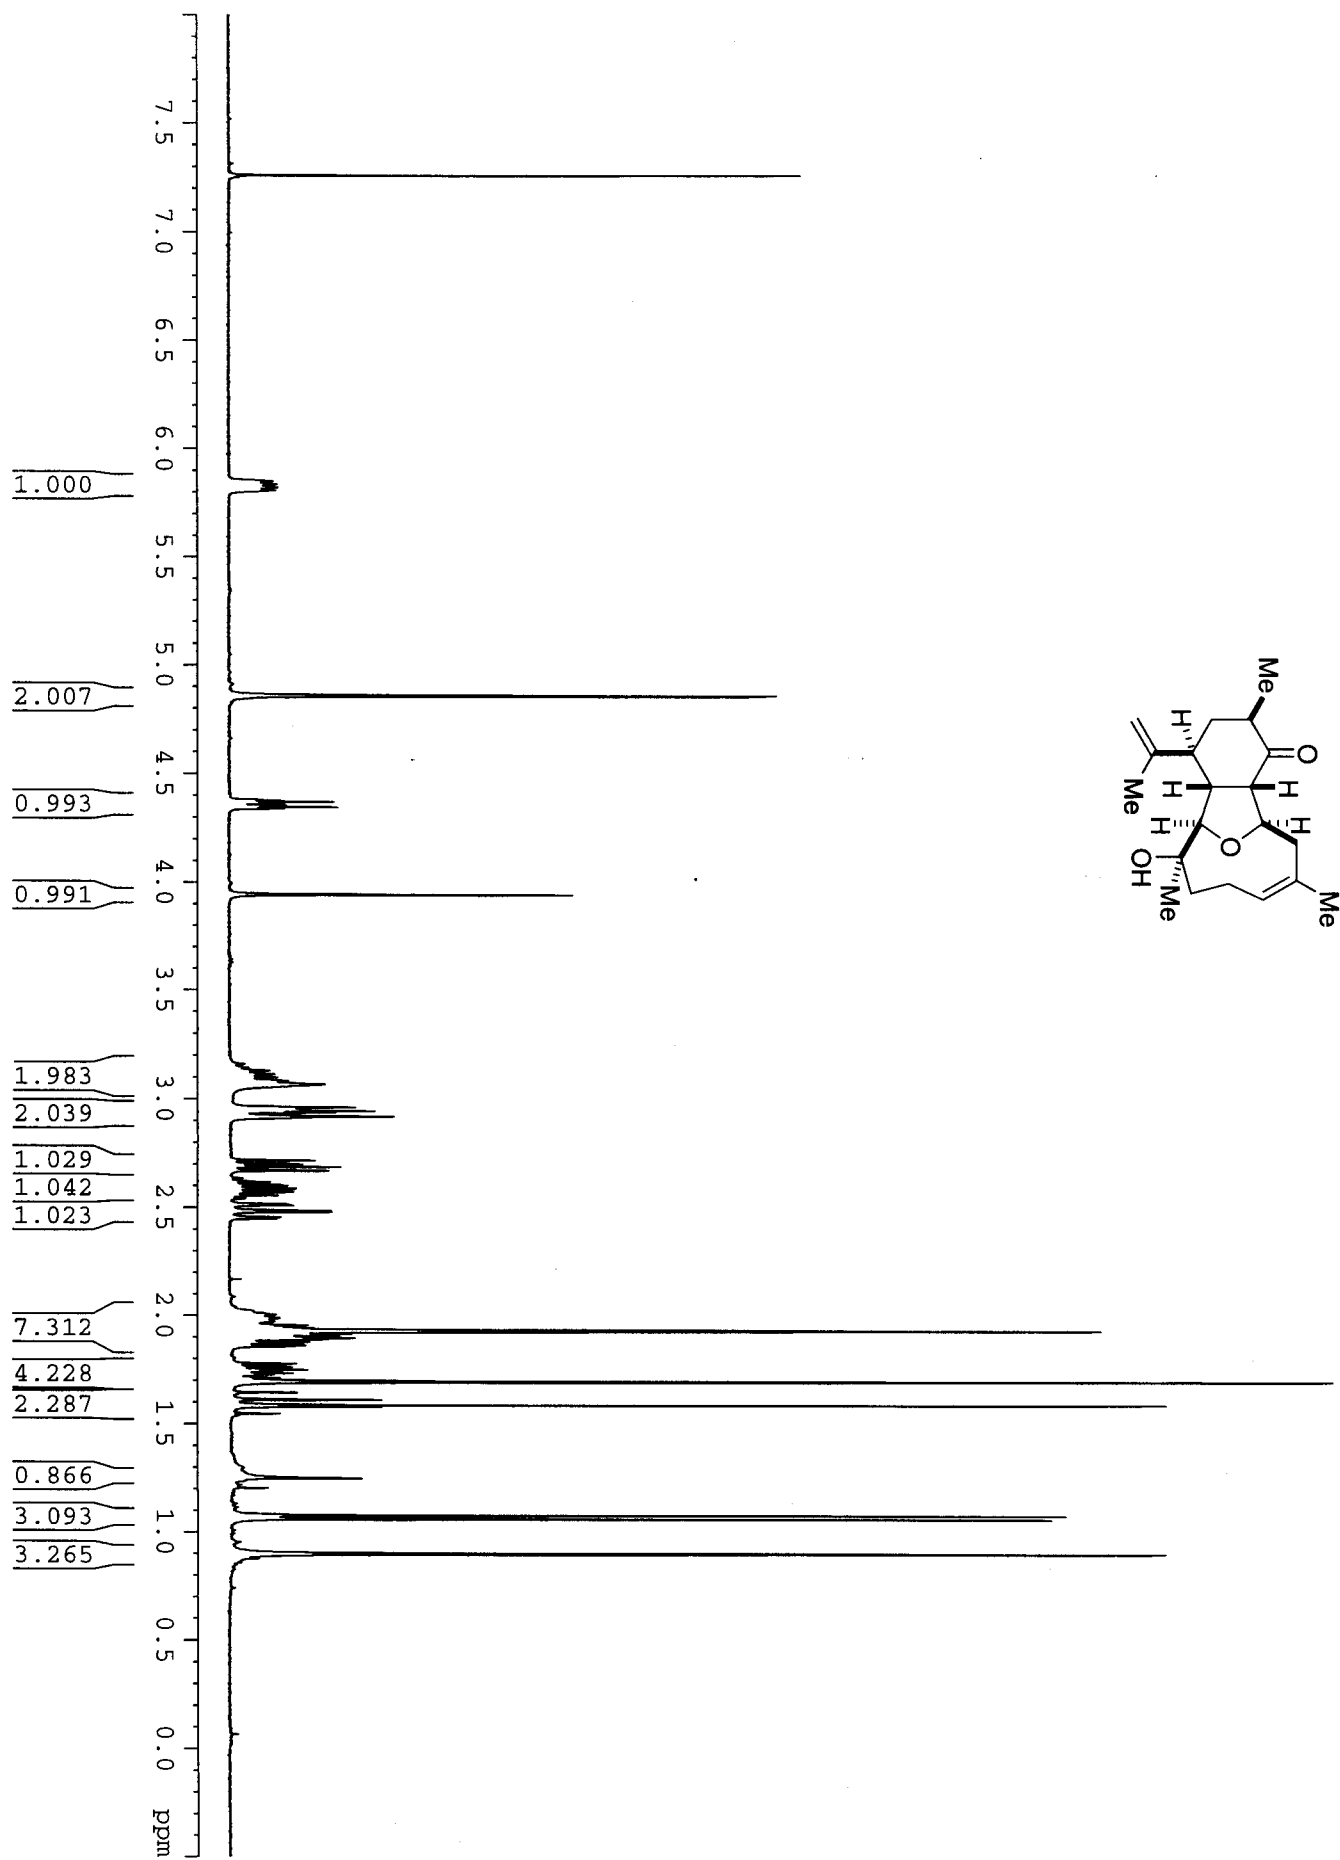

S36

100MHz in CDCl3

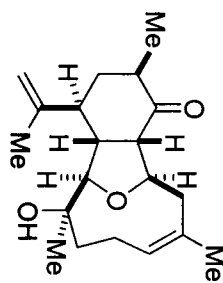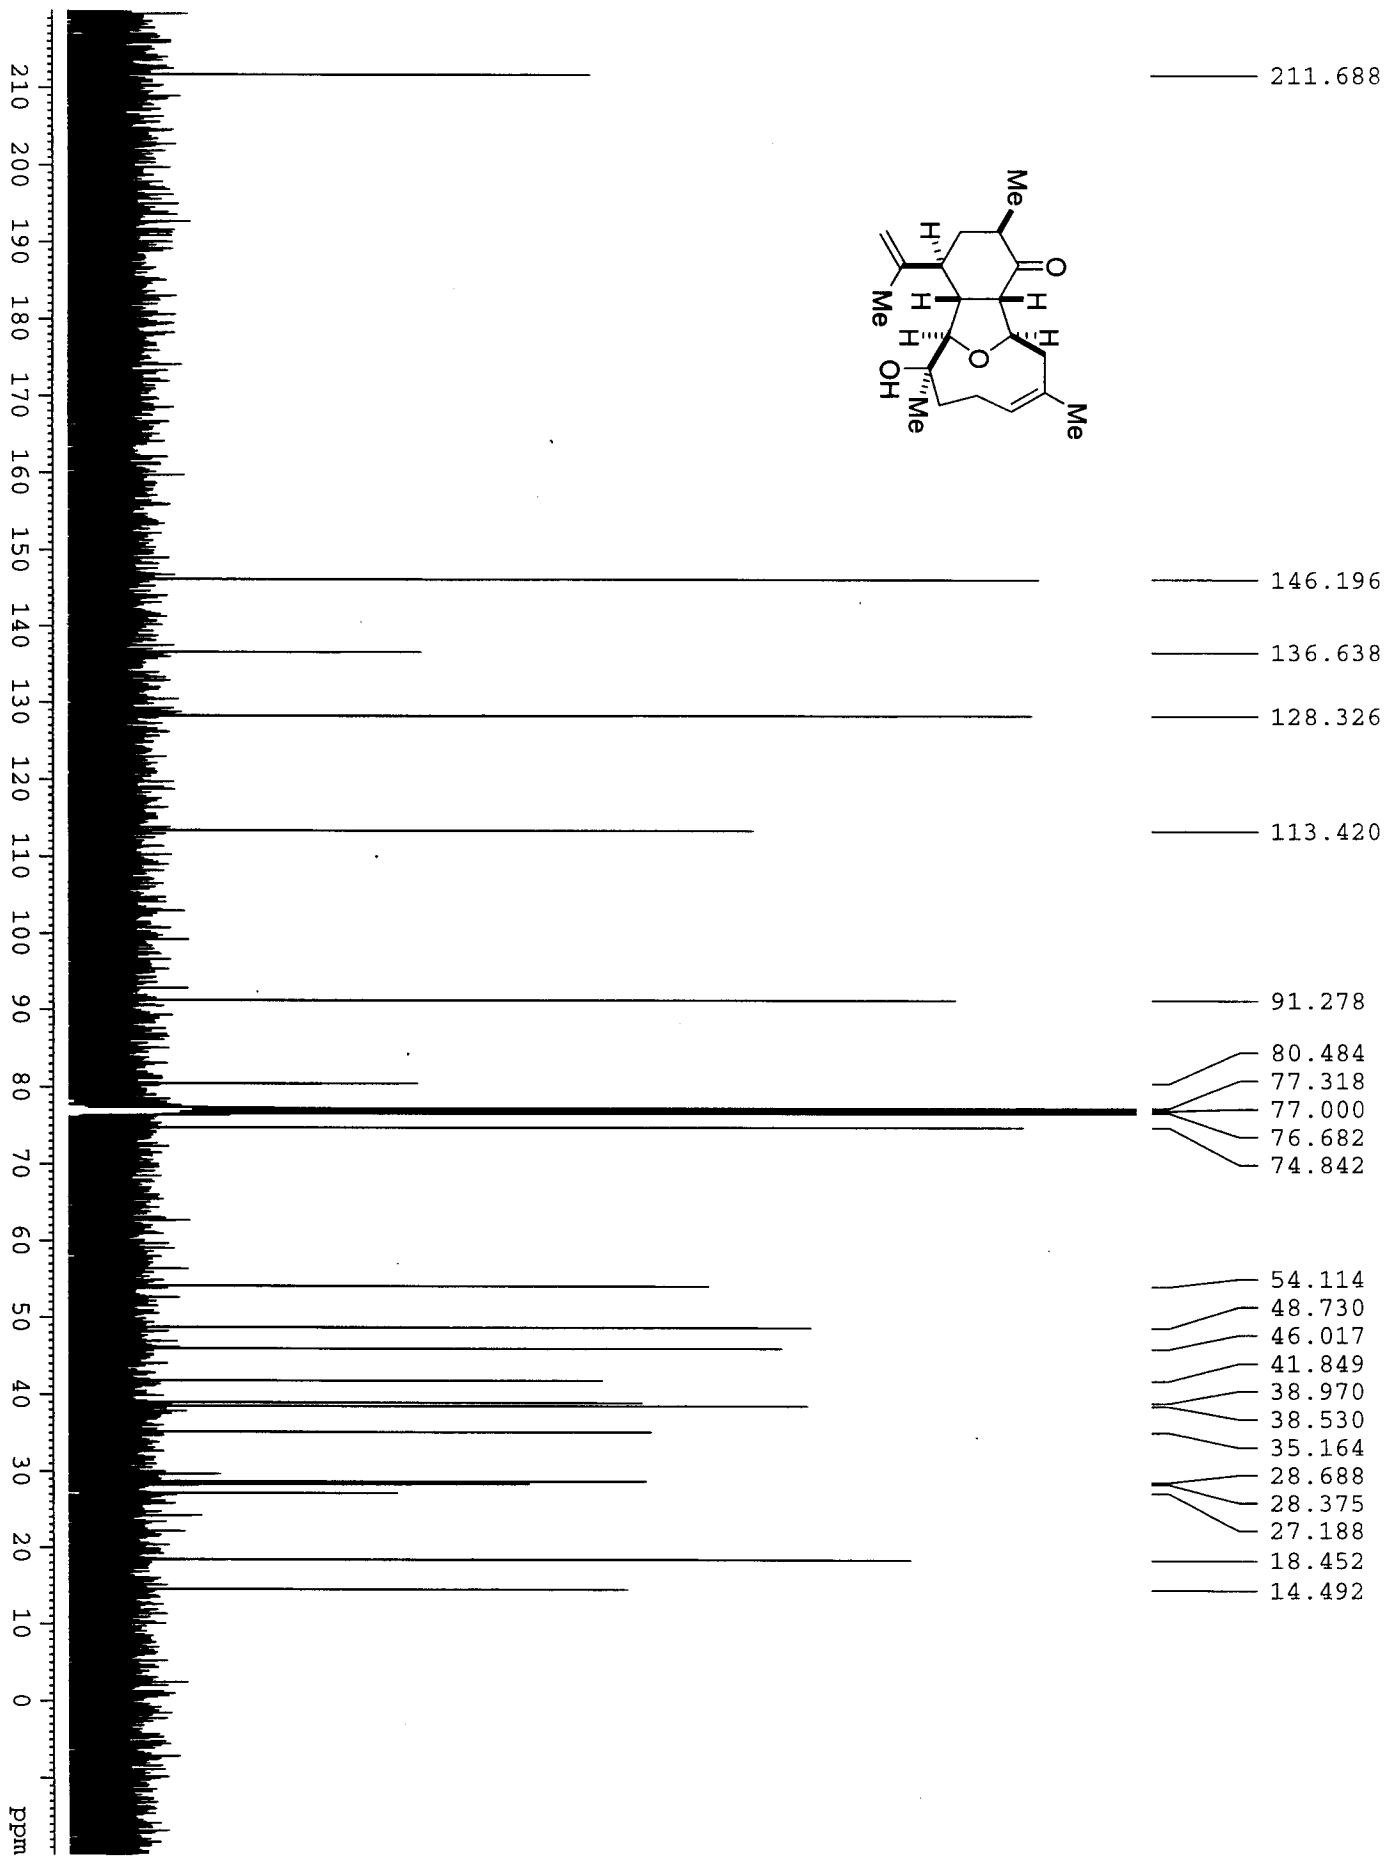

S37

400 MHz in CDCl<sub>3</sub>

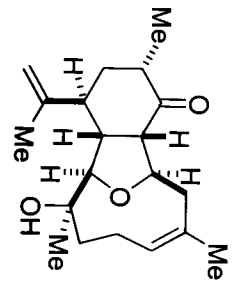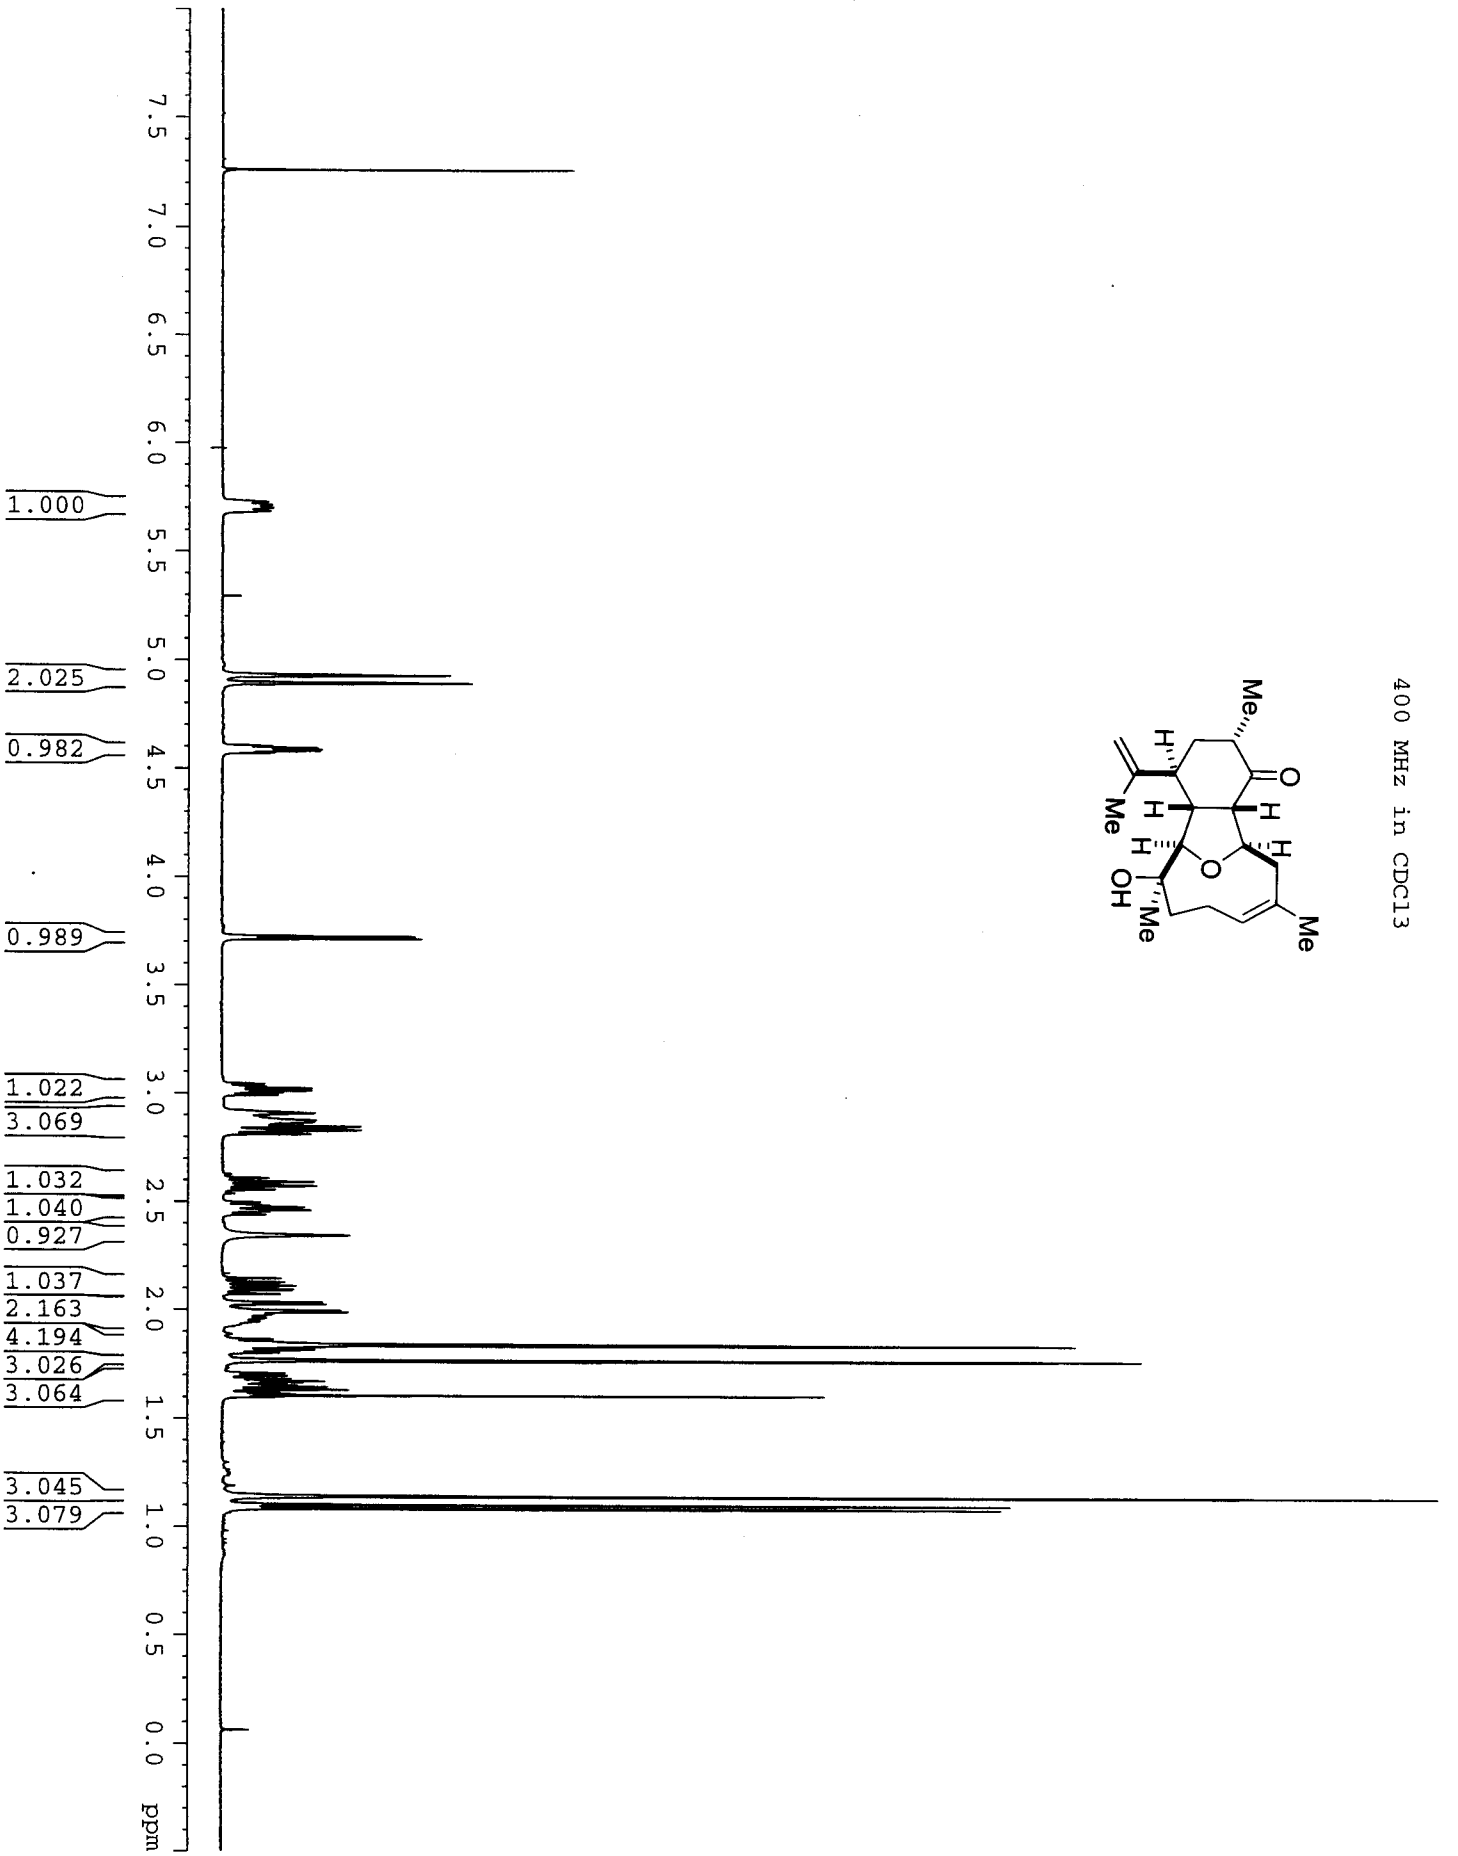

S38

100 MHz in CDCl<sub>3</sub>

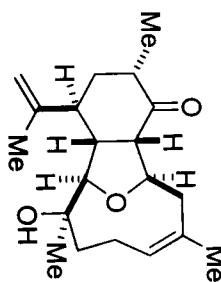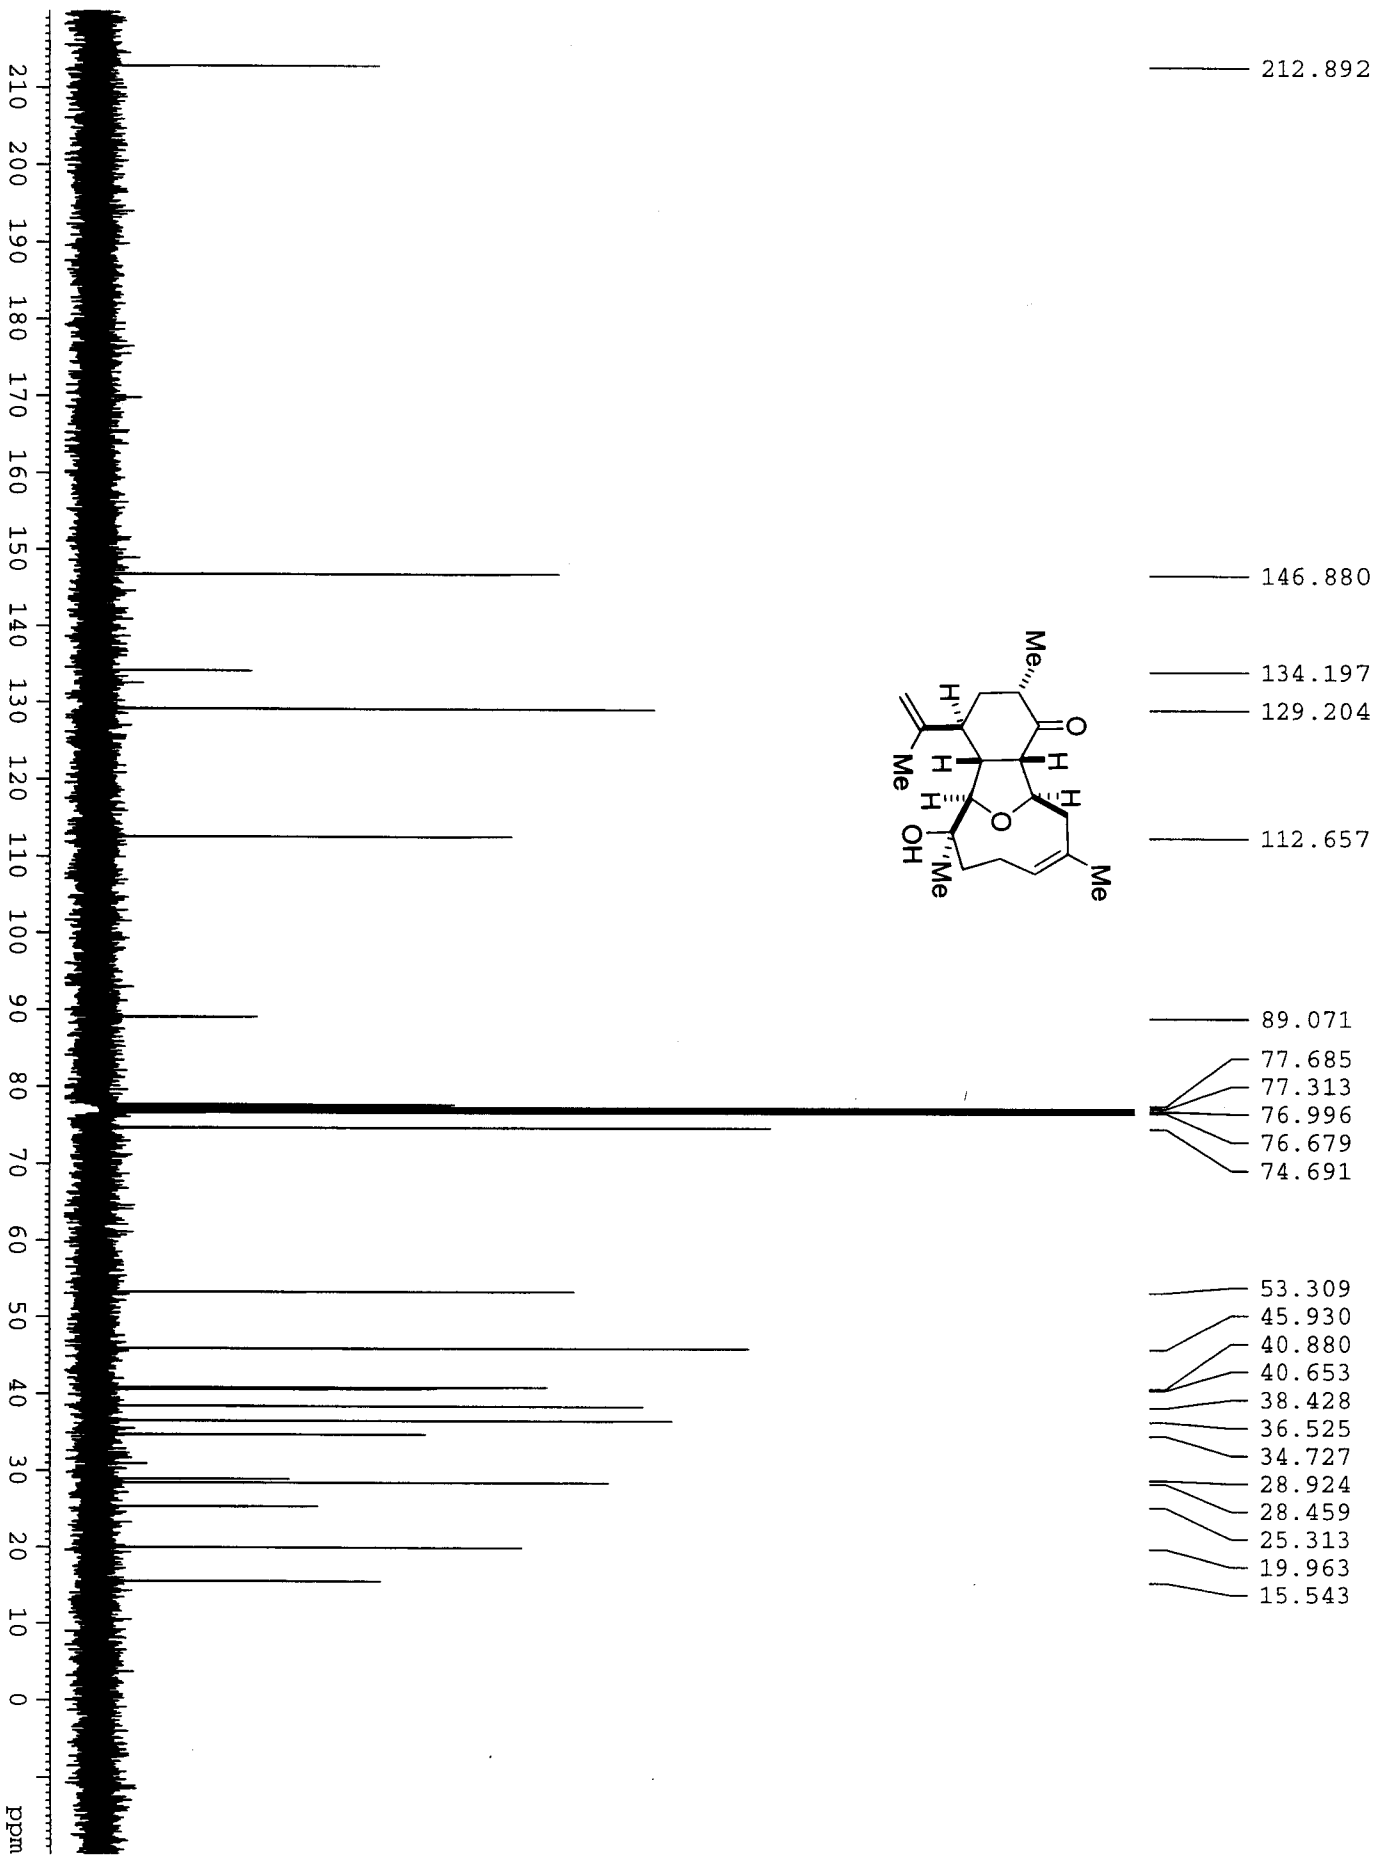

S39

400 MHz in C6D6 at 333K

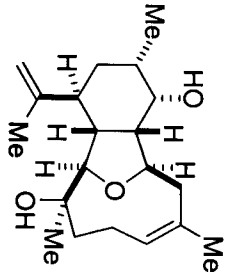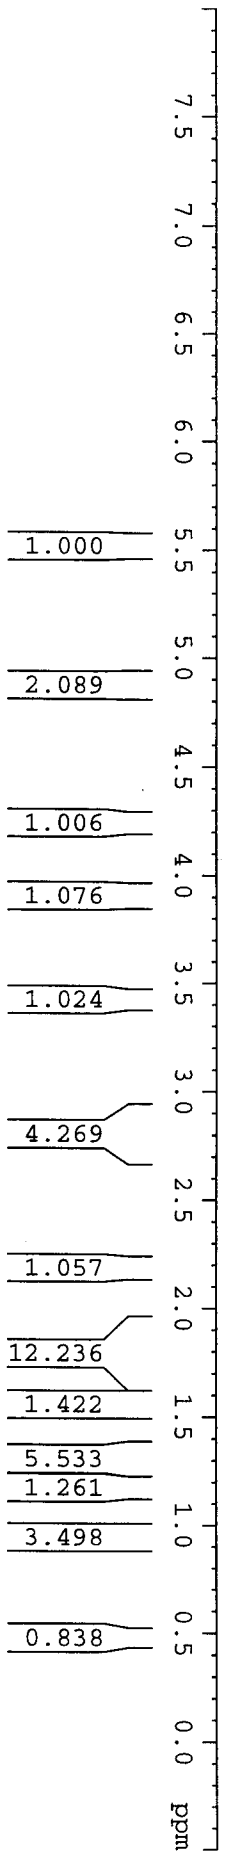

S40



100 MHz in C6D6 at 333K

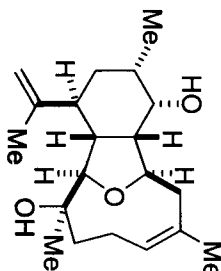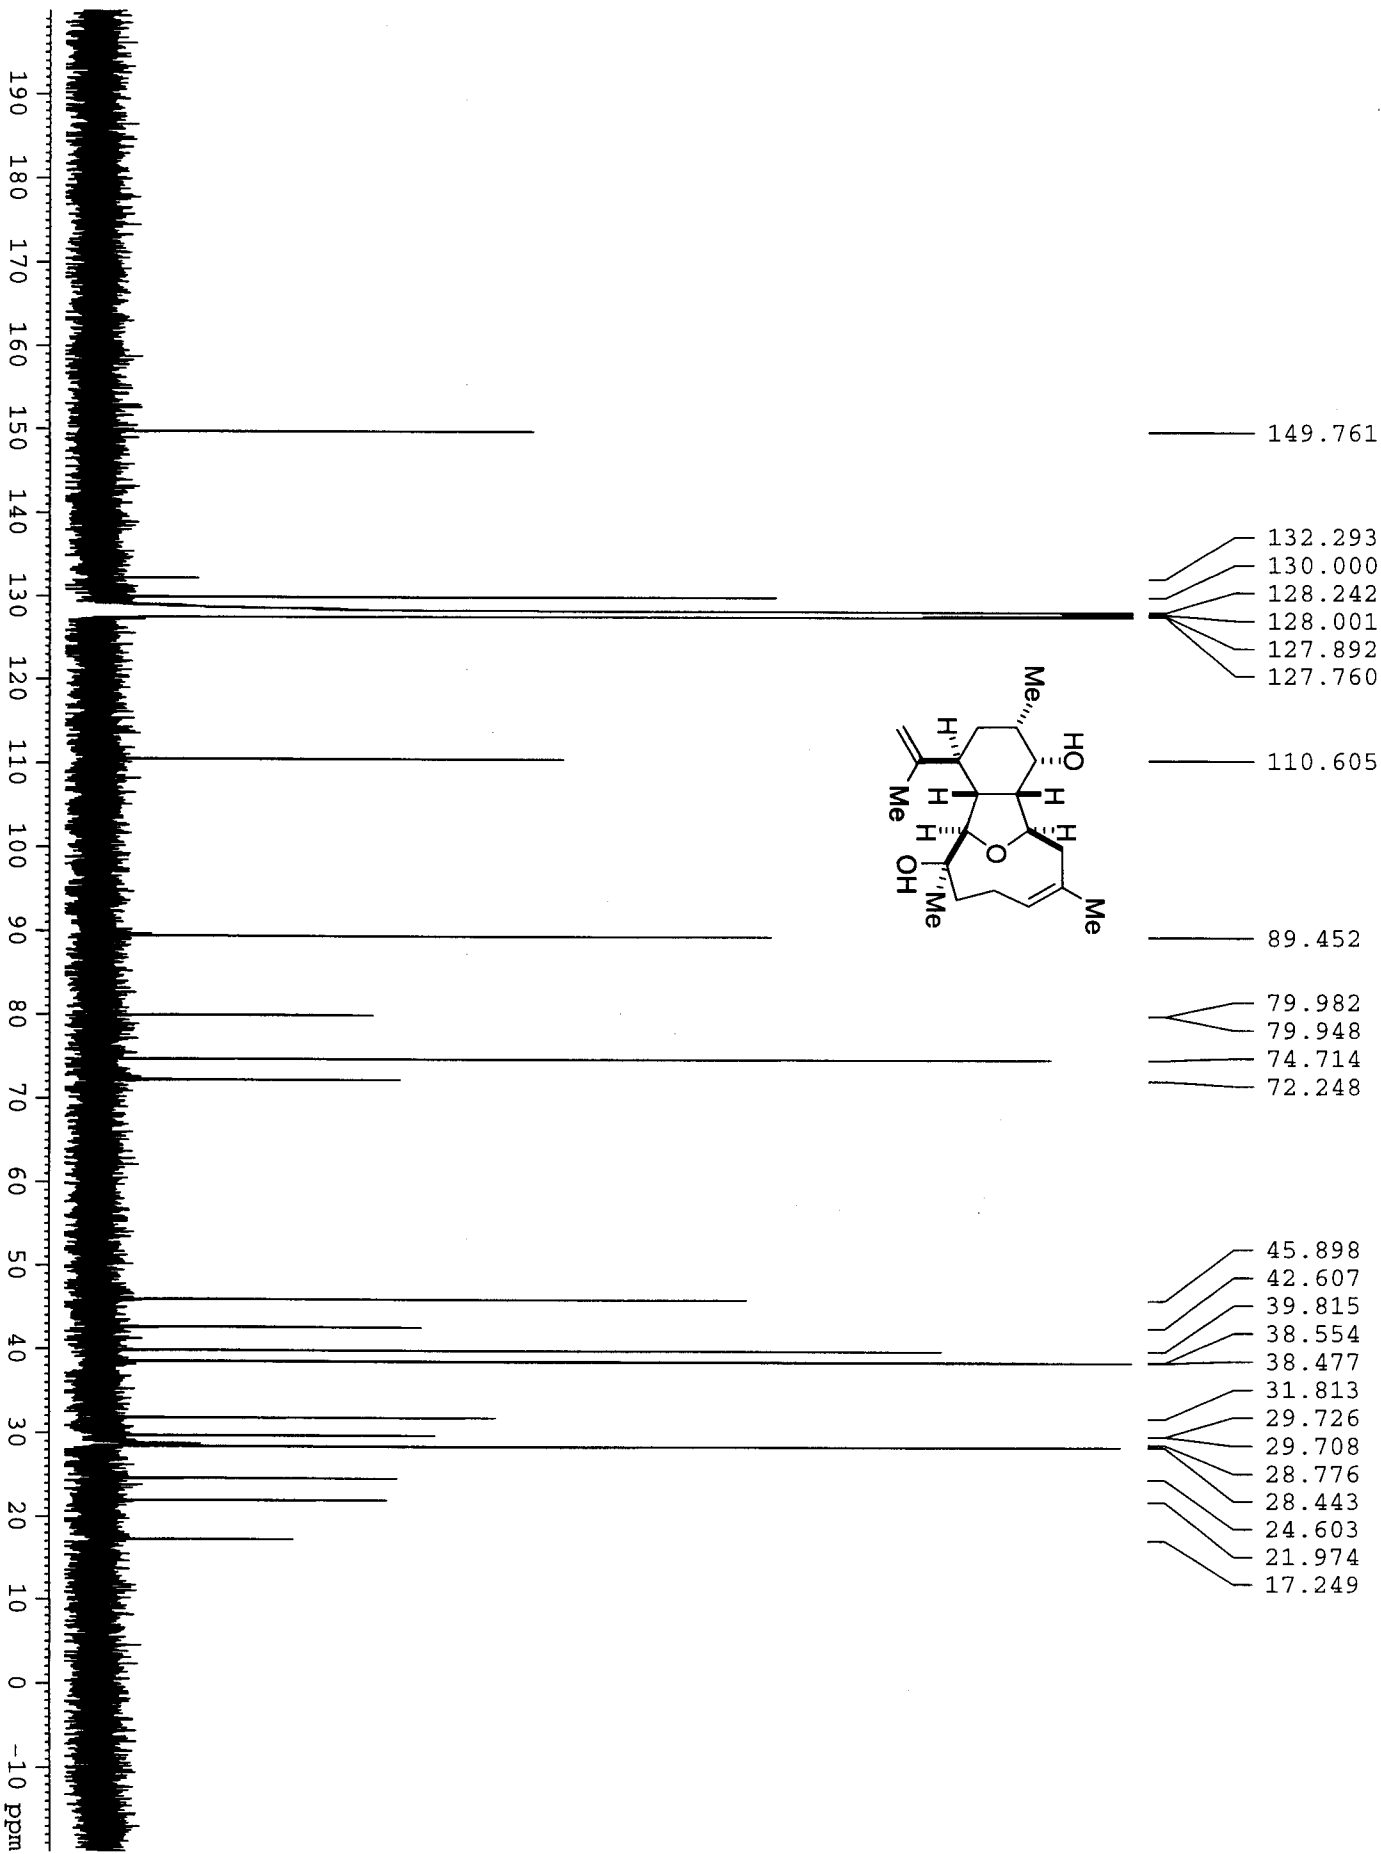

S41

400 MHz in C6D6 at 333K

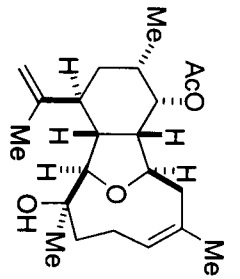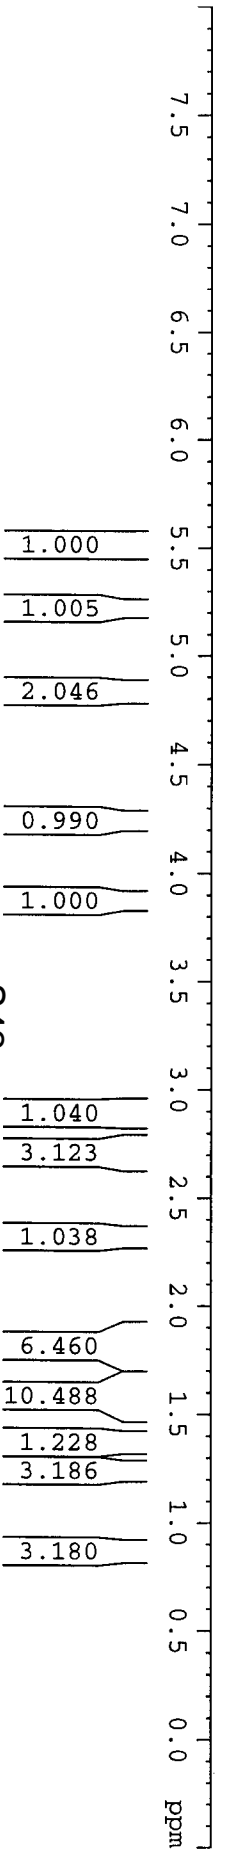

S42

100 MHz in C6D6 at 333K

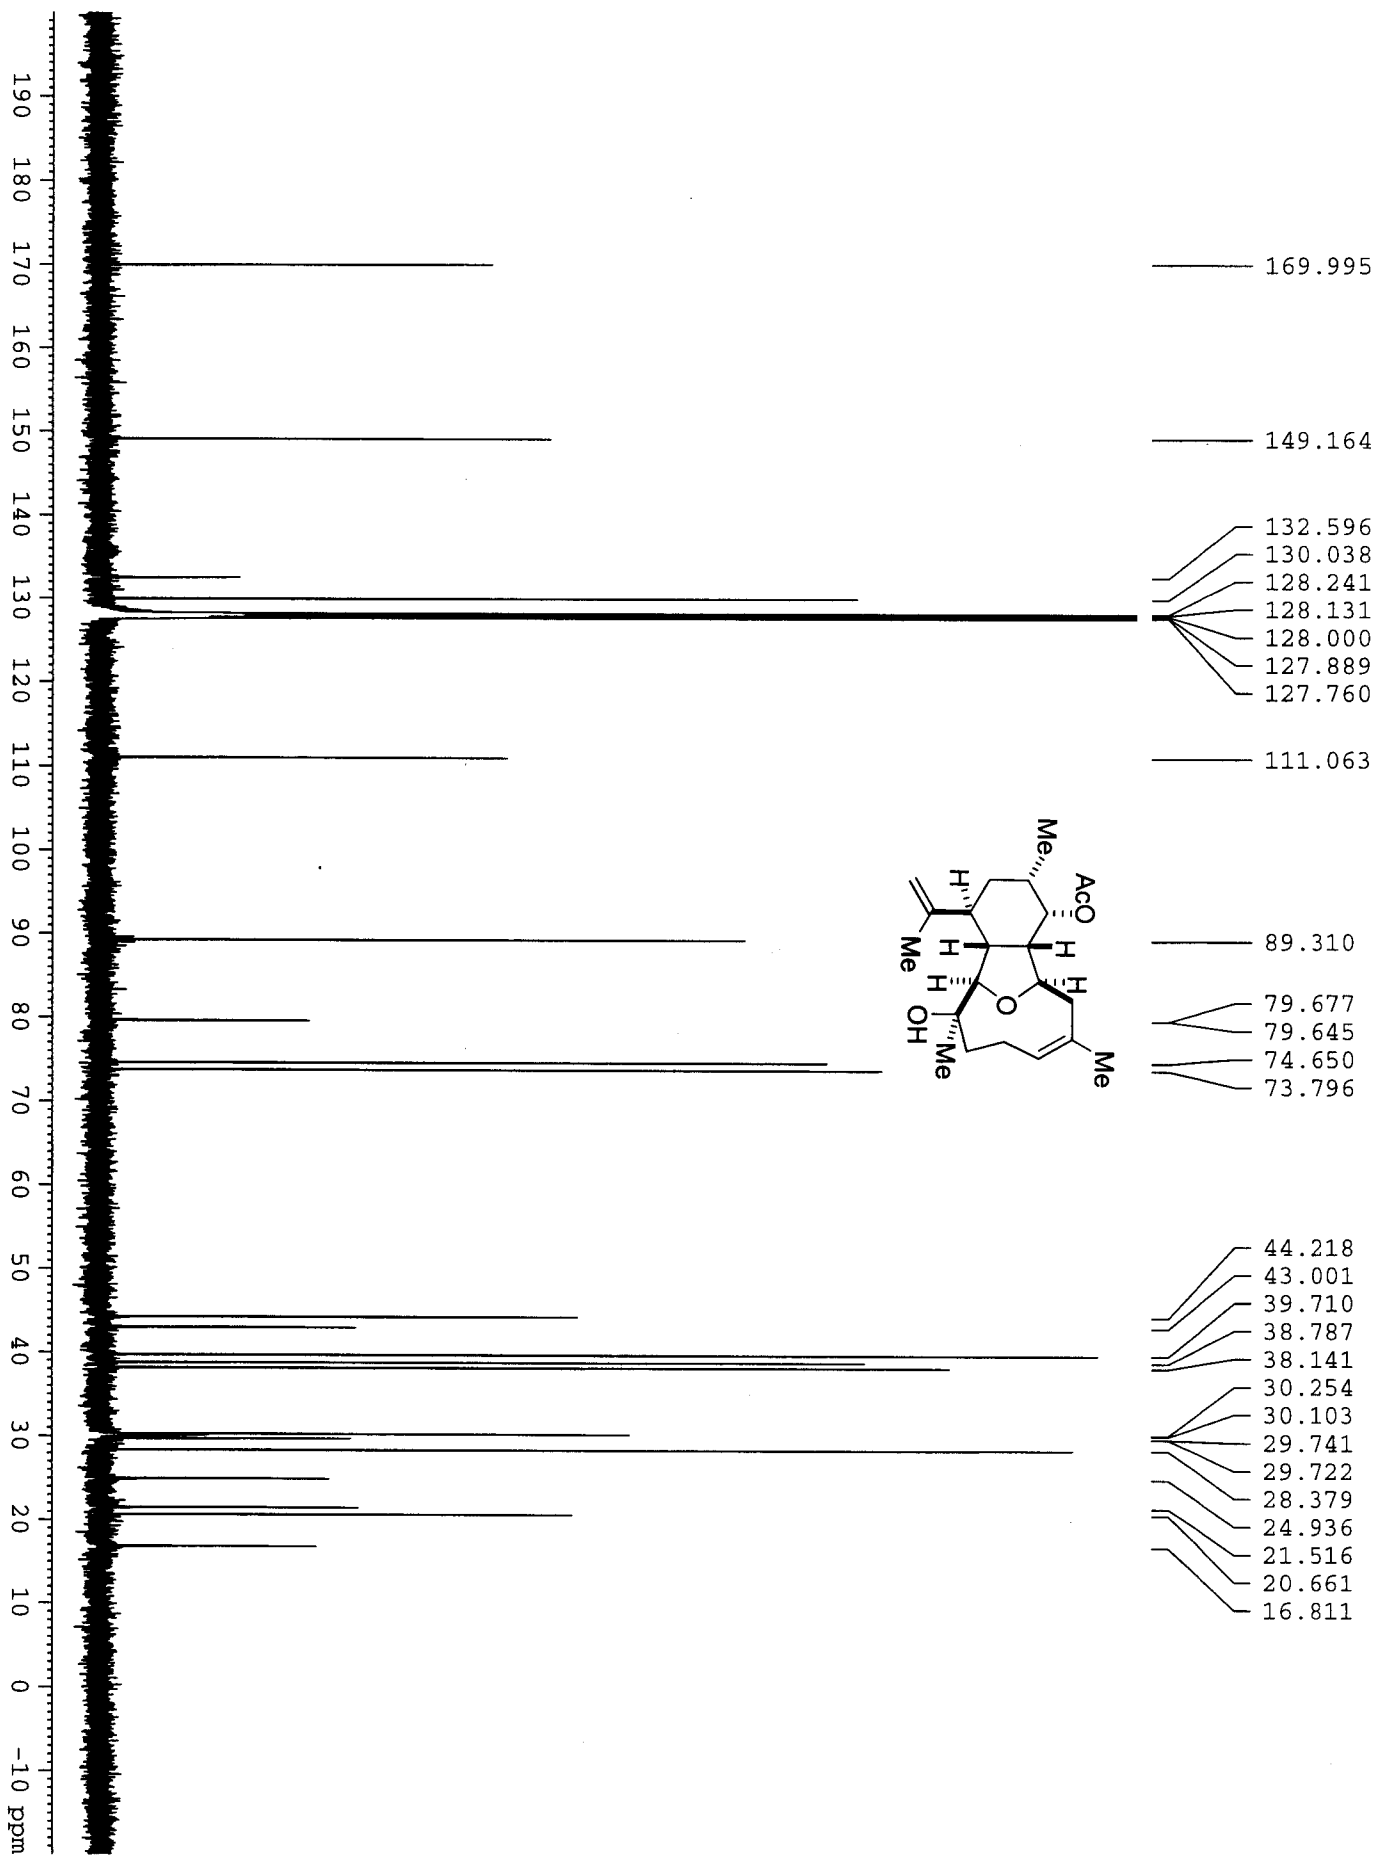

S43

400 MHz in C6D6 at 333K

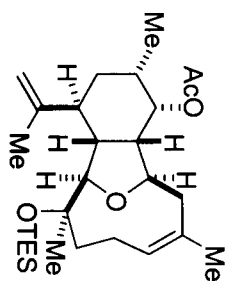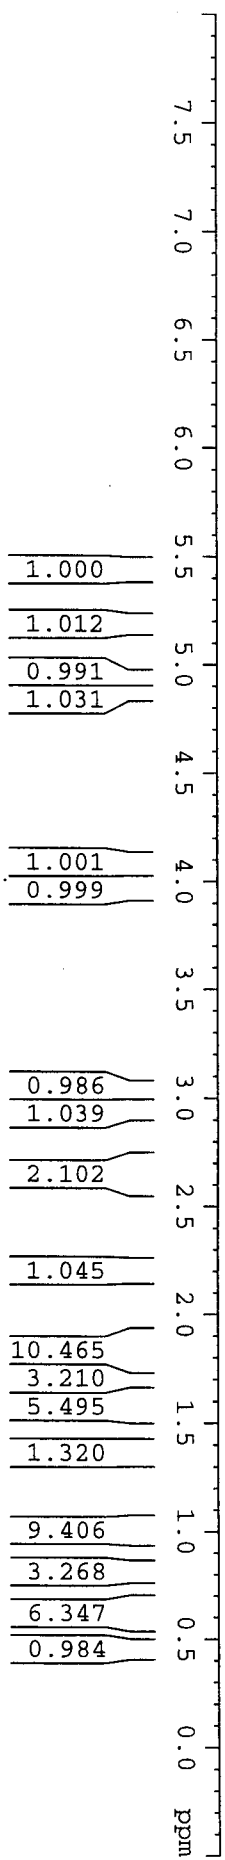

S44

100 MHz in C6D6 at 333K

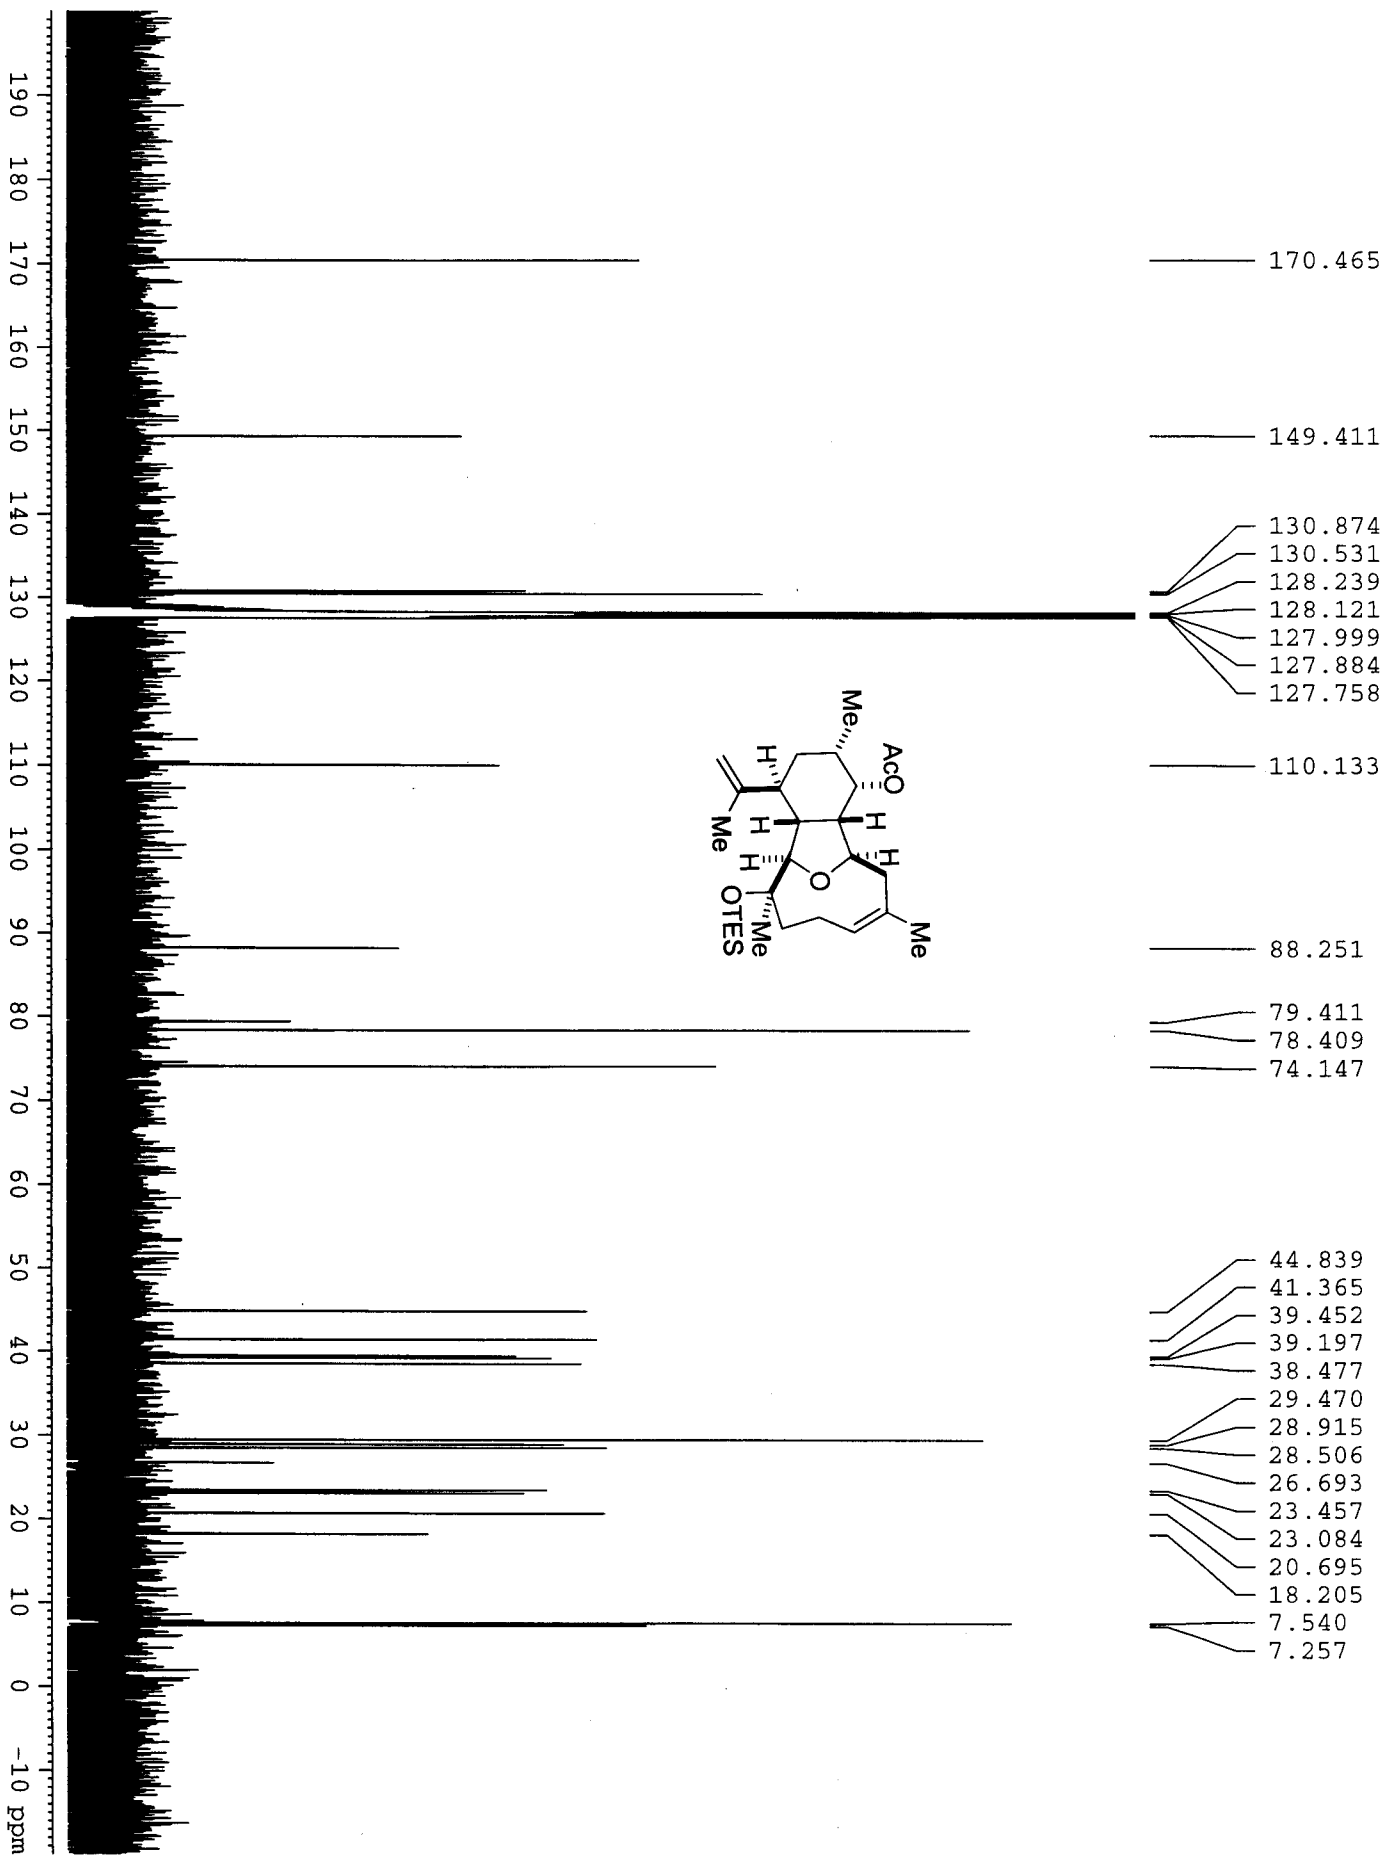

S45

400 MHz in CDCl3

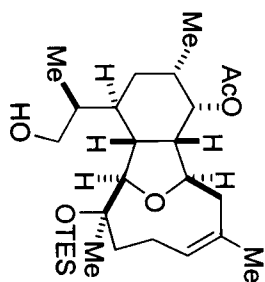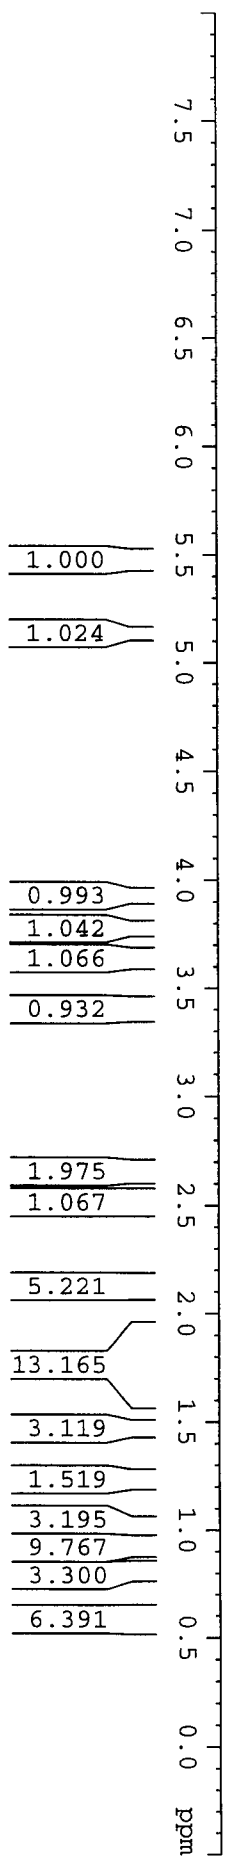

S46

100 MHz in CDCl3

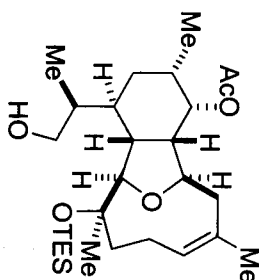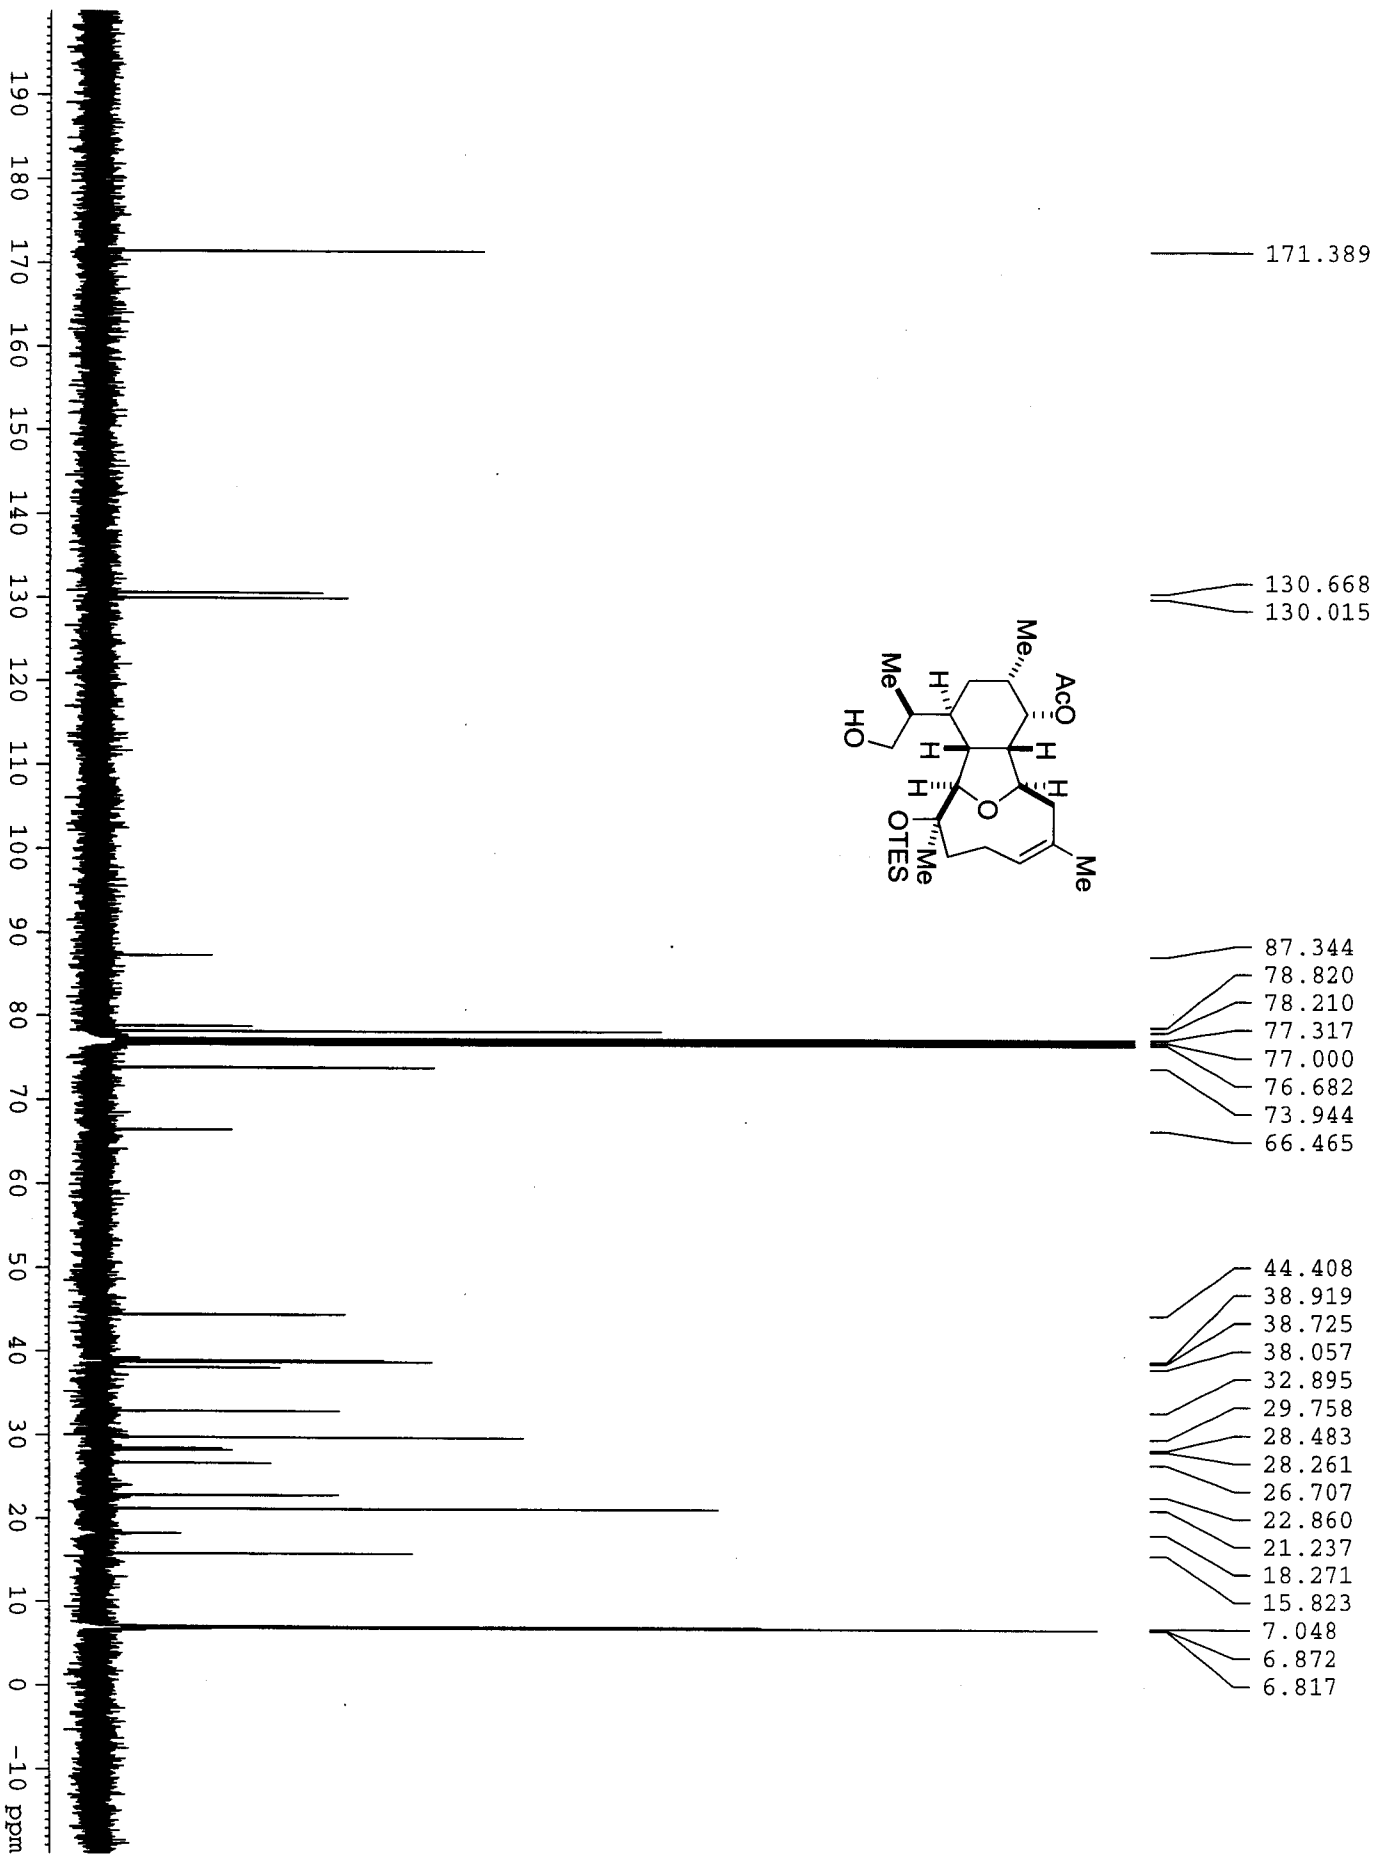

S47

500 MHz in CDCl<sub>3</sub>

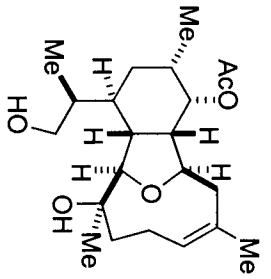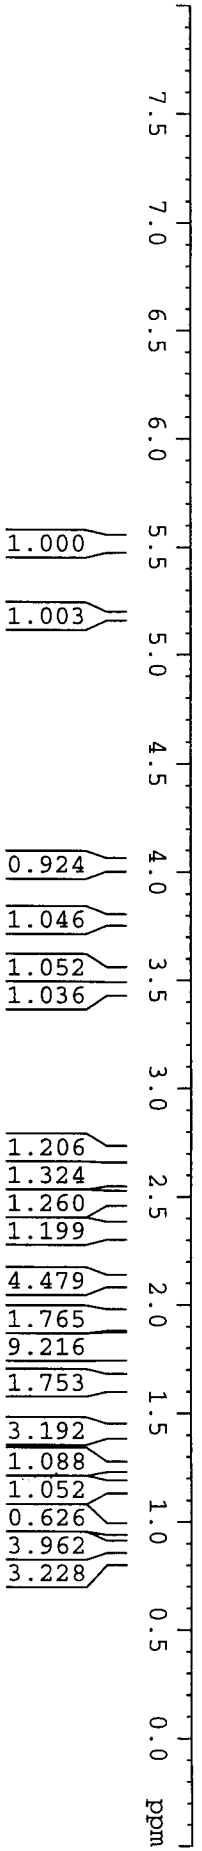

S48



125 MHz in CDCl<sub>3</sub>

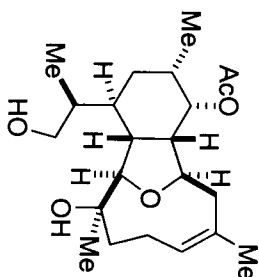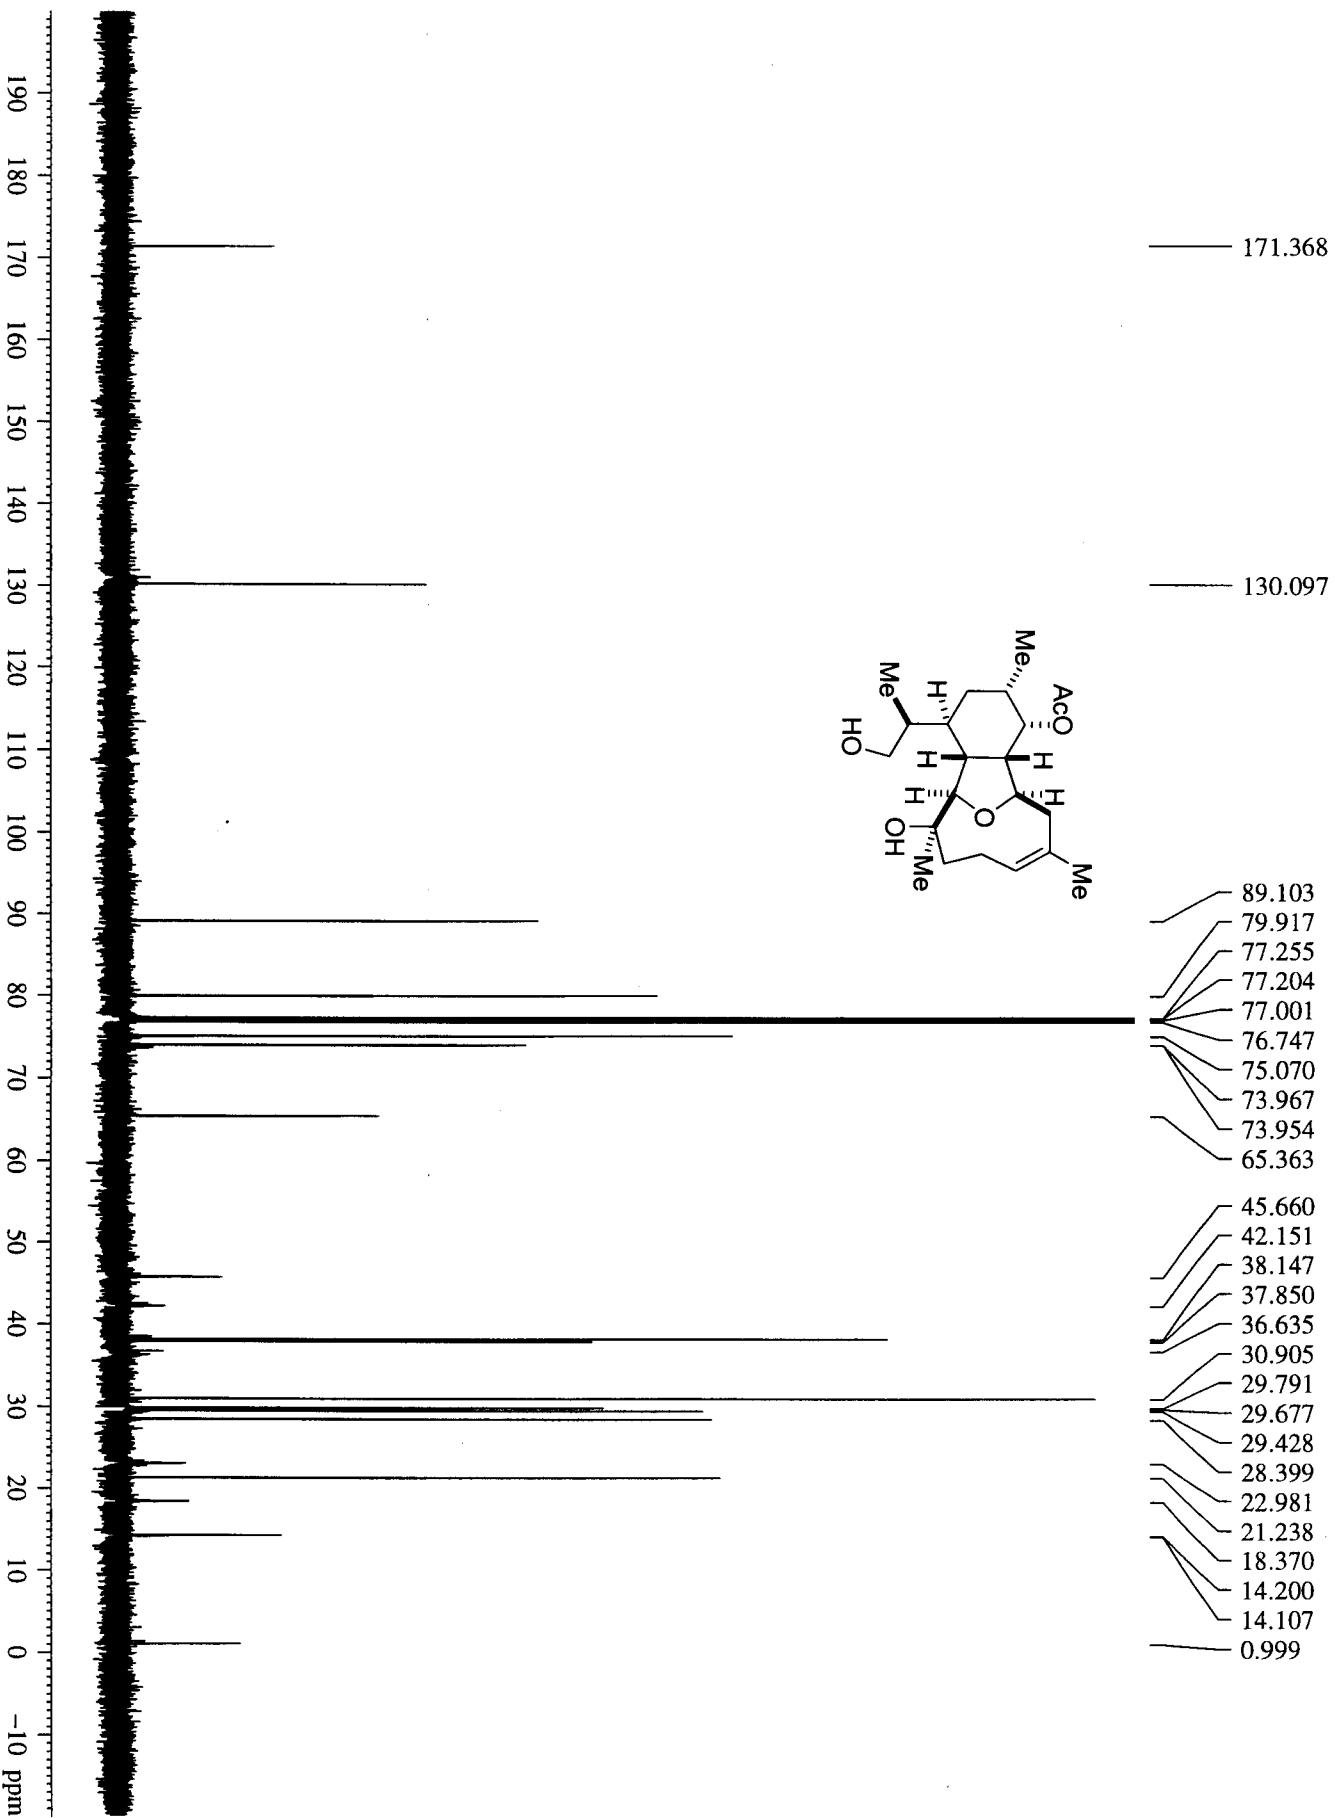

11-acetoxy-4-deoxyasbestinin D  
Synthetic sample, 500 MHz in CDCl<sub>3</sub>

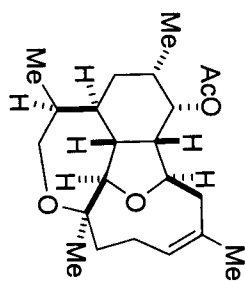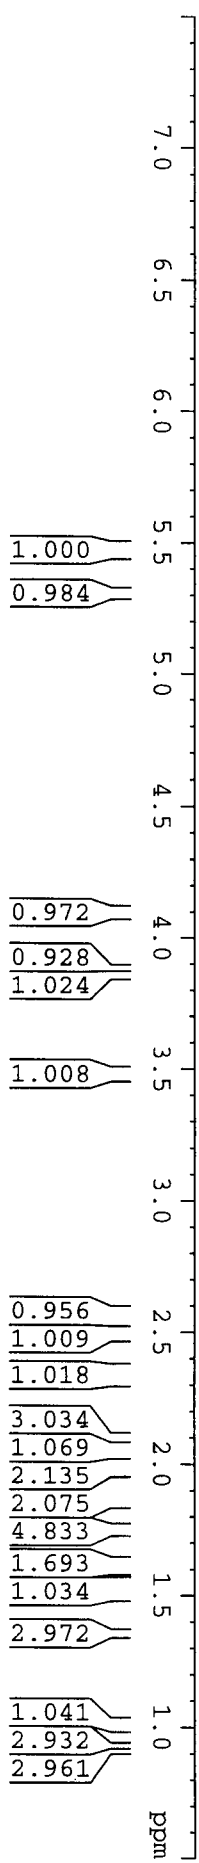

S50

11-acetoxy-4-deoxyasbestinin D  
125 MHz in CDCl<sub>3</sub>

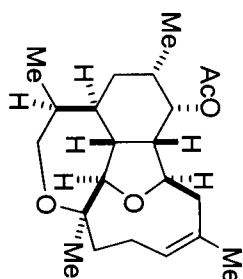

- 171.317
- 130.770
- 128.698
- 92.215
- 81.001
- 77.254
- 77.201
- 76.999
- 76.746
- 76.399
- 73.519
- 67.926
- 45.757
- 40.549
- 38.530
- 37.985
- 37.489
- 37.335
- 31.542
- 31.349
- 28.918
- 26.062
- 23.375
- 21.347
- 17.919
- 10.974

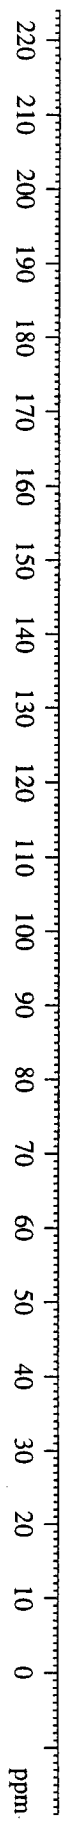

S51

500 MHz in CDCl<sub>3</sub>  
11-acetoxy-4-deoxyasbestinin D  
Authentic sample

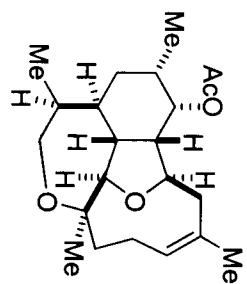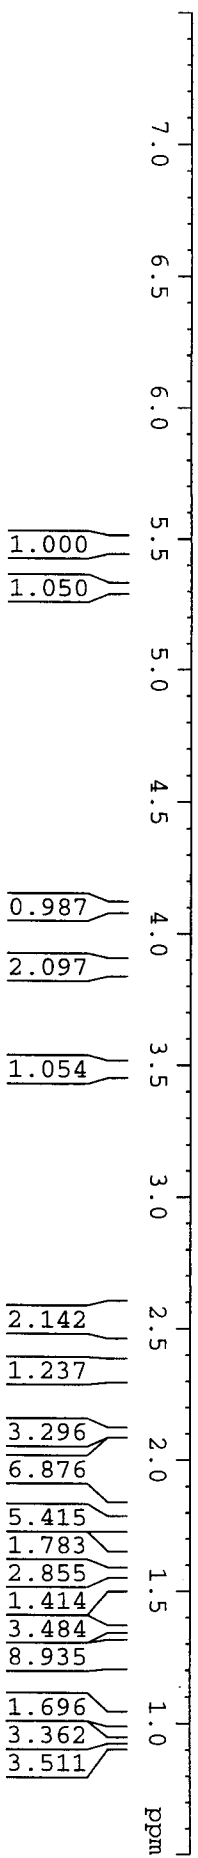

S52
